# Supplementary material for: Canalized gene expression during development mediates caste differentiation in ants
Source: Research Square preprint supplement (doi:10.21203/rs.3.rs-1432093/v1), 2022-03-16
Supplement: Supplementary file 2 [file 599df1e757086747b57b6026.xlsx]

## Sheet: Larval (body size controlled)
GeneID (M. pharaonis)	Log2 expression difference (M.pharaonis)	FDR adjusted pvalue (M.pharaonis)	GeneID (A.echinatior, In house)	Log2 expression difference (A. echinatior)	FDR adjusted pvalue (A. echinatior)	Gene name (NCBI)	Orthologs (D. melanogaster)	Interpro domain
LOC105839887	6.66754	2.75703e-11	gene_3866	6.60624	3.01183e-23	uncharacterized LOC105839887%2C transcript variant X1	NA	NA
LOC105840599	3.41048	5.60497e-08	gene_5613	6.98901	2.22062e-19	uncharacterized LOC105840599	NA	UDP-glucuronosyl/UDP-glucosyltransferase
LOC105829985	3.69998	8.92726e-06	gene_11472	4.97674	1.5142e-17	elongation of very long chain fatty acids protein	bond	ELO family
LOC105829266	-1.96174	1.13903e-05	gene_5323	-7.2079	7.22433e-15	hexamerin	NA	Hemocyanin, C-terminal
LOC105828778	1.51227	0.000391133	gene_6805	9.21342	7.88235e-30	lysosomal acid glucosylceramidase%2C transcript variant X5	Gba1a, Gba1b	Glycoside hydrolase family 30
LOC105837595	2.69943	4.63008e-05	gene_7263	4.62599	1.39352e-13	circadian clock-controlled protein daywake	CG15497	Haemolymph juvenile hormone binding
LOC105829984	2.43314	2.39621e-05	gene_11469	4.54118	2.06744e-08	elongation of very long chain fatty acids protein	NA	ELO family
LOC105836797	2.36	0.00236422	gene_12931	4.14607	5.47329e-17	acyl-CoA synthetase short-chain family member 3%2C mitochondrial%2C transcript variant X2	CG6432	Acetyl-coenzyme A synthetase, N-terminal domain
LOC105837345	2.94623	0.00133394	gene_13325	3.30596	0.000336277	PE-PGRS family protein PE_PGRS26%2C transcript variant X4	CG43386	NA
LOC118644039	2.62047	0.012736	gene_3825	3.66267	9.0174e-10	endocuticle structural glycoprotein ABD-4	CG7131, Cpr49Ah	Insect cuticle protein
LOC105830925	2.5366	0.00840551	gene_7140	3.73127	4.35108e-06	endocuticle structural glycoprotein SgAbd-2	Cpr49Aa, Cpr49Ae	Insect cuticle protein
LOC105839506	2.72605	5.19197e-09	gene_536	3.16314	1.02275e-13	fatty acyl-CoA reductase 1	CG4020	Fatty acyl-CoA reductase, C-terminal
LOC105829987	2.74567	1.52184e-06	gene_11751	3.05754	2.35539e-16	elongation of very long chain fatty acids protein AAEL008004%2C transcript variant X3	sit	ELO family
LOC105836669	-2.58553	1.74656e-05	gene_6525	-3.12211	4.25119e-14	sodium/calcium exchanger regulatory protein 1	NA	Cytosolic fatty-acid binding
LOC118644092	2.16084	1.1716e-05	gene_2845	3.59924	1.97587e-09	probable cytochrome P450 6a14%2C transcript variant X2	NA	Cytochrome P450
LOC105839757	2.81955	9.41246e-06	gene_13235	2.71809	4.96579e-14	fatty acid synthase	FASN3	Acyl transferase
LOC105837783	1.14896	0.0036626	gene_12574	6.48174	2.10584e-17	lipase member H%2C transcript variant X1	NA	Lipase/vitellogenin
LOC105835596	1.28786	0.0974492	gene_6419	5.07596	8.2861e-17	uncharacterized LOC105835596	NA	NA
LOC105828499	1.28881	0.000966155	gene_1662	4.74659	2.60121e-76	tryptophan 2%2C3-dioxygenase%2C transcript variant X1	v	Tryptophan 2,3-dioxygenase
LOC105839421	1.55536	0.31746	gene_5629	3.82608	5.91673e-06	uncharacterized LOC105839421	NA	NA
LOC105833520	1.6514	8.81679e-05	gene_8180	3.43692	4.90123e-12	scavenger receptor class B member 1%2C transcript variant X2	dsb	CD36 family
LOC105828900	1.56775	0.0191928	gene_14770	3.59966	2.46439e-09	clavesin-2%2C transcript variant X1	Cralbp
LOC105833908	1.76661	5.0941e-05	gene_11474	2.937	2.87557e-13	elongation of very long chain fatty acids protein AAEL008004%2C transcript variant X2	CG33110	ELO family
LOC105837657	2.75833	1.29931e-06	gene_11295	1.79199	1.84254e-06	cytochrome b5	NA	Cytochrome b5-like heme/steroid binding domain
LOC105834129	-1.45055	0.000251022	gene_11006	-3.16917	9.95278e-14	uncharacterized LOC105834129%2C transcript variant X1	NA	NA
LOC105828258	1.95325	0.000128604	gene_10119	2.31997	0.00439946	luciferin 4-monooxygenase-like%2C transcript variant X1	NA	AMP-binding enzyme, C-terminal domain
LOC105837788	1.9613	4.45314e-11	gene_6501	2.28512	7.80804e-10	uncharacterized LOC105837788%2C transcript variant X2	CG31324	NA
LOC105832961	1.58132	2.99602e-07	gene_15067	2.82557	1.68116e-12	scavenger receptor class B member 1	CG10345
LOC105837944	-1.60563	0.188641	gene_1391	-2.75108	0.00160032	uncharacterized LOC105837944%2C transcript variant X6	NA	NA
LOC105833048	1.50098	0.00067205	gene_4141	2.92601	5.17451e-10	putative fatty acyl-CoA reductase CG5065%2C transcript variant X1	CG1441	Fatty acyl-CoA reductase, C-terminal
LOC105831052	1.26091	0.117638	gene_6320	3.43869	5.44288e-15	venom protease	NA	Peptidase S1A, chymotrypsin family
LOC105834146	1.90132	0.0865509	gene_11872	2.26949	0.00773193	pollen-specific leucine-rich repeat extensin-like protein 4	TwdlE
LOC114254901	2.05807	1.21876e-08	gene_13803	2.06014	0.000642461	glucose dehydrogenase [FAD%2C quinone]%2C transcript variant X3	CG12539, CG9522	Glucose-methanol-choline oxidoreductase, C-terminal
LOC105831213	3.34978	8.83403e-06	gene_11361	1.21006	0.0740395	alpha-tocopherol transfer protein-like	CG2663
LOC105829602	1.81465	0.0648489	gene_13263	2.12629	0.00284973	uncharacterized LOC105829602%2C transcript variant X3	CG32694	NA
LOC105834103	1.35221	0.00281499	gene_10687	2.83304	4.30395e-07	uncharacterized LOC105834103	NA	Major facilitator superfamily
LOC105828975	1.84107	0.130099	gene_3151	1.98278	0.000717219	uncharacterized LOC105828975	CG34115	NA
LOC105837311	3.15733	1.90699e-11	gene_13322	1.14874	0.00773803	uncharacterized LOC105837311	CG9812	NA
LOC118644190	0.958719	2.13579e-05	gene_5415	3.6519	2.47812e-11	facilitated trehalose transporter Tret1-like	CG31100	Major facilitator superfamily domain
LOC105837330	1.63252	0.0546301	gene_13323	2.12814	0.000896583	uncharacterized LOC105837330	NA	NA
LOC105836078	1.00229	0.0912617	gene_1115	3.45697	3.93823e-26	probable cytochrome P450 301a1%2C mitochondrial	Cyp301a1	Cytochrome P450
LOC105839383	2.64311	2.9473e-05	gene_9358	1.22852	1.35745e-06	scavenger receptor class B member 1%2C transcript variant X1	CG40006	CD36 family
LOC105834546	1.51695	0.00148653	gene_9251	2.0888	6.4792e-07	monocarboxylate transporter 9%2C transcript variant X4	CG8028	Major facilitator superfamily
LOC105838922	1.1565	0.0924503	gene_3735	2.73258	1.16202e-12	cysteine dioxygenase type 1	CG5493	Cysteine dioxygenase type I
LOC105837554	1.48546	0.0188851	gene_10783	2.1083	0.000104257	plancitoxin-1%2C transcript variant X2	DNaseII	Deoxyribonuclease II
LOC118645055	3.8285	0.000367896	gene_9519	0.813191	0.202304	farnesyl pyrophosphate synthase-like%2C transcript variant X2	Fpps	Polyprenyl synthetase
LOC105837076	-1.07942	0.158232	gene_9530	-2.85716	8.33295e-06	guanine nucleotide-binding protein subunit gamma-e	Ggamma30A	G-protein gamma-like domain
LOC105836847	1.26921	0.122085	gene_9275	2.40169	5.98511e-08	heparan sulfate 2-O-sulfotransferase pipe	pip	Sulfotransferase
LOC118644738	0.84098	0.0685873	gene_2845	3.59924	1.97587e-09	cytochrome P450 6A1-like	NA	Cytochrome P450
LOC105836863	1.46043	0.00133394	gene_9081	2.04618	0.00155775	cytochrome P450 4g15	Cyp4g1	Cytochrome P450
LOC105834104	1.05002	5.31639e-11	gene_10687	2.83304	4.30395e-07	synaptic vesicle glycoprotein 2B	NA	Major facilitator superfamily
LOC105839868	-2.27689	0.0129942	gene_11103	-1.29855	0.320553	uncharacterized LOC105839868	NA	Mite allergen, group-7
LOC105840379	1.27065	0.00476612	gene_1160	2.26715	1.53659e-06	retinol dehydrogenase 14	CG7675	Short-chain dehydrogenase/reductase SDR
LOC118645262	3.50587	0.00110219	gene_9519	0.813191	0.202304	farnesyl pyrophosphate synthase-like	Fpps	Polyprenyl synthetase
LOC105832438	1.05503	0.00163486	gene_1077	2.59414	4.82789e-11	flavin-containing monooxygenase FMO GS-OX4%2C transcript variant X2	NA	Flavin monooxygenase FMO
LOC105831480	1.18678	0.274232	gene_11980	2.27906	1.94121e-08	acyl-CoA Delta(11) desaturase%2C transcript variant X14	CG8630	Acyl-CoA desaturase
LOC105832198	1.75152	0.000129327	gene_9888	1.53698	2.20292e-05	patched domain-containing protein 3	Ptr	Protein patched/dispatched
LOC105831357	-0.881868	0.00503942	gene_5112	-3.01155	2.74116e-05	uncharacterized LOC105831357%2C transcript variant X2	CG12994, CG17193	NA
LOC105834551	2.07997	0.00513313	gene_474	1.26928	0.000604715	uncharacterized LOC105834551%2C transcript variant X2	CG31344	Domain of unknown function DUF2236
LOC105828554	1.72179	0.00133394	gene_13740	1.52826	5.97477e-05	venom carboxylesterase-6%2C transcript variant X1	CG6414	Carboxylesterase, type B
LOC105835593	1.67567	0.029135	gene_9489	1.56186	0.00318456	uncharacterized LOC105835593%2C transcript variant X2	slf	C-type lectin-like
LOC105838971	0.937719	0.0517785	gene_193	2.67084	1.10469e-12	uncharacterized LOC105838971%2C transcript variant X1	NA	NA
LOC105839360	0.859482	0.116784	gene_13499	2.87889	2.15145e-10	uncharacterized LOC105839360	CG31516, CG8568	Domain of unknown function DUF4773
LOC105834965	1.30135	2.28236e-05	gene_13919	1.87147	3.01983e-08	CCAAT/enhancer-binding protein	slbo	Basic-leucine zipper domain
LOC105830233	0.970255	0.50665	gene_8776	2.50516	7.27025e-05	uncharacterized LOC105830233%2C transcript variant X1	CG7330	NA
LOC105834854	-1.20643	0.0822202	gene_8477	-2.00893	8.58793e-12	proton channel OtopLc%2C transcript variant X8	OtopLa	Otopetrin
LOC105836775	1.09963	0.0150486	gene_10608	2.15551	0.00630022	tetratricopeptide repeat protein 36	CG14105	Tetratricopeptide repeat-containing domain
LOC105838564	0.825788	0.461402	gene_9872	2.80408	2.9966e-08	fibrillin-2	NimC2, eater	Cysteine rich repeat, tripleX
LOC105832328	-1.49234	0.00272569	gene_3773	-1.53142	0.16804	protein G12	CG15712, jtb, CG4409	Insect allergen-related
LOC105839607	1.87494	0.00820389	gene_9112	1.10634	0.0315518	uncharacterized histidine-rich protein DDB_G0274557-like	CG14752	NA
LOC118647708	1.64823	0.00210474	gene_14209	1.25562	3.17542e-09	alpha-methylacyl-CoA racemase-like%2C transcript variant X2	Amacr	CoA-transferase family III
LOC105834506	0.930474	0.270479	gene_12731	2.2165	0.000110873	uncharacterized LOC105834506%2C transcript variant X3	CG10005	Zona pellucida domain
LOC105838916	1.46456	0.0116599	gene_6273	1.38533	0.000161629	uncharacterized LOC105838916	CG31344	Domain of unknown function DUF2236
LOC105829006	1.40238	0.0127299	gene_3723	1.42801	0.00350273	4-coumarate--CoA ligase 1%2C transcript variant X3	NA	AMP-binding enzyme, C-terminal domain
LOC105838647	-1.02886	0.0781365	gene_9783	-1.91642	0.00070416	SIFamide-related peptide%2C transcript variant X1	SIFa	NA
LOC105836368	-0.828679	0.00598981	gene_5729	-2.36019	8.43587e-10	uncharacterized LOC105836368%2C transcript variant X3	CG9919	NA
LOC105839742	0.933643	0.382477	gene_8594	2.08521	4.17006e-09	purine nucleoside phosphorylase%2C transcript variant X2	CG18128, CG16758	Nucleoside phosphorylase domain
LOC105840746	0.917129	0.119333	gene_3968	2.1006	2.43366e-06	uncharacterized LOC105840746%2C transcript variant X2	NA	NA
LOC105831429	-1.23398	0.010774	gene_15053	-1.55362	1.24686e-08	prenylcysteine oxidase	NA
LOC118644164	0.835798	0.387878	gene_11980	2.27906	1.94121e-08	acyl-CoA Delta(11) desaturase-like	CG8630	Acyl-CoA desaturase
LOC105838027	1.10946	0.00180586	gene_9794	1.71469	1.42087e-09	probable 4-coumarate--CoA ligase 3%2C transcript variant X3	NA	AMP-binding enzyme, C-terminal domain
LOC105832295	0.895245	0.617154	gene_6564	2.07526	0.00167552	uncharacterized LOC105832295	CG12540	NA
LOC105828871	1.22338	0.170946	gene_5125	1.51177	0.000116415	transcriptional regulator ovo%2C transcript variant X4	ovo	Zinc finger C2H2-type
LOC105839499	-1.33364	0.170791	gene_334	-1.35777	0.255517	uncharacterized LOC105839499	NA	Haemolymph juvenile hormone binding
LOC105836243	1.0739	0.00074615	gene_15010	1.64741	5.59502e-07	peptide methionine sulfoxide reductase%2C transcript variant X2	MsrA	Peptide methionine sulphoxide reductase MsrA
LOC105840058	-1.08586	0.08064	gene_15014	-1.62337	3.67048e-09	uncharacterized LOC105840058%2C transcript variant X2	CG3257	Domain of unknown function DUF4802
LOC105839979	-0.912625	0.000179801	gene_12957	-1.92971	2.04219e-09	septin-2%2C transcript variant X2	2004-09-01	Septin-type guanine nucleotide-binding (G) domain
LOC105839793	-0.904411	0.505054	gene_4866	-1.94354	1.21212e-06	ELAV-like protein 3%2C transcript variant X15	elav, fne, Rbp9	Paraneoplastic encephalomyelitis antigen
LOC118645930	1.23035	0.0122216	gene_5068	1.36253	0.00067411	retinol dehydrogenase 12-like	NA	Short-chain dehydrogenase/reductase SDR
LOC105833150	1.72408	0.000313863	gene_8933	0.955105	0.0838001	collagen alpha-5(IV) chain	frm	Collagen triple helix repeat
LOC118644185	-1.00848	0.0299919	gene_15014	-1.62337	3.67048e-09	uncharacterized LOC118644185%2C transcript variant X2	CG3257	Domain of unknown function DUF4802
LOC105838731	-0.933561	0.0171638	gene_144	-1.70923	1.21076e-07	class E basic helix-loop-helix protein 22%2C transcript variant X2	Oli	Myc-type, basic helix-loop-helix (bHLH) domain
LOC105829354	-0.965187	0.00200432	gene_5091	-1.64254	9.07317e-08	uncharacterized LOC105829354%2C transcript variant X1	CG14321	Protein of unknown function DUF4787
LOC105835899	-0.961631	0.384078	gene_2403	-1.64039	5.82358e-05	CUGBP Elav-like family member 4%2C transcript variant X6	bru3	RNA recognition motif domain
LOC105835507	0.847442	0.0995724	gene_1528	1.81189	0.000214116	alpha-tocopherol transfer protein-like%2C transcript variant X1	NA
LOC105837684	1.01746	4.4078e-05	gene_10052	1.45278	0.000392342	Krueppel homolog 1	Kr-h1	Zinc finger C2H2-type
LOC105836274	0.807142	0.300148	gene_14762	1.82561	1.93243e-05	dnaJ homolog subfamily C member 22	wus	DnaJ domain
LOC105839422	0.809278	0.487607	gene_5630	1.77697	0.00208929	uncharacterized LOC105839422	CG15905	NA
LOC105829215	-1.52087	0.0729891	gene_3122	-0.929462	0.0689047	probable alpha-ketoglutarate-dependent hypophosphite dioxygenase	NA	Phytanoyl-CoA dioxygenase
LOC105833857	-0.897447	0.102109	gene_1903	-1.57492	3.43944e-06	elongation factor 1-alpha%2C transcript variant X4	eEF1alpha2, eEF1alpha1	Translation elongation factor EFTu-like, domain 2
LOC105836734	0.913783	0.166649	gene_6053	1.52947	0.00266784	inositol monophosphatase 2	CG17028, CG17029	Inositol monophosphatase-like
LOC105830978	-1.31548	0.00305749	gene_1835	-1.05998	1.77283e-05	aminopeptidase N	CG40470
LOC105829493	0.916119	0.0438792	gene_12775	1.44971	0.000331674	collagen alpha-1(IV) chain	Col4a1	Collagen IV, non-collagenous
LOC105832252	1.56816	0.00803888	gene_1813	0.842712	1.42198e-05	rhophilin-2	Rhp
LOC105828537	1.1525	0.235732	gene_4248	1.14649	3.05991e-07	uncharacterized LOC105828537%2C transcript variant X2	Osi2
LOC105834881	1.36571	0.0168529	gene_5880	0.962779	0.0813926	chymotrypsin-2	CG32808, CG12951, CG16749	Peptidase S1A, chymotrypsin family
LOC105837304	1.06092	0.323259	gene_13317	1.22949	0.00510158	uncharacterized LOC105837304%2C transcript variant X4	CG5928	NA
LOC105829658	-1.57488	0.0138864	gene_1180	-0.825167	0.333572	uncharacterized LOC105829658	CG8483	CAP domain
LOC105828953	1.00459	0.0948089	gene_3069	1.28716	0.00425304	uncharacterized LOC105828953	NA	NA
LOC105838815	0.831972	0.275224	gene_7175	1.54709	2.57296e-07	transcription factor SPT20 homolog%2C transcript variant X3	mtg	Chitin binding domain
LOC105828352	1.49358	0.0409906	gene_6787	0.847917	0.269987	putative defense protein 3	CG14515	Reeler domain
LOC105833927	1.11673	1.75573e-06	gene_8795	1.11841	8.99799e-06	serine hydrolase-like protein	NA	Alpha/beta hydrolase fold-1
LOC105832896	1.2895	0.0966841	gene_5880	0.962779	0.0813926	chymotrypsin-2	CG32808, CG12951, CG16749	Peptidase S1A, chymotrypsin family
LOC105828343	0.997046	0.0223048	gene_13340	1.18691	0.000519321	GTP cyclohydrolase 1	Pu	GTP cyclohydrolase I domain
LOC105829324	1.23187	0.00276097	gene_13966	0.947284	0.00375541	carbonic anhydrase 1%2C transcript variant X2	NA	Alpha carbonic anhydrase domain
LOC105839732	-0.811942	0.18581	gene_3926	-1.41887	5.77387e-07	transcription factor Sox-2%2C transcript variant X5	SoxN	High mobility group box domain
LOC105829718	1.03108	0.0121052	gene_6508	1.07976	0.0222383	solute carrier family 23 member 1%2C transcript variant X1	CG6293	Xanthine/uracil/vitamin C permease
LOC105829095	-0.95329	0.00598731	gene_13722	-1.15928	1.56334e-07	cubilin%2C transcript variant X1	CG34370	CUB domain
LOC105829627	-0.938828	0.0641863	gene_3701	-1.16375	0.35244	uncharacterized LOC105829627	obst-G, Muc68E, obst-F	Chitin binding domain
LOC105832683	1.08434	0.0219688	gene_6222	0.996025	0.00357479	fatty acid hydroxylase domain-containing protein 2%2C transcript variant X2	CG1998, CG11162	Fatty acid hydroxylase
LOC105838529	0.885316	0.000229331	gene_13386	1.21156	5.3477e-05	aldo-keto reductase family 1 member B1	Akr1B	Aldo/keto reductase
LOC105839934	-0.973184	0.000367896	gene_3987	-1.10046	6.52463e-06	JNK-interacting protein 1%2C transcript variant X3	Aplip1	PTB/PI domain
LOC105834096	0.801994	0.301906	gene_8811	1.29732	0.000335109	inner centromere protein A	NA	Basic-leucine zipper domain
LOC105831134	-1.05872	0.0877362	gene_12698	-0.982618	2.1002e-07	glutamate-gated chloride channel%2C transcript variant X3	GluClalpha	Gamma-aminobutyric acid A receptor/Glycine receptor alpha
LOC105831888	0.826668	0.200918	gene_9294	1.24842	0.00134405	uncharacterized LOC105831888	CG30380	NA
LOC105837326	-1.14176	0.0517785	gene_11480	-0.900916	0.000867713	uncharacterized LOC105837326%2C transcript variant X1	CG3955	NA
LOC105831123	1.08736	0.0308418	gene_1280	0.935786	2.89083e-05	transmembrane protease serine 11G	CG9372	Peptidase S1A, chymotrypsin family
LOC105840086	0.880373	0.0951666	gene_7654	1.12373	0.0296282	homogentisate 1%2C2-dioxygenase%2C transcript variant X1	hgo	Homogentisate 1,2-dioxygenase
LOC105828584	-0.889465	0.074622	gene_890	-1.11126	0.000166657	peroxiredoxin-6	Prx2540-2, Prx2540-1, CG12896	Alkyl hydroperoxide reductase subunit C/ Thiol specific antioxidant
LOC105837161	-0.960398	0.00791673	gene_11721	-1.02401	0.00040664	CD63 antigen	Tsp39D	Tetraspanin
LOC105833972	0.937502	0.243307	gene_4928	1.04789	0.176821	sodium-coupled monocarboxylate transporter 1	NA	Sodium/solute symporter
LOC105831000	1.06294	0.00690351	gene_2761	0.893738	0.0144564	protein D2	CG30060	Phosphatidylethanolamine-binding protein
LOC105832967	0.903692	1.43928e-05	gene_1044	1.0411	1.08476e-06	serine palmitoyltransferase 2%2C transcript variant X1	lace	Aminotransferase, class I/classII
LOC105833440	-0.837972	0.0506562	gene_10291	-1.10128	4.03713e-05	locomotion-related protein Hikaru genki	hig	Immunoglobulin-like domain
LOC105839332	-0.829851	0.397245	gene_12773	-1.08144	4.14837e-07	neural-cadherin%2C transcript variant X8	CadN2, CadN	Cadherin-like
LOC105835720	-0.829547	0.00309315	gene_3920	-1.02646	0.0170214	uncharacterized LOC105835720	NA	NA
LOC105831744	0.838575	0.0108507	gene_11956	0.993534	1.72821e-07	ATP-binding cassette sub-family G member 1%2C transcript variant X3	CG3164	ABC transporter-like
LOC105836494	1.03788	0.198335	gene_5035	0.802031	0.0323625	uncharacterized LOC105836494%2C transcript variant X1	scaf	Inactive serine protease scarface, clip-domain
LOC105828505	0.901551	0.084027	gene_9681	0.898591	0.00454102	ATP-binding cassette sub-family G member 1%2C transcript variant X2	CG17646	ABC transporter family G domain
LOC105830464	-0.835346	0.0143926	gene_3956	-0.963175	0.000854719	multiple coagulation factor deficiency protein 2 homolog%2C transcript variant X2	CG12817	NA
LOC105833912	-0.873009	0.0417161	gene_6045	-0.920225	9.80505e-06	LIM homeobox transcription factor 1-beta%2C transcript variant X1	Lmx1a	Homeobox domain
LOC105838032	-0.807906	0.0497544	gene_9978	-0.97701	0.00491495	uncharacterized LOC105838032%2C transcript variant X2	CG4133	Zinc finger C2H2-type
LOC105837631	0.802096	0.125911	gene_7568	0.955297	1.49479e-05	4-coumarate--CoA ligase 1%2C transcript variant X2	CG6178	AMP-binding enzyme, C-terminal domain
LOC105828747	0.915251	0.0197081	gene_2751	0.821601	4.74488e-07	uncharacterized LOC105828747%2C transcript variant X2	NA	Chitin binding domain
LOC105830167	-0.811129	0.0461456	gene_12923	-0.913282	0.00116806	protein big brother	Bro, Bgb	Core-binding factor, beta subunit
LOC105839257	0.882497	0.0532244	gene_9782	0.835323	0.313169	uncharacterized LOC105839257	NA	NA
LOC105828244	0.833414	0.216148	gene_11530	0.858881	0.00647763	cAMP-dependent protein kinase catalytic subunit PRKX%2C transcript variant X2	Pka-C3	AGC-kinase, C-terminal

## Sheet: 2nd larval instar
GeneID (M.pharaonis, NCBI)	log2 Foldchange (M.pharaonis)	FDR adjusted pvalue (M.pharaonis)	GeneID (A.echinatior, in house)	log2 Foldchange (A.echinatior)	FDR adjusted pvalue (A.echinatior)	Gene name (NCBI)	Orthologs (D. melanogaster)
LOC105839887	4.45013	1.28903e-05	gene_3866	4.68363	6.7262e-21	uncharacterized LOC105839887%2C transcript variant X1	NA
LOC105840599	2.97542	5.72791e-06	gene_5613	3.56106	6.98005e-10	uncharacterized LOC105840599	NA
LOC105837063	2.6872	0.00150303	gene_13535	2.48555	0.000677113	cuticle protein 64	NA
LOC105828499	1.13148	0.000541458	gene_1662	4.72097	1.55502e-63	tryptophan 2%2C3-dioxygenase%2C transcript variant X1	v
LOC105835596	1.68063	0.00245045	gene_6419	2.9454	5.05476e-11	uncharacterized LOC105835596	NA
LOC105828778	1.26196	0.000269241	gene_6805	3.86444	7.29042e-11	lysosomal acid glucosylceramidase%2C transcript variant X5	Gba1a, Gba1b
LOC105837783	1.83921	6.37229e-06	gene_12574	2.56477	2.85357e-07	lipase member H%2C transcript variant X1	NA
LOC105839757	1.94673	0.000112997	gene_13235	2.31751	3.48413e-14	fatty acid synthase	FASN3
LOC105834987	-1.22397	0.0295299	gene_13479	-3.57503	9.4466e-17	protein lethal(2)essential for life	l_2_efl
LOC105829987	1.96442	2.22706e-05	gene_11751	2.13494	1.08591e-14	elongation of very long chain fatty acids protein AAEL008004%2C transcript variant X3	sit
LOC105837785	1.60923	0.00676206	gene_12574	2.56477	2.85357e-07	lipase member H	NA
LOC105829985	2.52427	0.000294144	gene_11472	1.59982	4.62655e-07	elongation of very long chain fatty acids protein	bond
LOC105839506	2.28168	2.82034e-07	gene_536	1.75014	1.60176e-09	fatty acyl-CoA reductase 1	CG4020
LOC105840458	1.57538	0.000870816	gene_12786	2.07281	4.69918e-07	cytosolic 10-formyltetrahydrofolate dehydrogenase%2C transcript variant X2	CG8665
LOC105836797	1.38323	0.0159757	gene_12931	2.33645	3.41558e-13	acyl-CoA synthetase short-chain family member 3%2C mitochondrial%2C transcript variant X2	CG6432
LOC105833631	2.35068	0.000747351	gene_5988	1.34648	0.000974617	chitinase-3-like protein 1	Cht8, Cht9, Cht4
LOC105835107	1.89734	8.0326e-05	gene_12834	1.58059	1.98963e-13	trans-1%2C2-dihydrobenzene-1%2C2-diol dehydrogenase-like	CG3597, CG3609
LOC105828258	1.36964	0.00128976	gene_10119	1.87472	0.000473734	luciferin 4-monooxygenase-like%2C transcript variant X1	NA
LOC105840502	1.43944	0.0480191	gene_7446	1.75428	7.64368e-05	general transcriptional corepressor CYC8	NA
LOC105839430	1.15371	1.28903e-05	gene_2777	2.11425	5.36688e-07	uncharacterized LOC105839430	NA
LOC105828452	1.34277	6.04919e-05	gene_3302	1.75175	7.17621e-14	alpha-tocopherol transfer protein%2C transcript variant X2	CG5973
LOC105831052	1.08767	0.0475111	gene_6320	2.13241	3.11389e-11	venom protease	NA
LOC105838922	1.02097	0.0327407	gene_3735	2.21948	2.62839e-10	cysteine dioxygenase type 1	CG5493
LOC105838738	-1.02901	0.00119424	gene_9242	-2.17295	3.33664e-11	uncharacterized LOC105838738	fok
LOC105839934	-1.13614	1.82218e-06	gene_3987	-1.96144	8.8892e-15	JNK-interacting protein 1%2C transcript variant X3	Aplip1
LOC105834129	-1.66214	4.27349e-07	gene_11006	-1.3383	4.87367e-05	uncharacterized LOC105834129%2C transcript variant X1	NA
LOC105835917	1.10563	0.0142895	gene_12181	1.99861	8.08791e-10	alanine--glyoxylate aminotransferase 2-like	CG8745
LOC105837326	-1.28952	0.00228144	gene_11480	-1.6823	3.26516e-12	uncharacterized LOC105837326%2C transcript variant X1	CG3955
LOC118644185	-1.30427	9.00629e-05	gene_15014	-1.6482	1.63864e-12	uncharacterized LOC118644185%2C transcript variant X2	CG3257
LOC105834755	-1.21318	0.000587877	gene_8756	-1.7546	8.99525e-11	GSK-3-binding protein	NA
LOC105836368	-1.24361	2.16822e-05	gene_5729	-1.67347	8.14013e-11	uncharacterized LOC105836368%2C transcript variant X3	CG9919
LOC105839553	-1.09513	2.42992e-05	gene_12569	-1.89545	9.80027e-19	uncharacterized LOC105839553%2C transcript variant X3	NA
LOC105834854	-1.2937	0.00230004	gene_8477	-1.58255	3.27226e-12	proton channel OtopLc%2C transcript variant X8	OtopLa
LOC105831667	1.86167	1.65615e-07	gene_9123	1.08537	2.75459e-06	uncharacterized LOC105831667	GIIIspla2
LOC105829009	1.06797	0.042743	gene_7223	1.8919	9.04546e-07	alpha-crystallin A chain%2C transcript variant X1	NA
LOC105841057	1.27917	0.000304949	gene_12189	1.5404	5.05988e-15	medium-chain acyl-CoA ligase ACSF2%2C mitochondrial%2C transcript variant X4	CG12512
LOC105838856	-1.0459	0.00142989	gene_10941	-1.87206	7.48322e-11	pheromone-binding protein-related protein 6	NA
LOC105829718	1.06328	0.000666571	gene_6508	1.81817	1.89529e-09	solute carrier family 23 member 1%2C transcript variant X1	CG6293
LOC105830978	-1.03231	0.000658295	gene_1835	-1.84662	1.89599e-15	aminopeptidase N	CG40470
LOC105828554	1.75649	3.33898e-05	gene_13740	1.05582	2.2421e-05	venom carboxylesterase-6%2C transcript variant X1	CG6414
LOC105834104	1.13973	7.16414e-05	gene_10687	1.61568	5.14394e-06	synaptic vesicle glycoprotein 2B	NA
LOC105834881	1.77338	9.58376e-05	gene_5880	1.03782	0.000583612	chymotrypsin-2	CG32808, CG12951, CG16749
LOC105837788	1.45435	6.37229e-06	gene_6501	1.24625	3.06286e-05	uncharacterized LOC105837788%2C transcript variant X2	CG31324
LOC105840058	-1.07468	0.0105371	gene_15014	-1.6482	1.63864e-12	uncharacterized LOC105840058%2C transcript variant X2	CG3257
LOC105834715	-1.2089	0.000437043	gene_9394	-1.46304	1.03019e-13	uncharacterized LOC105834715%2C transcript variant X2	Fie
LOC105828594	-1.11247	0.000105273	gene_13166	-1.57136	6.03427e-11	CD151 antigen	Tsp74F
LOC105836855	-1.04289	0.0010834	gene_1663	-1.64451	6.57975e-13	REPTOR-binding partner%2C transcript variant X3	REPTOR-BP
LOC105837161	-1.1318	1.14843e-05	gene_11721	-1.464	1.3155e-13	CD63 antigen	Tsp39D
LOC105833028	-1.12857	0.00015182	gene_1275	-1.45229	3.99269e-12	uncharacterized LOC105833028	CG8369
LOC105832746	-1.02256	0.00226368	gene_3951	-1.59152	3.94395e-13	neuropeptide-like 1%2C transcript variant X1	NA
LOC105837629	1.10745	0.00707869	gene_7564	1.44373	1.66492e-05	neuroparsin-A	NA
LOC105834546	1.32389	0.000747371	gene_9251	1.17477	1.8428e-06	monocarboxylate transporter 9%2C transcript variant X4	CG8028
LOC105838132	1.01827	0.000920885	gene_4469	1.49893	1.50356e-14	dihydrofolate reductase%2C transcript variant X2	Dhfr
LOC105838731	-1.32442	5.72791e-06	gene_144	-1.14914	4.51132e-06	class E basic helix-loop-helix protein 22%2C transcript variant X2	Oli
LOC105839745	1.05417	0.00111061	gene_8988	1.44301	1.07856e-18	aldehyde dehydrogenase%2C mitochondrial%2C transcript variant X1	Aldh
LOC105831123	1.0727	0.00880027	gene_1280	1.41655	2.16947e-13	transmembrane protease serine 11G	CG9372
LOC105830167	-1.24678	4.40604e-05	gene_12923	-1.20042	2.13799e-10	protein big brother	Bro, Bgb
LOC105830943	-1.41577	2.82034e-07	gene_8320	-1.0427	1.75751e-13	intraflagellar transport protein 43 homolog	IFT43
LOC105835286	1.11872	0.000925983	gene_3060	1.31477	5.279e-12	ras-related protein Rab-32%2C transcript variant X4	Rab32
LOC105831634	-1.30158	0.00085382	gene_9926	-1.11411	4.15629e-09	protein SCAI	CG13293
LOC105828868	1.23912	9.82108e-06	gene_2323	1.16886	8.85953e-09	cytochrome c	Cyt-c-p
LOC105836947	-1.16006	0.000114227	gene_11143	-1.2027	1.54154e-12	uncharacterized LOC105836947%2C transcript variant X1	CG31051
LOC105830031	-1.15822	0.021171	gene_7161	-1.19756	0.00312848	pro-corazonin	Crz
LOC105838647	-1.22606	0.00351353	gene_9783	-1.12416	0.00882826	SIFamide-related peptide%2C transcript variant X1	SIFa
LOC105835423	-1.00753	5.70954e-05	gene_7451	-1.35943	1.75209e-06	uncharacterized LOC105835423%2C transcript variant X2	NA
LOC105834927	-1.02941	3.99921e-05	gene_12159	-1.30871	2.80374e-07	uncharacterized LOC105834927%2C transcript variant X3	NA
LOC105832967	1.04669	3.65676e-07	gene_1044	1.27547	2.04711e-14	serine palmitoyltransferase 2%2C transcript variant X1	lace
LOC105834266	1.08497	1.14843e-05	gene_12911	1.2239	1.17106e-09	probable citrate synthase 2%2C mitochondrial%2C transcript variant X2	kdn, CG14740
LOC105840254	1.19455	0.00093884	gene_8487	1.06011	2.66613e-06	bombyxin B-5%2C transcript variant X1	NA
LOC105833691	-1.07563	8.45911e-05	gene_1657	-1.15985	5.41703e-15	uncharacterized protein KIAA0930 homolog%2C transcript variant X4	CG9646
LOC105837631	1.16946	0.000737645	gene_7568	1.06509	3.17295e-10	4-coumarate--CoA ligase 1%2C transcript variant X2	CG6178
LOC105831915	1.07495	0.0147401	gene_7038	1.15726	3.11389e-11	protein seele	sel
LOC105829883	1.16991	0.0230546	gene_8980	1.0612	0.00264299	uncharacterized LOC105829883	CG31997
LOC105831175	1.15759	0.002904	gene_3801	1.0655	5.66554e-08	sodium-independent sulfate anion transporter	CG5002, CG7912
LOC105836243	1.03977	0.000306405	gene_15010	1.14215	5.03703e-08	peptide methionine sulfoxide reductase%2C transcript variant X2	MsrA
LOC105840746	1.02681	0.0225046	gene_3968	1.15053	1.37445e-05	uncharacterized LOC105840746%2C transcript variant X2	NA
LOC105833857	-1.09487	0.00305655	gene_1903	-1.05481	6.79365e-06	elongation factor 1-alpha%2C transcript variant X4	eEF1alpha2, eEF1alpha1
LOC105839979	-1.02533	1.82218e-06	gene_12957	-1.03826	2.11495e-05	septin-2%2C transcript variant X2	2004-09-01
LOC105836202	-1.00354	0.000945643	gene_2035	-1.0559	8.35691e-14	sodium- and chloride-dependent GABA transporter 1%2C transcript variant X2	NA
LOC105837545	1.01683	4.88563e-05	gene_1899	1.01923	5.44534e-14	glycine--tRNA ligase	GlyRS

## Sheet: 3rd larval instar
GeneID (M.pharaonis, NCBI)	log2 Foldchange (M.pharaonis)	FDR adjusted pvalue (M.pharaonis)	GeneID (A.echinatior, in house)	log2 Foldchange (A.echinatior)	FDR adjusted pvalue (A.echinatior)	Gene name (NCBI)	Orthologs (D. melanogaster)
LOC105839887	5.92234	4.53688e-28	gene_3866	6.37335	1.09454e-25	uncharacterized LOC105839887%2C transcript variant X1	NA
LOC105829985	2.73477	1.18277e-08	gene_11472	3.67386	4.16223e-13	elongation of very long chain fatty acids protein	bond
LOC118646064	1.75341	0.00105181	gene_2854	5.34662	4.78737e-09	uncharacterized LOC118646064	NA
LOC105840599	1.41999	0.0230048	gene_5613	6.27502	3.80303e-15	uncharacterized LOC105840599	NA
LOC105828778	1.02736	0.00479273	gene_6805	7.74521	1.11782e-20	lysosomal acid glucosylceramidase%2C transcript variant X5	Gba1a, Gba1b
LOC105829486	2.3315	0.000550078	gene_8736	3.39685	1.00005e-07	alpha-tocopherol transfer protein%2C transcript variant X5	NA
LOC105836797	1.60612	2.89967e-06	gene_12931	4.5558	7.04692e-16	acyl-CoA synthetase short-chain family member 3%2C mitochondrial%2C transcript variant X2	CG6432
LOC105834146	1.81823	0.000175439	gene_11872	3.7298	5.9608e-06	pollen-specific leucine-rich repeat extensin-like protein 4	TwdlE
LOC105829987	2.61349	7.85838e-10	gene_11751	2.484	8.53015e-17	elongation of very long chain fatty acids protein AAEL008004%2C transcript variant X3	sit
LOC105837595	1.63507	1.85569e-06	gene_7263	3.96483	1.97473e-09	circadian clock-controlled protein daywake	CG15497
LOC118644277	2.12472	0.00429012	gene_5989	2.9781	2.35851e-05	chymotrypsin-1-like	NA
LOC105835983	1.99042	1.80616e-05	gene_3829	3.10472	4.68058e-05	endocuticle structural glycoprotein SgAbd-2	NA
LOC105835606	1.56105	0.000320526	gene_4346	3.37171	1.68529e-13	uncharacterized LOC105835606	NA
LOC105834720	4.31147	4.85293e-17	gene_9372	1.201	0.0392647	uncharacterized LOC105834720	CG16820, CG5867, CG5945
LOC105830012	1.70237	2.87962e-06	gene_1563	3.03482	4.13608e-08	reticulocyte-binding protein PFD0110w	NA
LOC105838993	1.2585	2.73934e-05	gene_6146	4.07979	5.56861e-09	uncharacterized LOC105838993	NA
LOC105829984	2.064	8.2501e-05	gene_11469	2.44717	3.58597e-09	elongation of very long chain fatty acids protein	NA
LOC105839602	1.05623	0.000185967	gene_5415	4.51822	2.80787e-18	facilitated trehalose transporter Tret1	CG31100
LOC105837788	2.35536	5.29499e-10	gene_6501	1.88732	7.55094e-08	uncharacterized LOC105837788%2C transcript variant X2	CG31324
LOC105837789	1.39743	7.09778e-09	gene_539	3.18058	0.000149728	glucose dehydrogenase [FAD%2C quinone]	CG9521, CG9519
LOC105837345	1.63756	0.00333171	gene_13325	2.62236	0.000546732	PE-PGRS family protein PE_PGRS26%2C transcript variant X4	CG43386
LOC105834707	1.3329	0.000109	gene_539	3.18058	0.000149728	glucose dehydrogenase [FAD%2C quinone]	CG9521, CG9519
LOC118644738	1.45101	0.01463	gene_2845	2.90017	3.42124e-06	cytochrome P450 6A1-like	NA
LOC105834103	1.3252	0.000891657	gene_10687	3.08084	1.17839e-05	uncharacterized LOC105834103	NA
LOC105838922	1.46648	8.05685e-05	gene_3735	2.76863	6.81288e-09	cysteine dioxygenase type 1	CG5493
LOC105831183	1.26683	0.0120077	gene_758	3.17075	9.13811e-11	uncharacterized LOC105831183	NA
LOC105834104	1.26156	4.30795e-06	gene_10687	3.08084	1.17839e-05	synaptic vesicle glycoprotein 2B	NA
LOC105838544	2.13012	0.00105181	gene_8461	1.79875	2.44267e-05	vasorin	NA
LOC105835917	1.30103	0.00789335	gene_12181	2.93531	0.000959447	alanine--glyoxylate aminotransferase 2-like	CG8745
LOC105831052	1.65739	1.32268e-05	gene_6320	2.25413	1.99928e-06	venom protease	NA
LOC105835353	1.60097	0.00162095	gene_3076	2.32186	0.000554835	NPC intracellular cholesterol transporter 2	Npc2c, Npc2d, Npc2e
LOC105839941	1.38152	0.00981289	gene_9642	2.66898	5.81978e-06	kynurenine/alpha-aminoadipate aminotransferase%2C mitochondrial	NA
LOC105832896	1.45921	0.0193215	gene_5880	2.41427	2.80367e-07	chymotrypsin-2	CG32808, CG12951, CG16749
LOC105835004	-1.86959	0.000224026	gene_11236	-1.87497	0.00118956	uncharacterized LOC105835004	NA
LOC105836605	1.28553	5.58569e-06	gene_13397	2.69191	8.36733e-11	sodium-coupled neutral amino acid transporter 9 homolog%2C transcript variant X3	NA
LOC105834881	1.36948	0.00583549	gene_5880	2.41427	2.80367e-07	chymotrypsin-2	CG32808, CG12951, CG16749
LOC118645095	1.60445	0.0250037	gene_9973	2.05422	0.0056803	trypsin-1-like	CG7142, Phae2, Phae1, CG11911, CG11912
LOC105839614	1.86697	3.10844e-06	gene_6428	1.71418	1.34302e-05	androgen-induced gene 1 protein%2C transcript variant X1	CG6149, CG11601, CG3625
LOC105834546	1.44479	0.00166902	gene_9251	2.20183	4.09983e-06	monocarboxylate transporter 9%2C transcript variant X4	CG8028
LOC105834946	2.61849	2.50878e-05	gene_9372	1.201	0.0392647	uncharacterized LOC105834946	CG16820, CG5867, CG5945
LOC105839084	1.72405	0.00692596	gene_5127	1.81107	0.000171812	cytochrome P450 4g15	Cyp4g15
LOC105839757	1.89703	1.2285e-07	gene_13235	1.61778	0.000761754	fatty acid synthase	FASN3
LOC105833218	1.56616	0.000137478	gene_1175	1.91426	4.63744e-06	uncharacterized LOC105833218	NA
LOC105830009	1.208	0.0107103	gene_1564	2.45978	6.61261e-05	high affinity copper uptake protein 1%2C transcript variant X1	Ctr1B
LOC105829006	1.53272	0.000193551	gene_3723	1.88066	0.000130421	4-coumarate--CoA ligase 1%2C transcript variant X3	NA
LOC114254901	2.34458	5.50729e-09	gene_13803	1.22445	0.0444367	glucose dehydrogenase [FAD%2C quinone]%2C transcript variant X3	CG12539, CG9522
LOC105839506	1.7909	2.3786e-09	gene_536	1.60098	0.000112355	fatty acyl-CoA reductase 1	CG4020
LOC105837563	1.68947	4.45134e-10	gene_2312	1.66188	5.73795e-07	multidrug resistance-associated protein 4%2C transcript variant X3	NA
LOC105834927	-1.19871	5.97205e-06	gene_12159	-2.25159	2.64697e-08	uncharacterized LOC105834927%2C transcript variant X3	NA
LOC105838808	1.15367	1.12604e-05	gene_2914	2.32198	0.000198772	uncharacterized LOC105838808%2C transcript variant X4	NA
LOC105834967	1.21995	0.000371358	gene_13680	2.14441	7.79441e-10	sodium-coupled monocarboxylate transporter 1	NA
LOC105837811	1.17077	0.00682045	gene_2705	2.1448	0.00137341	spermidine synthase	SpdS
LOC105834854	-1.324	2.33196e-05	gene_8477	-1.88445	7.20781e-08	proton channel OtopLc%2C transcript variant X8	OtopLa
LOC105837832	1.38503	3.84266e-10	gene_8363	1.7645	0.00131953	gonadotropin-releasing hormone receptor	CrzR
LOC105832901	2.03845	4.76242e-08	gene_5882	1.18601	0.000676265	LIRP	Ilp1, Ilp5, Ilp3
LOC118644158	1.32002	2.33527e-07	gene_5138	1.82905	2.86703e-11	isopentenyl-diphosphate Delta-isomerase 1-like	Idi
LOC105834551	1.00649	0.00196063	gene_474	2.39446	1.2924e-07	uncharacterized LOC105834551%2C transcript variant X2	CG31344
LOC105833690	1.58884	2.20466e-07	gene_1302	1.5127	6.42798e-05	spondin-1%2C transcript variant X2	fat-spondin
LOC105837161	-1.23901	3.15099e-05	gene_11721	-1.89326	3.18079e-11	CD63 antigen	Tsp39D
LOC105837535	1.35183	0.0196408	gene_13776	1.7214	0.0001966	lipase 3	CG31871, CG7329, CG18302, CG18301, Lip4
LOC105834317	1.76501	3.74296e-05	gene_11553	1.29673	0.000897765	peroxisomal hydratase-dehydrogenase-epimerase	Pdh, CG4842, CG18814
LOC105833927	1.39396	1.33553e-08	gene_8795	1.64044	6.83895e-10	serine hydrolase-like protein	NA
LOC105839904	1.15434	6.39052e-05	gene_724	1.8938	4.5985e-12	uncharacterized LOC105839904%2C transcript variant X2	CG3246
LOC105831667	1.28879	1.46426e-05	gene_9123	1.65327	0.00053358	uncharacterized LOC105831667	GIIIspla2
LOC105834755	-1.32554	8.36698e-09	gene_8756	-1.60601	3.91151e-05	GSK-3-binding protein	NA
LOC105838731	-1.10856	3.2988e-05	gene_144	-1.91915	1.64003e-06	class E basic helix-loop-helix protein 22%2C transcript variant X2	Oli
LOC105833908	1.09923	0.000634634	gene_11474	1.90814	1.27294e-12	elongation of very long chain fatty acids protein AAEL008004%2C transcript variant X2	CG33110
LOC105837614	1.22297	0.0236093	gene_7261	1.69747	0.00122262	protein takeout	CG14661
LOC105832626	1.08147	5.6218e-05	gene_461	1.90506	8.37991e-12	ketohexokinase%2C transcript variant X2	CG7551, CG12289, CG7328
LOC105839793	-1.72097	9.74928e-05	gene_4866	-1.19543	0.0151865	ELAV-like protein 3%2C transcript variant X15	elav, fne, Rbp9
LOC105828554	1.86758	5.06751e-06	gene_13740	1.1001	0.00232436	venom carboxylesterase-6%2C transcript variant X1	CG6414
LOC105834948	1.68682	7.24032e-11	gene_9372	1.201	0.0392647	uncharacterized LOC105834948%2C transcript variant X1	CG16820, CG5867, CG5945
LOC105835899	-1.54304	2.57683e-06	gene_2403	-1.31266	0.00161074	CUGBP Elav-like family member 4%2C transcript variant X6	bru3
LOC105836734	1.79355	7.33412e-09	gene_6053	1.12731	0.0242943	inositol monophosphatase 2	CG17028, CG17029
LOC105833048	1.4392	6.72494e-11	gene_4141	1.39594	4.12679e-09	putative fatty acyl-CoA reductase CG5065%2C transcript variant X1	CG1441
LOC105829835	-1.66602	9.27794e-09	gene_10305	-1.19064	4.96275e-05	3-phosphoinositide-dependent protein kinase 1%2C transcript variant X1	Pdk1
LOC105830746	-1.19341	3.52267e-05	gene_3303	-1.6589	7.74651e-06	alpha-tocopherol transfer protein%2C transcript variant X4	CG10026
LOC105839742	1.77034	1.54783e-05	gene_8594	1.11223	0.00179226	purine nucleoside phosphorylase%2C transcript variant X2	CG18128, CG16758
LOC105836683	1.0878	0.00152897	gene_6637	1.80752	1.31815e-05	prostaglandin E synthase	NA
LOC105839966	1.35569	5.95929e-07	gene_11278	1.38054	2.94257e-05	MFS-type transporter SLC18B1%2C transcript variant X2	NA
LOC105828913	-1.00139	1.38518e-05	gene_11547	-1.84906	3.54998e-08	uncharacterized LOC105828913	beat-Ib, beat-Ic, beat-Ia
LOC105839979	-1.01569	9.73092e-06	gene_12957	-1.79409	9.66203e-07	septin-2%2C transcript variant X2	2004-09-01
LOC105831888	1.22395	5.58325e-07	gene_9294	1.42232	0.000463679	uncharacterized LOC105831888	CG30380
LOC105837292	1.36051	0.000114856	gene_584	1.25164	0.000213101	uncharacterized LOC105837292	NA
LOC105835298	-1.09325	1.06342e-05	gene_10539	-1.54773	3.86639e-07	transmembrane protein 181%2C transcript variant X2	CG13409
LOC105828361	1.39594	3.66428e-06	gene_3301	1.16068	0.00031258	alpha-tocopherol transfer protein-like	CG5958
LOC105834864	-1.23542	4.17343e-06	gene_2102	-1.29469	4.40239e-06	segmentation protein Runt	run
LOC105839951	1.04252	0.000859259	gene_4353	1.45028	1.63614e-08	uncharacterized LOC105839951	CG3831, l_2_34Fd
LOC105831761	1.02507	0.00355517	gene_1537	1.39524	0.000379259	neurophysin 1	NA
LOC105828833	1.04328	0.000410057	gene_7053	1.3571	1.2298e-12	calcium/calmodulin-dependent protein kinase type 1%2C transcript variant X1	CaMKI
LOC105834887	1.20051	3.05768e-10	gene_7404	1.16532	7.11584e-07	muscle segmentation homeobox	Dr
LOC105830460	-1.19242	0.0374589	gene_1674	-1.15143	0.0430287	cytochrome P450 6k1%2C transcript variant X1	NA
LOC105832473	1.03078	0.0010142	gene_9484	1.3223	0.00107985	lipid storage droplets surface-binding protein 1%2C transcript variant X2	Lsd-1
LOC105835412	-1.03904	3.90993e-07	gene_6734	-1.27531	0.000153385	uncharacterized LOC105835412%2C transcript variant X1	CG15760
LOC105839381	1.08092	0.00498553	gene_11741	1.16059	0.0480565	uncharacterized LOC105839381%2C transcript variant X2	NA
LOC105839732	-1.13132	4.18507e-07	gene_3926	-1.02164	0.000530225	transcription factor Sox-2%2C transcript variant X5	SoxN
LOC105835798	-1.02646	0.012883	gene_4832	-1.08403	0.00610073	titin%2C transcript variant X1	tnc
LOC105836176	-1.08807	1.5898e-05	gene_14760	-1.02174	2.32833e-05	protein bric-a-brac 2%2C transcript variant X1	bab1, bab2
LOC105839505	1.05854	0.0104961	gene_730	1.04543	2.65452e-06	axonemal 84 kDa protein	CG15373
LOC105834520	-1.0037	0.000130965	gene_1579	-1.03342	1.13498e-06	nucleolysin TIAR%2C transcript variant X7	trv, CG34354

## Sheet: Pre pupa
GeneID (M.pharaonis, NCBI)	log2 Foldchange (M.pharaonis)	FDR adjusted pvalue (M.pharaonis)	GeneID (A.echinatior, in house)	log2 Foldchange (A.echinatior)	FDR adjusted pvalue (A.echinatior)	Gene name (NCBI)	Orthologs (D. melanogaster)
LOC105839887	5.8198	3.38135e-33	gene_3866	9.4608	3.02159e-27	uncharacterized LOC105839887%2C transcript variant X1	NA
LOC105839084	2.44434	3.50493e-13	gene_5127	4.28462	1.5168e-09	cytochrome P450 4g15	Cyp4g15
LOC105834545	2.83137	9.40477e-11	gene_9081	2.9879	0.028104	cytochrome P450 4g15	Cyp4g1
LOC105838675	1.78025	2.26603e-17	gene_2767	4.64882	9.32088e-13	pyrethroid hydrolase Ces2a	CG5397
LOC105839793	-2.21588	5.93574e-18	gene_4866	-3.41638	0.000147114	ELAV-like protein 3%2C transcript variant X15	elav, fne, Rbp9
LOC105838544	1.63259	3.86372e-09	gene_8461	4.55479	4.04927e-08	vasorin	NA
LOC105834317	1.36789	0.00037477	gene_11553	4.82432	2.24463e-08	peroxisomal hydratase-dehydrogenase-epimerase	Pdh, CG4842, CG18814
LOC105836368	-1.58753	8.99089e-20	gene_5729	-4.1318	7.36635e-07	uncharacterized LOC105836368%2C transcript variant X3	CG9919
LOC105836330	-1.8385	1.27895e-16	gene_14717	-3.51491	6.76169e-07	synaptotagmin 1%2C transcript variant X1	Syt1
LOC105827806	-1.92734	2.30424e-19	gene_10216	-3.34888	1.7573e-06	RE1-silencing transcription factor B%2C transcript variant X3	NA
LOC105836682	-2.03052	2.17664e-20	gene_6638	-3.14536	2.98921e-06	PI-PLC X domain-containing protein 1%2C transcript variant X6	CG5895
LOC105838856	-1.69349	1.77297e-15	gene_10941	-3.7076	3.72337e-05	pheromone-binding protein-related protein 6	NA
LOC105833690	1.17005	6.70233e-06	gene_1302	5.04965	7.14694e-13	spondin-1%2C transcript variant X2	fat-spondin
LOC105828138	1.52227	5.81316e-12	gene_2886	3.72601	2.06733e-06	uncharacterized LOC105828138%2C transcript variant X2	NA
LOC105835497	1.5906	6.22683e-12	gene_13507	3.50978	1.26476e-06	phenoloxidase 1	PPO3, PPO2, PPO1
LOC105837292	1.26858	0.000130435	gene_584	3.97388	0.000136741	uncharacterized LOC105837292	NA
LOC105834927	-1.70047	2.67683e-16	gene_12159	-2.90252	1.39512e-05	uncharacterized LOC105834927%2C transcript variant X3	NA
LOC105837236	1.06991	1.1418e-05	gene_8708	4.50191	1.46187e-12	D-aspartate oxidase	CG11236
LOC105828735	1.57948	1.21833e-10	gene_9143	2.87249	0.000697755	leucine-rich repeat transmembrane neuronal protein 4	NA
LOC105837629	2.2767	3.62661e-15	gene_7564	1.96385	0.0061911	neuroparsin-A	NA
LOC105836797	1.72735	3.05237e-14	gene_12931	2.5796	1.8285e-05	acyl-CoA synthetase short-chain family member 3%2C mitochondrial%2C transcript variant X2	CG6432
LOC105837631	1.69914	2.06896e-09	gene_7568	2.60175	4.52374e-06	4-coumarate--CoA ligase 1%2C transcript variant X2	CG6178
LOC105833958	-1.45914	1.86923e-13	gene_6594	-2.96891	5.54174e-06	paired box protein Pax-6%2C transcript variant X2	NA
LOC105836863	1.44263	4.58974e-08	gene_9081	2.9879	0.028104	cytochrome P450 4g15	Cyp4g1
LOC105835899	-2.05871	2.79818e-16	gene_2403	-2.0878	0.026406	CUGBP Elav-like family member 4%2C transcript variant X6	bru3
LOC105836669	-1.33984	0.00302673	gene_6525	-3.1894	3.90312e-09	sodium/calcium exchanger regulatory protein 1	NA
LOC105836624	-1.52152	1.11848e-14	gene_11053	-2.76739	1.16021e-06	leucine-rich repeat and immunoglobulin-like domain-containing nogo receptor-interacting protein 1%2C transcript variant X1	CG1504
LOC105836714	-2.16299	4.75734e-21	gene_15039	-1.9277	0.000263836	rho GTPase-activating protein 100F%2C transcript variant X11	RhoGAP100F
LOC105834122	-2.49616	2.311e-20	gene_5046	-1.61329	0.0215051	homeobox protein prospero%2C transcript variant X2	pros
LOC105829177	-1.16929	8.53421e-11	gene_9739	-3.34929	9.32088e-13	uncharacterized LOC105829177	Hasp
LOC105834520	-1.74966	8.33492e-17	gene_1579	-2.20081	0.00034252	nucleolysin TIAR%2C transcript variant X7	trv, CG34354
LOC105829082	-2.15265	9.99129e-13	gene_6797	-1.68903	0.0109636	1-phosphatidylinositol 4%2C5-bisphosphate phosphodiesterase epsilon-1%2C transcript variant X1	NA
LOC105831727	-1.64809	4.85227e-18	gene_5416	-2.13713	0.00775168	ras-related protein Rab-3%2C transcript variant X3	Rab3
LOC118644185	-1.56733	8.69508e-17	gene_15014	-2.19019	4.9978e-05	uncharacterized LOC118644185%2C transcript variant X2	CG3257
LOC105828913	-1.48234	2.85396e-16	gene_11547	-2.29499	0.0058106	uncharacterized LOC105828913	beat-Ib, beat-Ic, beat-Ia
LOC105840058	-1.49859	1.76201e-11	gene_15014	-2.19019	4.9978e-05	uncharacterized LOC105840058%2C transcript variant X2	CG3257
LOC105834117	-1.0988	1.12963e-15	gene_2030	-2.97148	1.74806e-05	synapsin%2C transcript variant X2	Syn
LOC105835544	1.47735	6.47585e-07	gene_4016	2.19891	0.0266996	tropomyosin-1	NA
LOC105832126	-1.67307	1.40453e-20	gene_9115	-1.94136	0.0166382	proline-rich protein 36%2C transcript variant X3	CG42726, scrt
LOC105832128	-1.70169	7.67128e-19	gene_10747	-1.89335	0.00597094	acid sphingomyelinase-like phosphodiesterase 3b	CG32052
LOC105836444	-1.9063	5.48951e-21	gene_5907	-1.67315	0.00774975	zwei Ig domain protein zig-8	dpr8
LOC105838731	-1.54867	5.02114e-22	gene_144	-2.02517	0.00180963	class E basic helix-loop-helix protein 22%2C transcript variant X2	Oli
LOC105836197	-1.76672	4.07498e-19	gene_12222	-1.7606	0.00137937	toll-like receptor 6	2mit
LOC105834715	-1.4581	4.7446e-12	gene_9394	-2.11852	0.000653738	uncharacterized LOC105834715%2C transcript variant X2	Fie
LOC118648777	-1.10244	0.00487123	gene_4951	-2.78884	0.005395	ecdysone-induced protein 78C-like	Eip78C
LOC105837328	1.06039	6.9982e-13	gene_11479	2.89213	0.0016705	defensin-2	Def
LOC105835376	1.48141	9.72402e-08	gene_8818	2.0646	0.00567508	synaptic vesicle glycoprotein 2B%2C transcript variant X3	CG3690, CG14691, CG31272
LOC105830339	-1.42599	2.56329e-13	gene_2401	-2.1445	8.92641e-05	tetraspanin-11%2C transcript variant X1	NA
LOC105829542	1.07486	3.30404e-12	gene_10203	2.82886	0.000637314	fatty-acid amide hydrolase 2-A	CG7910, CG7900
LOC105834094	-1.64338	3.4351e-15	gene_2811	-1.82804	0.00104379	uncharacterized protein CG3556-like	CG3556
LOC105838369	-1.55913	3.45652e-17	gene_3872	-1.91884	0.000496944	alpha-tubulin N-acetyltransferase	Tat, CG17003
LOC105830610	-1.37946	2.98375e-17	gene_5887	-2.11966	0.000786641	leucine-rich repeat%2C immunoglobulin-like domain and transmembrane domain-containing protein 2	kek1
LOC105837075	1.03696	9.03125e-06	gene_9531	2.81182	0.00812167	hemolymph lipopolysaccharide-binding protein	NA
LOC105839120	1.70894	1.09009e-14	gene_11995	1.67365	0.0424505	tubulin beta chain%2C transcript variant X2	betaTub60D
LOC105839757	1.93032	2.21541e-18	gene_13235	1.47057	0.039174	fatty acid synthase	FASN3
LOC105836187	-1.35526	3.06902e-10	gene_14116	-2.05686	0.0021816	paired box protein Pax-5%2C transcript variant X1	sv
LOC105838293	-1.14271	3.49419e-12	gene_8198	-2.43332	4.55191e-05	RNA-binding protein Musashi homolog Rbp6%2C transcript variant X3	Rbp6
LOC105838572	-1.59133	6.14351e-19	gene_686	-1.72394	0.00118452	uncharacterized LOC105838572	NA
LOC105830998	-1.39299	1.0482e-17	gene_15170	-1.94348	0.000173604	uncharacterized LOC105830998%2C transcript variant X2	CG31191
LOC105838413	1.27513	5.86402e-20	gene_7690	2.12262	8.08638e-05	uncharacterized LOC105838413%2C transcript variant X2	CG5854
LOC105835728	-1.52597	9.19375e-13	gene_2801	-1.76162	0.0075374	dipeptidase 1	NA
LOC105839670	1.07664	4.04507e-06	gene_11929	2.44948	0.00166074	peptidoglycan-recognition protein 2	PGRP-SA
LOC105839980	1.33167	2.23742e-14	gene_12956	1.97221	0.00422219	fructose-1%2C6-bisphosphatase 1	fbp
LOC105839506	2.124	1.0494e-22	gene_536	1.21984	0.0382055	fatty acyl-CoA reductase 1	CG4020
LOC105831357	-1.40059	3.24397e-14	gene_5112	-1.82987	0.0347797	uncharacterized LOC105831357%2C transcript variant X2	CG12994, CG17193
LOC105839994	1.36949	2.6785e-07	gene_6006	1.83622	0.0392606	smoothelin-like protein 2	CG34417
LOC118645681	1.11349	2.23806e-06	gene_263	2.25753	0.00923167	uncharacterized LOC118645681	NA
LOC105838638	-1.08683	4.21477e-08	gene_14716	-2.29959	5.26347e-05	uncharacterized LOC105838638	7B2
LOC105837144	1.06313	9.93458e-07	gene_12019	2.33006	0.0133709	hexokinase-1	NA
LOC105831663	-1.04337	3.72306e-20	gene_6176	-2.36521	1.05849e-07	uncharacterized LOC105831663%2C transcript variant X1	NA
LOC105839313	1.09324	3.48388e-10	gene_12654	2.24556	0.00204343	uncharacterized LOC105839313%2C transcript variant X2	CG31248
LOC105827796	1.65723	2.98469e-17	gene_10213	1.47823	0.032238	neurochondrin homolog	Neurochondrin
LOC105837836	-1.40626	4.45264e-15	gene_1003	-1.711	5.10391e-05	potassium voltage-gated channel protein Shab%2C transcript variant X3	Shab
LOC105829984	1.13247	7.03962e-07	gene_11469	2.1011	0.0232035	elongation of very long chain fatty acids protein	NA
LOC105834909	-1.77525	3.08474e-16	gene_12830	-1.32962	0.00180963	calcium-dependent secretion activator%2C transcript variant X2	Cadps
LOC105829178	-1.30909	1.06759e-15	gene_653	-1.789	0.0208946	IDLSRF-like peptide%2C transcript variant X1	CG31221
LOC105830989	-1.65088	2.93553e-17	gene_14619	-1.35607	0.00116626	vesicular glutamate transporter 1	VGlut
LOC105839158	-1.69923	2.32286e-11	gene_13606	-1.30713	0.0286874	synaptotagmin-4	Syt4
LOC105829535	1.21676	2.22507e-10	gene_13372	1.80981	0.000116749	lymphocyte cytosolic protein 2%2C transcript variant X2	NA
LOC105837307	-1.55074	8.75266e-19	gene_14348	-1.40175	0.00601898	ankyrin-3%2C transcript variant X3	NA
LOC105835220	-1.40071	5.2681e-13	gene_7144	-1.52142	0.00599608	neuronal acetylcholine receptor subunit alpha-7%2C transcript variant X2	nAChRalpha6
LOC105836443	-1.43298	1.79441e-17	gene_5898	-1.48524	9.48563e-05	protein O-mannosyl-transferase TMTC1%2C transcript variant X1	NA
LOC105836926	-1.69623	3.80439e-11	gene_9988	-1.237	0.0430463	basement membrane-specific heparan sulfate proteoglycan core protein%2C transcript variant X3	dpr7
LOC105832719	-1.44974	2.19451e-13	gene_9934	-1.4094	0.023662	anoctamin-8%2C transcript variant X3	CG15270
LOC105837310	-1.09955	7.99561e-11	gene_13963	-1.84822	0.00139767	protein PBDC1	CG7519
LOC105838102	-1.70474	4.40582e-16	gene_1670	-1.18979	0.00275134	LIM domain only protein 3%2C transcript variant X1	Bx
LOC105835821	-1.05205	3.51721e-10	gene_8183	-1.91347	0.0146538	uncharacterized LOC105835821	NA
LOC105838582	-1.26827	8.21385e-16	gene_2396	-1.58472	0.000960324	transcription initiation factor TFIID subunit 8	Taf8
LOC105832020	-1.64998	5.29194e-17	gene_14176	-1.21795	0.00492581	diacylglycerol kinase theta%2C transcript variant X10	CG31140
LOC105831134	-1.58965	6.8734e-16	gene_12698	-1.25351	0.0126271	glutamate-gated chloride channel%2C transcript variant X3	GluClalpha
LOC105839417	1.08744	3.10175e-11	gene_5064	1.82751	0.00281929	bifunctional purine biosynthesis protein ATIC	CG11089
LOC114254516	-1.08914	3.04037e-11	gene_13116	-1.8088	0.0228203	uncharacterized LOC114254516	NA
LOC105839940	-1.34146	1.88752e-18	gene_9819	-1.45528	0.000335862	peptidyl-alpha-hydroxyglycine alpha-amidating lyase 1	Pal1
LOC105833842	-1.02496	4.19011e-14	gene_8800	-1.86176	0.012162	uncharacterized LOC105833842%2C transcript variant X3	NA
LOC105838613	1.03045	1.18313e-10	gene_6100	1.80903	7.48313e-06	C-factor	sni
LOC105832981	-1.23861	4.05887e-17	gene_4023	-1.49338	0.00234743	transcription factor Sp9%2C transcript variant X2	Sp1
LOC105832304	-1.3894	3.21335e-12	gene_8158	-1.32929	9.23669e-05	uncharacterized LOC105832304%2C transcript variant X1	CG13532, CG5597
LOC105838773	-1.36824	1.02381e-13	gene_15045	-1.3471	0.000924606	cationic amino acid transporter 2%2C transcript variant X2	CG12531
LOC105837456	-1.21749	3.87656e-14	gene_6753	-1.51231	0.0384339	sodium/potassium-transporting ATPase subunit beta-2	nrv3
LOC105831151	-1.35071	3.98672e-20	gene_9737	-1.34973	0.00538487	POU domain%2C class 6%2C transcription factor 1%2C transcript variant X1	pdm3
LOC105835803	-1.27612	5.39496e-20	gene_7988	-1.41774	9.41357e-05	popeye domain-containing protein 3%2C transcript variant X1	NA
LOC105835820	-1.34905	5.08451e-18	gene_7987	-1.32617	0.0056673	uncharacterized LOC105835820%2C transcript variant X5	NA
LOC118644033	1.38653	4.2139e-09	gene_3755	1.28245	0.0024409	pyruvate carboxylase%2C mitochondrial-like	PCB
LOC105834429	-1.35196	6.34419e-11	gene_7434	-1.31345	0.00235508	photoreceptor-specific nuclear receptor%2C transcript variant X2	Hr51
LOC105830662	-1.12572	6.52854e-10	gene_14868	-1.54694	0.00171002	gamma-aminobutyric acid type B receptor subunit 2	GABA-B-R2
LOC105836344	-1.25933	2.79254e-12	gene_12562	-1.3376	0.01635	apical junction component 1 homolog%2C transcript variant X2	CG42748
LOC105838403	-1.47004	1.41972e-20	gene_7642	-1.12632	0.00629696	uncharacterized LOC105838403%2C transcript variant X2	NA
LOC105832617	-1.59014	9.7555e-14	gene_6617	-1.01136	0.0365049	G-protein coupled receptor 52%2C transcript variant X3	DopEcR
LOC105830858	-1.44521	2.9255e-21	gene_5993	-1.10646	0.00632463	kinesin-like protein unc-104%2C transcript variant X8	unc-104
LOC105838874	-1.17578	8.79942e-14	gene_9752	-1.35881	0.00445971	DNA-binding protein D-ETS-3	Ets65A
LOC105837690	-1.24984	5.36876e-19	gene_9034	-1.24275	0.0210948	high affinity choline transporter 1	NA
LOC114254004	1.18053	1.07436e-10	gene_7148	1.31489	0.000613562	uncharacterized LOC114254004%2C transcript variant X3	NA
LOC105830034	-1.39745	1.22103e-18	gene_12960	-1.07962	0.0168059	muscarinic acetylcholine receptor DM1%2C transcript variant X2	mAChR-A
LOC105834886	1.11637	1.47032e-19	gene_7076	1.34638	0.00283836	uncharacterized LOC105834886	NA
LOC105828392	-1.09028	1.02634e-16	gene_1150	-1.36406	9.20044e-05	phospholipid phosphatase 5	CG12746
LOC105833611	1.05092	1.30705e-14	gene_10730	1.30167	0.00563974	eukaryotic translation initiation factor 4E-binding protein 2	Thor
LOC105832483	-1.11267	4.88692e-11	gene_6372	-1.20862	0.0045756	uncharacterized LOC105832483%2C transcript variant X3	CG7369
LOC105829978	1.00671	2.95078e-10	gene_11176	1.31688	0.046306	alpha/beta hydrolase domain-containing protein 17B	CG33096
LOC105839353	-1.0853	7.66015e-09	gene_13197	-1.20114	0.0043829	Down syndrome cell adhesion molecule-like protein Dscam2%2C transcript variant X2	Dscam4
LOC105832943	1.00994	4.05153e-10	gene_11781	1.27735	0.000521218	NADH dehydrogenase [ubiquinone] flavoprotein 1%2C mitochondrial	ND-51, ND-51L2, ND-51L1
LOC105830938	1.07784	7.04861e-07	gene_7142	1.18967	0.0476789	dTTP/UTP pyrophosphatase	CG9515
LOC118644731	-1.02511	1.161e-11	gene_6367	-1.23277	0.00492647	uncharacterized LOC118644731%2C transcript variant X3	NA
LOC105832968	-1.05577	2.62478e-11	gene_1117	-1.17792	2.26681e-06	dipeptidyl aminopeptidase-like protein 6%2C transcript variant X2	CG11319
LOC105830447	-1.18269	1.51714e-16	gene_5896	-1.02709	5.47175e-05	beta-1%2C4-glucuronyltransferase 1	CG3253

## Sheet: Early pupa
GeneID (M.pharaonis, NCBI)	log2 Foldchange (M.pharaonis)	FDR adjusted pvalue (M.pharaonis)	GeneID (A.echinatior, in house)	log2 Foldchange (A.echinatior)	FDR adjusted pvalue (A.echinatior)	Gene name (NCBI)	Orthologs (D. melanogaster)
LOC105839887	7.18952	5.12882e-33	gene_3866	8.14313	1.3154e-35	uncharacterized LOC105839887%2C transcript variant X1	NA
LOC105833997	3.22321	1.75043e-16	gene_2834	4.4047	4.99678e-20	tropomyosin-2%2C transcript variant X1	Tm2
LOC105835909	2.81823	2.6209e-06	gene_2405	4.90606	2.91237e-13	myosin light chain alkali%2C transcript variant X1	Mlc1
LOC105829939	-2.4167	2.062e-14	gene_6466	-4.53248	3.27484e-21	pollen-specific leucine-rich repeat extensin-like protein 1	NA
LOC105837944	-2.47034	3.08516e-17	gene_1391	-4.36018	1.0474e-15	uncharacterized LOC105837944%2C transcript variant X6	NA
LOC105829082	-3.24863	3.73197e-14	gene_6797	-3.23632	5.96094e-15	1-phosphatidylinositol 4%2C5-bisphosphate phosphodiesterase epsilon-1%2C transcript variant X1	NA
LOC105833863	1.78852	2.67873e-05	gene_8805	5.56595	5.17451e-13	skin secretory protein xP2	NA
LOC105829883	2.69222	0.00286065	gene_8980	3.66812	0.000103817	uncharacterized LOC105829883	CG31997
LOC105835740	2.65525	5.76321e-13	gene_14141	3.52408	1.89302e-14	actin%2C muscle	Act88F, Act57B, Act87E
LOC105839120	2.02969	1.08965e-10	gene_11995	4.40596	5.49463e-18	tubulin beta chain%2C transcript variant X2	betaTub60D
LOC105835497	1.45685	0.000111557	gene_13507	6.13696	2.90823e-24	phenoloxidase 1	PPO3, PPO2, PPO1
LOC105837328	1.16784	7.17182e-11	gene_11479	7.20966	1.26509e-18	defensin-2	Def
LOC105835488	1.92918	3.21583e-07	gene_2806	4.29747	3.69554e-13	myosin regulatory light chain 2	Mlc2
LOC118645681	1.71638	1.22007e-09	gene_263	4.77405	4.83363e-15	uncharacterized LOC118645681	NA
LOC118646539	-1.81947	3.60892e-05	gene_5045	-4.45331	3.20285e-14	uncharacterized LOC118646539	NA
LOC105836580	2.15056	0.0236591	gene_11369	3.75954	0.00451124	flexible cuticle protein 12	Acp65Aa, Cpr65Av, Cpr65Aw, Cpr65Ax1, Cpr65Ax2, Lcp65Ad, Lcp65Ac, Lcp65Ae, Lcp65Ag3, Lcp65Ag2, Lcp65Ag1, Lcp65Af, Lcp65Aa
LOC118647048	3.04069	3.982e-17	gene_12139	2.60131	1.74119e-13	glutathione S-transferase-like%2C transcript variant X2	GstS1
LOC105834122	-2.63839	1.32499e-14	gene_5046	-2.95198	6.37369e-14	homeobox protein prospero%2C transcript variant X2	pros
LOC105835806	-1.99524	3.72185e-14	gene_7990	-3.78562	1.12502e-21	disintegrin and metalloproteinase domain-containing protein 11%2C transcript variant X15	mmd
LOC105837761	-2.54324	9.36393e-07	gene_14272	-2.93414	6.67416e-09	hormone receptor 4%2C transcript variant X15	Hr4
LOC105827796	2.34654	8.16009e-14	gene_10213	3.1707	1.56958e-18	neurochondrin homolog	Neurochondrin
LOC105831647	2.62516	2.44871e-07	gene_501	2.66887	1.45786e-09	troponin C%2C isoallergen Bla g 6.0301%2C transcript variant X1	TpnC73F, TpnC47D
LOC105836015	3.397	0.00543255	gene_8378	2.03415	0.0249724	probable salivary secreted peptide	CG34026, CG33998
LOC105836926	-2.20509	1.03817e-10	gene_9988	-3.09284	6.78791e-14	basement membrane-specific heparan sulfate proteoglycan core protein%2C transcript variant X3	dpr7
LOC105834854	-2.52141	4.1393e-15	gene_8477	-2.7004	5.90594e-14	proton channel OtopLc%2C transcript variant X8	OtopLa
LOC105835213	-1.93857	9.60044e-10	gene_11076	-3.35417	2.10888e-18	protein unc-79 homolog%2C transcript variant X4	unc79
LOC105837052	2.66693	0.000259096	gene_13240	2.43241	7.80496e-05	uncharacterized LOC105837052	NA
LOC105834274	-2.30646	1.24661e-18	gene_691	-2.74992	2.13724e-19	proteoglycan 4%2C transcript variant X15	CG17816
LOC105832126	-1.71977	4.17877e-17	gene_9115	-3.66943	5.49599e-15	proline-rich protein 36%2C transcript variant X3	CG42726, scrt
LOC105839793	-2.43747	5.44235e-16	gene_4866	-2.54238	5.5279e-08	ELAV-like protein 3%2C transcript variant X15	elav, fne, Rbp9
LOC118648799	-2.12791	1.07978e-06	gene_3168	-2.89714	8.68014e-16	probable G-protein coupled receptor CG31760%2C transcript variant X3	CG31760
LOC105838856	-2.83621	2.9146e-15	gene_10941	-2.16702	2.01216e-06	pheromone-binding protein-related protein 6	NA
LOC105838013	1.95746	0.0438611	gene_10490	3.12832	1.3958e-07	uncharacterized LOC105838013	Cpr97Ea
LOC105832775	-2.40622	1.66067e-14	gene_13835	-2.5078	1.13491e-11	complexin%2C transcript variant X2	cpx
LOC105831332	-1.39415	7.85728e-07	gene_2409	-4.27243	5.65602e-16	collagen alpha chain CG42342%2C transcript variant X5	CG42342
LOC105834162	-2.25494	6.04033e-15	gene_3810	-2.63993	1.38824e-12	SPEG neighbor protein	dpr21
LOC105832719	-2.04175	1.80305e-16	gene_9934	-2.91205	6.64001e-14	anoctamin-8%2C transcript variant X3	CG15270
LOC105839468	-1.91311	1.69566e-13	gene_7266	-3.10655	3.37265e-14	ELKS/Rab6-interacting/CAST family member 1%2C transcript variant X7	brp
LOC105832322	1.27209	1.90606e-05	gene_6224	4.63536	3.04116e-11	muscle LIM protein Mlp84B%2C transcript variant X2	Mlp84B, Mlp60A
LOC105835899	-2.49528	1.40466e-13	gene_2403	-2.35928	4.35259e-09	CUGBP Elav-like family member 4%2C transcript variant X6	bru3
LOC105832032	2.75282	9.88157e-12	gene_11686	2.13331	1.79934e-12	uncharacterized LOC105832032	NA
LOC105828751	3.93904	0.000458093	gene_3293	1.48623	0.0125057	uncharacterized LOC105828751	NA
LOC105840398	1.7492	9.84827e-08	gene_8889	3.28545	1.60768e-14	uncharacterized LOC105840398	spz
LOC105839323	-2.11863	3.89532e-12	gene_3981	-2.68199	3.61707e-15	gamma-aminobutyric acid receptor subunit beta%2C transcript variant X4	Rdl
LOC105836330	-2.02846	2.9146e-15	gene_14717	-2.79469	6.67481e-16	synaptotagmin 1%2C transcript variant X1	Syt1
LOC105834130	1.76535	0.00040059	gene_11004	3.18652	1.58169e-14	glycine-rich cell wall structural protein 1.8%2C transcript variant X2	NA
LOC105837479	-1.90794	3.535e-16	gene_11213	-2.93081	5.3945e-19	uncharacterized LOC105837479%2C transcript variant X6	NA
LOC105839501	1.956	9.62565e-13	gene_7464	2.8237	3.43579e-18	uncharacterized LOC105839501%2C transcript variant X2	nord
LOC105837335	-1.79442	1.62291e-11	gene_10472	-3.03997	7.66594e-17	uncharacterized LOC105837335	CG40498
LOC105836624	-2.13615	3.11454e-17	gene_11053	-2.51201	1.09646e-13	leucine-rich repeat and immunoglobulin-like domain-containing nogo receptor-interacting protein 1%2C transcript variant X1	CG1504
LOC105834903	1.93919	3.60186e-09	gene_10983	2.75489	2.10759e-20	uncharacterized LOC105834903	NA
LOC105827806	-2.39937	6.1174e-18	gene_10216	-2.20284	2.73497e-11	RE1-silencing transcription factor B%2C transcript variant X3	NA
LOC105837076	-2.25118	2.18777e-15	gene_9530	-2.31969	4.0736e-10	guanine nucleotide-binding protein subunit gamma-e	Ggamma30A
LOC105837629	3.15539	6.69863e-13	gene_7564	1.64476	4.65518e-08	neuroparsin-A	NA
LOC105829026	-1.37934	3.85868e-11	gene_10256	-3.76161	1.32273e-16	nephrin%2C transcript variant X1	side-III
LOC105830610	-1.81325	2.87814e-14	gene_5887	-2.84171	4.53928e-14	leucine-rich repeat%2C immunoglobulin-like domain and transmembrane domain-containing protein 2	kek1
LOC105835728	-2.03453	4.32388e-15	gene_2801	-2.50706	1.90741e-17	dipeptidase 1	NA
LOC105832970	-2.08479	1.57369e-17	gene_8248	-2.43952	6.60862e-16	centrosomal protein of 164 kDa%2C transcript variant X1	CG9170
LOC105829993	-1.80083	4.50237e-11	gene_2698	-2.80536	1.90711e-16	peroxidasin homolog	dpr6
LOC105837552	3.21037	2.3438e-10	gene_10787	1.5662	2.60932e-05	ribonuclease H%2C transcript variant X1	NA
LOC105834520	-2.21947	1.25586e-14	gene_1579	-2.25846	3.89207e-15	nucleolysin TIAR%2C transcript variant X7	trv, CG34354
LOC105833958	-1.81745	5.46886e-13	gene_6594	-2.67294	7.28834e-09	paired box protein Pax-6%2C transcript variant X2	NA
LOC105836016	2.37119	7.04309e-05	gene_8378	2.03415	0.0249724	probable salivary secreted peptide	CG34026, CG33998
LOC105840129	-2.06362	2.17188e-09	gene_13071	-2.3357	1.82138e-09	uncharacterized LOC105840129%2C transcript variant X1	St3
LOC105833003	1.41074	3.87406e-06	gene_10358	3.39922	8.51649e-15	cyclin-dependent kinases regulatory subunit	Cks30A
LOC105829980	-1.4925	2.12321e-14	gene_7195	-3.20504	1.56958e-18	carbonic anhydrase-related protein 10%2C transcript variant X1	CARPB
LOC105839469	1.54354	1.60752e-09	gene_6941	3.09229	5.69423e-06	beta-hexosaminidase subunit beta	NA
LOC105836714	-2.43933	4.07793e-18	gene_15039	-1.93341	9.58302e-14	rho GTPase-activating protein 100F%2C transcript variant X11	RhoGAP100F
LOC105831727	-1.76093	3.18574e-17	gene_5416	-2.67304	2.56427e-17	ras-related protein Rab-3%2C transcript variant X3	Rab3
LOC105836368	-1.59474	5.37075e-15	gene_5729	-2.92674	3.39893e-16	uncharacterized LOC105836368%2C transcript variant X3	CG9919
LOC105835220	-1.95852	1.3532e-11	gene_7144	-2.3812	1.36179e-17	neuronal acetylcholine receptor subunit alpha-7%2C transcript variant X2	nAChRalpha6
LOC105837075	1.40529	1.19412e-09	gene_9531	3.31579	0.00140677	hemolymph lipopolysaccharide-binding protein	NA
LOC105839745	2.04425	3.55626e-09	gene_8988	2.27913	3.36111e-11	aldehyde dehydrogenase%2C mitochondrial%2C transcript variant X1	Aldh
LOC105829177	-2.42699	1.21573e-14	gene_9739	-1.90973	1.23234e-13	uncharacterized LOC105829177	Hasp
LOC105832518	1.50715	0.00156341	gene_13647	3.04913	7.99685e-08	ornithine aminotransferase%2C mitochondrial%2C transcript variant X1	NA
LOC105830034	-1.742	2.63048e-14	gene_12960	-2.60505	3.43579e-18	muscarinic acetylcholine receptor DM1%2C transcript variant X2	mAChR-A
LOC105837530	-2.1022	1.43435e-15	gene_7606	-2.14083	2.21011e-16	protein still life%2C isoform SIF type 1%2C transcript variant X12	sif
LOC105833651	-2.05883	1.6746e-16	gene_8906	-2.16731	2.23569e-14	neuroligin-4%2C Y-linked%2C transcript variant X2	Nlg4
LOC105832020	-2.04245	2.53358e-14	gene_14176	-2.16875	3.19832e-18	diacylglycerol kinase theta%2C transcript variant X10	CG31140
LOC105836219	-1.72807	3.02569e-14	gene_12121	-2.55883	4.90559e-19	protein turtle%2C transcript variant X7	tutl
LOC105832617	-2.00459	5.38478e-15	gene_6617	-2.17703	3.04446e-11	G-protein coupled receptor 52%2C transcript variant X3	DopEcR
LOC105837925	-1.49844	9.06828e-13	gene_11108	-2.90705	6.35724e-18	uncharacterized LOC105837925	Mid1
LOC105830662	-1.7647	5.3923e-12	gene_14868	-2.4508	8.46896e-15	gamma-aminobutyric acid type B receptor subunit 2	GABA-B-R2
LOC105838792	-2.27704	3.02569e-14	gene_1311	-1.89522	3.26879e-12	dipeptidase 1%2C transcript variant X2	CG6154
LOC105835544	1.95812	0.003639	gene_4016	2.20094	4.28394e-07	tropomyosin-1	NA
LOC105836500	1.33362	0.0108223	gene_3306	3.22338	2.48412e-15	chitin deacetylase 1%2C transcript variant X1	verm
LOC105837060	1.89458	0.00227306	gene_13534	2.26741	2.47925e-05	uncharacterized LOC105837060%2C transcript variant X2	NA
LOC105839332	-1.71033	7.57704e-14	gene_12773	-2.51075	1.15239e-13	neural-cadherin%2C transcript variant X8	CadN2, CadN
LOC105836456	-1.67698	5.20294e-11	gene_1622	-2.55792	1.12566e-14	cytoplasmic polyadenylation element-binding protein 2	NA
LOC105834264	1.27654	0.000187499	gene_6610	3.356	3.22614e-12	paramyosin%2C long form	Prm
LOC105833704	-1.98011	1.95476e-11	gene_9732	-2.16275	1.86001e-06	protein couch potato%2C transcript variant X1	cpo
LOC105830464	-2.06206	5.42025e-18	gene_3956	-2.06076	7.96118e-13	multiple coagulation factor deficiency protein 2 homolog%2C transcript variant X2	CG12817
LOC118644176	1.63011	2.2584e-12	gene_12139	2.60131	1.74119e-13	glutathione S-transferase-like	GstS1
LOC118648666	-1.61583	2.80816e-11	gene_12225	-2.60057	1.05991e-13	uncharacterized LOC118648666%2C transcript variant X1	Ank
LOC105830814	1.51115	5.62701e-08	gene_3762	2.76017	6.5863e-13	L-lactate dehydrogenase	Ldh
LOC105828913	-1.70136	1.70986e-12	gene_11547	-2.43437	1.8251e-11	uncharacterized LOC105828913	beat-Ib, beat-Ic, beat-Ia
LOC105834578	-1.41658	1.50104e-08	gene_3168	-2.89714	8.68014e-16	probable G-protein coupled receptor CG31760%2C transcript variant X11	CG31760
LOC105835246	-1.61707	5.40573e-11	gene_4999	-2.53562	1.07455e-11	teneurin-a	Ten-a
LOC105834993	1.41155	3.82556e-07	gene_11182	2.89968	4.12626e-16	mitochondrial import receptor subunit TOM40 homolog 1	Tom40, tomboy40
LOC105836921	-1.39128	1.30607e-08	gene_13409	-2.94109	4.82032e-18	Down syndrome cell adhesion molecule-like protein Dscam2%2C transcript variant X5	NA
LOC105829243	-2.65518	1.21294e-05	gene_8928	-1.52082	0.000495866	uncharacterized LOC105829243	IRSp53
LOC105831134	-2.23665	4.5578e-15	gene_12698	-1.78453	3.98251e-13	glutamate-gated chloride channel%2C transcript variant X3	GluClalpha
LOC105829522	1.53249	0.00317912	gene_9685	2.57817	3.6261e-07	muscle-specific protein 20	CG5023
LOC105830374	3.82728	0.000775399	gene_13894	1.02727	0.022243	pupal cuticle protein C1B	NA
LOC105831029	1.065	2.58501e-09	gene_4992	3.64006	1.5405e-17	protein mab-21	CG4766
LOC105834146	1.64758	0.0067683	gene_11872	2.33375	0.00563095	pollen-specific leucine-rich repeat extensin-like protein 4	TwdlE
LOC105836478	1.74406	4.06149e-06	gene_4114	2.15544	8.36686e-08	tetraspanin-2A	Tsp2A
LOC105833050	1.76776	9.45472e-06	gene_4132	2.12136	4.05283e-07	slit homolog 1 protein	CG5096
LOC105839611	-1.76145	1.07778e-17	gene_9302	-2.12484	4.58649e-16	zinc finger protein 853%2C transcript variant X2	CG12605
LOC105836444	-2.1365	4.3673e-17	gene_5907	-1.72534	5.47125e-07	zwei Ig domain protein zig-8	dpr8
LOC105833988	-1.6288	1.5599e-09	gene_3299	-2.25028	8.79404e-10	immunoglobulin domain-containing protein oig-4	nkt
LOC105838032	-1.37287	2.15467e-10	gene_9978	-2.66767	1.2622e-20	uncharacterized LOC105838032%2C transcript variant X2	CG4133
LOC105831633	1.06007	0.00028889	gene_9927	3.44568	4.74208e-12	serine/arginine repetitive matrix protein 2%2C transcript variant X2	NA
LOC105837836	-1.5278	7.58803e-11	gene_1003	-2.36098	1.25445e-14	potassium voltage-gated channel protein Shab%2C transcript variant X3	Shab
LOC105839829	1.67717	2.17441e-07	gene_13201	2.1479	4.90328e-08	cyclin-dependent kinase 1%2C transcript variant X1	Cdk1
LOC105838187	-1.97193	7.40091e-15	gene_4167	-1.81439	3.41782e-09	voltage-dependent calcium channel subunit alpha-2/delta-4%2C transcript variant X1	CG4587
LOC105838359	-1.44672	2.15467e-10	gene_10240	-2.45973	3.73627e-11	potassium voltage-gated channel protein Shaker%2C transcript variant X7	Sh
LOC105838788	1.50845	0.00158666	gene_15044	2.33057	6.90434e-10	protein obstructor-E	obst-E
LOC105837332	-1.68004	7.42115e-14	gene_2827	-2.06698	1.11946e-12	ras-specific guanine nucleotide-releasing factor 2%2C transcript variant X3	NA
LOC105834813	-1.58617	8.07832e-14	gene_11625	-2.18826	8.58867e-15	regulating synaptic membrane exocytosis protein 2%2C transcript variant X1	Rim
LOC105836977	1.09144	4.40541e-12	gene_4151	3.17384	1.28863e-17	heat shock protein 60A%2C transcript variant X4	Hsp60D, Hsp60B, Hsp60C, Hsp60A
LOC105835380	1.62049	7.37977e-06	gene_2896	2.13476	6.12995e-12	myosin heavy chain%2C muscle%2C transcript variant X27	Mhc
LOC105832864	-1.05195	4.72954e-12	gene_10473	-3.28116	6.49751e-20	uncharacterized LOC105832864	NA
LOC105831357	-1.95253	3.21997e-15	gene_5112	-1.76648	0.00102923	uncharacterized LOC105831357%2C transcript variant X2	CG12994, CG17193
LOC105829354	-1.87649	9.41779e-17	gene_5091	-1.83691	5.94251e-07	uncharacterized LOC105829354%2C transcript variant X1	CG14321
LOC105837456	-1.7506	7.33323e-15	gene_6753	-1.92828	1.09189e-11	sodium/potassium-transporting ATPase subunit beta-2	nrv3
LOC105836682	-2.24383	8.61022e-15	gene_6638	-1.50419	8.96516e-09	PI-PLC X domain-containing protein 1%2C transcript variant X6	CG5895
LOC105838572	-2.20912	9.26912e-17	gene_686	-1.51867	1.02037e-10	uncharacterized LOC105838572	NA
LOC105836476	1.35798	0.0132372	gene_2671	2.46174	0.0153253	protein obstructor-E	NA
LOC105834595	-1.58106	6.34533e-12	gene_15029	-2.1083	9.08641e-07	major facilitator superfamily domain-containing protein 6%2C transcript variant X3	jef
LOC105835668	-1.27872	3.88115e-06	gene_12225	-2.60057	1.05991e-13	ankyrin-3%2C transcript variant X9	Ank
LOC105832474	1.09309	0.010234	gene_9483	3.0219	3.01964e-10	lipid storage droplets surface-binding protein 2	Lsd-2
LOC105836443	-1.85596	3.43874e-16	gene_5898	-1.77682	5.79976e-13	protein O-mannosyl-transferase TMTC1%2C transcript variant X1	NA
LOC105835641	-1.77551	8.16552e-10	gene_1832	-1.8434	4.27468e-15	acetylcholine receptor subunit alpha-like%2C transcript variant X2	nAChRalpha4
LOC105830016	1.75178	0.000229586	gene_1562	1.85968	1.38492e-05	uncharacterized LOC105830016	sosie
LOC105837619	2.08587	0.000760273	gene_7182	1.56047	0.0209796	transcription factor SPT20 homolog%2C transcript variant X5	CG14687
LOC105839353	-1.86796	5.06799e-11	gene_13197	-1.74221	2.05604e-13	Down syndrome cell adhesion molecule-like protein Dscam2%2C transcript variant X2	Dscam4
LOC105832254	1.50466	0.00087599	gene_1460	2.15393	3.84699e-09	uncharacterized LOC105832254	Spn27A
LOC105840058	-1.71895	1.00982e-06	gene_15014	-1.87522	8.99835e-11	uncharacterized LOC105840058%2C transcript variant X2	CG3257
LOC105829940	-1.93755	1.44161e-08	gene_6467	-1.65331	1.64523e-08	cyclin-dependent kinase 5 activator 1	Cdk5alpha
LOC105837217	-2.17072	5.5651e-17	gene_10661	-1.47506	0.000159873	uncharacterized LOC105837217%2C transcript variant X3	NA
LOC105829370	-1.48591	2.97323e-10	gene_11638	-2.14098	4.40971e-08	uncharacterized LOC105829370	jeb
LOC118647052	1.21896	7.94318e-07	gene_12139	2.60131	1.74119e-13	glutathione S-transferase-like	GstS1
LOC105836374	-1.53655	4.5578e-15	gene_4101	-2.0521	3.8169e-13	neurotrimin	dpr11
LOC105837724	1.3082	0.0157201	gene_3257	2.40816	8.97539e-13	MYG1 exonuclease%2C transcript variant X4	CG11980
LOC105830790	-1.7859	9.56286e-16	gene_10957	-1.75957	1.25263e-14	glucose transporter type 1%2C transcript variant X6	Glut1
LOC105839255	-1.60252	2.85464e-07	gene_7930	-1.95625	1.37133e-07	uncharacterized LOC105839255	CG6216
LOC105837307	-1.28373	6.73282e-14	gene_14348	-2.42722	7.47872e-15	ankyrin-3%2C transcript variant X3	NA
LOC105834429	-1.98859	1.63137e-12	gene_7434	-1.56607	9.49161e-06	photoreceptor-specific nuclear receptor%2C transcript variant X2	Hr51
LOC105837311	1.86755	0.00514525	gene_13322	1.66407	0.037869	uncharacterized LOC105837311	CG9812
LOC105833897	-1.10761	1.62291e-11	gene_6455	-2.79303	8.04608e-17	insulin receptor substrate 1%2C transcript variant X4	chico
LOC105840124	-1.80882	1.40466e-13	gene_944	-1.70779	5.25589e-12	protein nervous wreck%2C transcript variant X2	nwk
LOC105838933	1.11182	1.74316e-09	gene_6180	2.76966	1.1866e-18	catalase%2C transcript variant X1	CG9314, Cat
LOC105837708	1.05037	2.24176e-05	gene_3905	2.92976	2.10352e-15	EF-hand domain-containing protein D2 homolog%2C transcript variant X1	Swip-1
LOC105829103	-1.43863	2.06125e-06	gene_10682	-2.11148	1.29633e-11	longitudinals lacking protein%2C isoforms H/M/V%2C transcript variant X2	NA
LOC105836014	1.48753	0.000723463	gene_8378	2.03415	0.0249724	probable salivary secreted peptide	CG34026, CG33998
LOC105833530	-1.70986	1.99645e-13	gene_8399	-1.76152	0.00141248	regulator of G-protein signaling 17%2C transcript variant X4	Dhit
LOC105829207	1.68032	0.000121907	gene_3305	1.76642	1.05496e-05	chitin deacetylase 1%2C transcript variant X2	serp
LOC118648275	-1.0222	1.79297e-11	gene_3168	-2.89714	8.68014e-16	probable G-protein coupled receptor CG31760%2C transcript variant X3	CG31760
LOC105836964	-1.0823	3.99369e-07	gene_6040	-2.72739	3.22563e-08	GTPase-activating Rap/Ran-GAP domain-like protein 3%2C transcript variant X2	NA
LOC105839417	1.682	3.95545e-07	gene_5064	1.74039	3.42836e-05	bifunctional purine biosynthesis protein ATIC	CG11089
LOC105828545	1.25066	1.79271e-05	gene_7686	2.31961	6.67614e-08	GDP-fucose protein O-fucosyltransferase 1	O-fut1
LOC105839343	-1.87818	8.9251e-16	gene_4034	-1.5353	1.16659e-10	putative mediator of RNA polymerase II transcription subunit 26	NA
LOC105830055	-1.04951	9.62874e-11	gene_1377	-2.74265	3.07827e-17	uncharacterized LOC105830055	Actbeta
LOC105836717	1.402	1.38289e-06	gene_15041	2.04561	8.92334e-10	protein twist%2C transcript variant X3	twi
LOC118645209	-1.31458	1.60269e-10	gene_9898	-2.16343	3.96158e-10	uncharacterized LOC118645209	NA
LOC105829494	1.73706	4.0997e-05	gene_11957	1.63542	1.62538e-07	40S ribosomal protein S28	RpS28a
LOC105840776	1.0709	7.3779e-07	gene_4456	2.63892	2.01454e-11	protein singles bar%2C transcript variant X5	sing
LOC105835662	2.43792	0.000175884	gene_696	1.15725	9.23132e-08	sodium/potassium/calcium exchanger 4	zyd
LOC105830937	1.49349	0.000525312	gene_7139	1.88796	0.000527059	endocuticle structural glycoprotein ABD-4	NA
LOC105838731	-1.38238	1.13416e-13	gene_144	-2.02783	9.41854e-07	class E basic helix-loop-helix protein 22%2C transcript variant X2	Oli
LOC105836505	-1.18143	1.72839e-16	gene_8715	-2.37017	3.51682e-19	uncharacterized LOC105836505	CG16779
LOC105831028	1.46998	1.30572e-05	gene_4993	1.89986	9.70713e-08	protein mab-21	mab-21
LOC105831496	-1.35612	3.84159e-06	gene_7614	-2.0054	2.51457e-07	sex determination protein fruitless%2C transcript variant X11	NA
LOC105830858	-1.48544	4.12308e-15	gene_5993	-1.82092	3.67938e-16	kinesin-like protein unc-104%2C transcript variant X8	unc-104
LOC105835086	-1.02481	3.85673e-07	gene_11922	-2.63741	1.11298e-16	uncharacterized LOC105835086%2C transcript variant X2	Hers
LOC105832136	-1.46044	8.17947e-05	gene_8247	-1.84832	7.80776e-11	disheveled-associated activator of morphogenesis 1%2C transcript variant X2	DAAM
LOC105828325	1.39963	1.56417e-07	gene_13279	1.92379	2.79845e-10	rRNA 2'-O-methyltransferase fibrillarin	CG10909
LOC105830753	-2.16505	1.6536e-13	gene_1342	-1.23164	3.13779e-07	serine/threonine-protein kinase BRSK2%2C transcript variant X2	sff
LOC105833358	-1.58535	1.82314e-09	gene_541	-1.68049	3.24505e-09	43 kDa receptor-associated protein of the synapse homolog%2C transcript variant X2	CG1909
LOC105832306	-1.3196	6.2102e-10	gene_12361	-2.01333	6.37443e-18	monocarboxylate transporter 12	Sln
LOC118644185	-1.40388	2.46857e-08	gene_15014	-1.87522	8.99835e-11	uncharacterized LOC118644185%2C transcript variant X2	CG3257
LOC105830998	-1.72553	1.79276e-15	gene_15170	-1.51709	1.49478e-06	uncharacterized LOC105830998%2C transcript variant X2	CG31191
LOC105835511	-2.11573	1.13351e-08	gene_12265	-1.22119	8.2124e-07	glutamate-gated chloride channel%2C transcript variant X7	pHCl-1
LOC105837227	-1.10276	9.67963e-08	gene_9781	-2.33796	2.8173e-07	homeotic protein distal-less%2C transcript variant X5	Dll
LOC105831069	-1.43258	1.58786e-11	gene_15463	-1.79275	9.87308e-12	cubilin%2C transcript variant X1	CG42613
LOC105829752	1.35058	3.88438e-06	gene_631	1.88177	1.38537e-06	pigment-dispersing hormone peptides	Pdf
LOC105838293	-1.24048	1.8817e-10	gene_8198	-2.03031	1.92981e-13	RNA-binding protein Musashi homolog Rbp6%2C transcript variant X3	Rbp6
LOC105832933	1.35124	0.0461145	gene_10750	1.82628	0.0181799	uncharacterized LOC105832933	NA
LOC105838102	-2.36292	1.56727e-13	gene_1670	-1.03552	0.00106873	LIM domain only protein 3%2C transcript variant X1	Bx
LOC105834868	-1.94056	1.00968e-11	gene_3958	-1.25338	0.000690569	neuroglobin	NA
LOC105838154	1.82378	2.49545e-06	gene_740	1.33268	0.00136341	collagen alpha-1(III) chain	NA
LOC105838456	1.2033	4.1186e-09	gene_4427	2.00118	1.62471e-11	cellular tumor antigen p53	p53
LOC105836344	-1.99343	2.85087e-14	gene_12562	-1.20325	3.32495e-07	apical junction component 1 homolog%2C transcript variant X2	CG42748
LOC105837690	-1.51896	9.41779e-17	gene_9034	-1.57886	3.96426e-10	high affinity choline transporter 1	NA
LOC105830044	1.53236	8.17947e-05	gene_11007	1.56006	0.000238288	uncharacterized LOC105830044	NA
LOC105828707	1.2308	4.42431e-07	gene_6823	1.94144	8.39739e-09	protein shifted%2C transcript variant X8	shf
LOC105833892	-1.37813	1.94544e-07	gene_10117	-1.71662	3.55768e-13	nephrin%2C transcript variant X3	NA
LOC105839854	-1.36086	1.0122e-06	gene_12344	-1.71823	1.7015e-10	uncharacterized LOC105839854	ssp6
LOC105834843	1.10116	6.79805e-09	gene_13734	2.11634	1.38643e-15	sphingolipid delta(4)-desaturase DES1	ifc
LOC105831140	-1.3774	1.66315e-13	gene_9401	-1.69175	5.92299e-10	RING finger protein 207%2C transcript variant X2	NA
LOC105835263	-1.24113	7.88314e-06	gene_1691	-1.87613	6.93104e-11	uncharacterized LOC105835263%2C transcript variant X5	CG42340
LOC105837151	1.19542	6.22813e-06	gene_593	1.92402	4.53052e-13	troponin T%2C skeletal muscle%2C transcript variant X7	up
LOC105836973	1.16619	1.38055e-12	gene_4348	1.96979	3.14513e-11	10 kDa heat shock protein%2C mitochondrial	CG11267
LOC105837040	1.25404	1.84043e-08	gene_641	1.82575	1.1456e-11	aurora kinase B%2C transcript variant X1	aurB
LOC105831681	-1.23019	1.1348e-09	gene_13013	-1.85795	1.78915e-10	uncharacterized LOC105831681%2C transcript variant X4	CG32809
LOC105837930	-1.77521	5.20294e-11	gene_9228	-1.28714	1.24397e-08	protein FAM135A%2C transcript variant X3	CG32333
LOC105830540	1.14865	6.25145e-07	gene_8443	1.94932	6.62741e-08	cartilage oligomeric matrix protein	Tsp
LOC105838365	-1.0453	1.08314e-11	gene_3834	-2.13647	3.04845e-12	polycomb group protein Psc	NA
LOC105834117	-1.47461	4.62955e-12	gene_2030	-1.50693	9.21569e-06	synapsin%2C transcript variant X2	Syn
LOC105831903	1.72835	3.85242e-07	gene_1986	1.28329	5.82468e-13	uncharacterized LOC105831903	NA
LOC105839980	1.05727	0.00223388	gene_12956	2.09567	2.53389e-06	fructose-1%2C6-bisphosphatase 1	fbp
LOC105839373	-1.12567	8.14098e-12	gene_7273	-1.91586	1.92244e-10	uncharacterized LOC105839373%2C transcript variant X1	gogo
LOC105839675	-1.01902	9.32361e-11	gene_13519	-2.1137	2.67096e-10	uncharacterized LOC105839675%2C transcript variant X1	Schip1
LOC105839497	-1.29342	2.72424e-05	gene_165	-1.6629	9.78496e-09	acetylcholinesterase%2C transcript variant X2	NA
LOC105840580	1.11312	3.65399e-09	gene_15252	1.93087	1.98069e-11	leucine-rich repeat and coiled-coil domain-containing protein 1%2C transcript variant X1	CG5376
LOC105834909	-2.13044	5.93636e-14	gene_12830	-1.00831	1.41195e-07	calcium-dependent secretion activator%2C transcript variant X2	Cadps
LOC105835403	1.34848	0.000669285	gene_6730	1.58178	1.79308e-08	lysozyme 2	CG6426, CG6435, CG6421
LOC105833193	-1.89847	7.52526e-12	gene_7931	-1.12352	0.000183404	histone-lysine N-methyltransferase%2C H3 lysine-79 specific	CG13251
LOC105828354	-1.40707	1.86001e-13	gene_13226	-1.51187	9.78779e-17	ALK tyrosine kinase receptor%2C transcript variant X1	Alk
LOC105839503	1.41305	1.10187e-10	gene_7134	1.50513	6.29429e-06	SET domain-containing protein SmydA-8	SmydA-5
LOC105834335	-1.42343	1.38078e-14	gene_9506	-1.49196	1.22256e-09	uncharacterized LOC105834335%2C transcript variant X1	CG12502
LOC105835642	-1.71321	2.43701e-17	gene_14282	-1.23839	4.2549e-09	putative thiamine transporter SLC35F3%2C transcript variant X6	CG42322
LOC105833440	-1.7241	4.43748e-11	gene_10291	-1.225	4.8344e-06	locomotion-related protein Hikaru genki	hig
LOC105832023	-1.5849	2.31057e-12	gene_9118	-1.32376	4.69609e-06	Kv channel-interacting protein 1	CG5890
LOC118645056	1.04753	3.17136e-05	gene_14789	1.99896	9.05924e-14	nucleoside diphosphate kinase-like	awd
LOC105838773	-1.95649	1.80654e-13	gene_15045	-1.05537	2.43493e-10	cationic amino acid transporter 2%2C transcript variant X2	CG12531
LOC105828529	1.23286	9.39751e-07	gene_9835	1.67449	0.0324475	retinoid-inducible serine carboxypeptidase%2C transcript variant X1	CG31823, CG32483, hiro
LOC105835848	-1.0826	5.83915e-14	gene_1816	-1.9032	7.94978e-11	glyoxylate reductase/hydroxypyruvate reductase	CG31673, CG31674, CG9331
LOC105830001	-1.62134	6.40764e-09	gene_1916	-1.26788	5.32739e-08	runt-related transcription factor 1%2C transcript variant X5	RunxA
LOC105834839	1.25509	4.56963e-07	gene_13736	1.63497	1.20988e-08	isocitrate dehydrogenase [NAD] subunit gamma%2C mitochondrial	CG5028
LOC105828199	1.0552	0.000325948	gene_3262	1.94343	0.000174956	alpha-tocopherol transfer protein-like%2C transcript variant X1	CG10237
LOC105832968	-1.3212	1.50227e-10	gene_1117	-1.54382	7.16898e-12	dipeptidyl aminopeptidase-like protein 6%2C transcript variant X2	CG11319
LOC105838369	-1.58376	5.245e-18	gene_3872	-1.28154	4.85835e-07	alpha-tubulin N-acetyltransferase	Tat, CG17003
LOC105837888	-1.10004	8.37611e-12	gene_15371	-1.8219	6.13439e-14	stress-activated protein kinase JNK%2C transcript variant X1	bsk
LOC105839074	-1.11122	2.11907e-07	gene_5690	-1.79667	3.25138e-16	sodium channel protein para%2C transcript variant X7	para
LOC105834715	-1.67451	4.00342e-15	gene_9394	-1.19223	7.99528e-06	uncharacterized LOC105834715%2C transcript variant X2	Fie
LOC105834545	1.24461	5.59207e-06	gene_9081	1.60323	0.00012483	cytochrome P450 4g15	Cyp4g1
LOC105839344	-1.27225	2.04446e-06	gene_4035	-1.5624	3.99513e-07	serine-enriched protein%2C transcript variant X2	gprs
LOC105838132	1.29483	2.55881e-08	gene_4469	1.53012	3.59679e-05	dihydrofolate reductase%2C transcript variant X2	Dhfr
LOC105836947	-1.1047	6.49991e-06	gene_11143	-1.78977	2.43493e-10	uncharacterized LOC105836947%2C transcript variant X1	CG31051
LOC105839869	-1.2536	4.10339e-12	gene_623	-1.57603	4.56175e-09	uncharacterized LOC105839869%2C transcript variant X11	CG15894
LOC105839921	1.00177	3.27786e-07	gene_10353	1.95612	3.03574e-10	complement component 1 Q subcomponent-binding protein%2C mitochondrial	P32
LOC105829570	-1.20039	0.00295547	gene_4350	-1.63017	1.95104e-12	uncharacterized LOC105829570	CG2225
LOC105833909	1.33475	8.831e-07	gene_6439	1.45413	1.59151e-09	proton-coupled amino acid transporter-like protein CG1139	CG7888
LOC105836659	1.27606	8.29078e-09	gene_658	1.51948	9.16324e-07	G2/mitotic-specific cyclin-B	CycB
LOC105838413	1.14196	3.01251e-10	gene_7690	1.69655	5.62012e-10	uncharacterized LOC105838413%2C transcript variant X2	CG5854
LOC105836902	-1.25109	8.93306e-09	gene_6060	-1.54588	1.14849e-15	kinesin-like protein KIF3B%2C transcript variant X1	Klp68D
LOC105837627	1.56955	0.00159602	gene_7183	1.22163	0.00109379	uncharacterized LOC105837627%2C transcript variant X2	NA
LOC105837206	-1.12424	2.87814e-14	gene_11879	-1.68935	4.35213e-05	uncharacterized LOC105837206%2C transcript variant X2	Corin
LOC105836054	-1.17795	1.02346e-10	gene_11960	-1.6123	6.40549e-09	excitatory amino acid transporter%2C transcript variant X1	Eaat2
LOC105837252	1.30361	0.00377432	gene_912	1.44817	0.00364128	probable glutathione peroxidase 2%2C transcript variant X1	NA
LOC105830341	1.59281	1.67649e-07	gene_137	1.18129	4.43951e-05	serine/threonine-protein kinase polo%2C transcript variant X2	polo
LOC105834120	1.03257	5.3826e-05	gene_1890	1.81626	7.0701e-10	uncharacterized LOC105834120%2C transcript variant X2	CG12814
LOC105831090	1.40537	6.8018e-09	gene_10164	1.3339	5.106e-11	dipeptidyl peptidase 3%2C transcript variant X1	DppIII
LOC105836020	-1.25467	8.57406e-13	gene_6340	-1.48004	1.42125e-11	uncharacterized LOC105836020	RhoGEF3
LOC105828676	1.32428	6.74761e-08	gene_11731	1.39771	1.01764e-09	cyclin-A2%2C transcript variant X2	CycA
LOC105833024	1.44311	0.00194194	gene_1627	1.26054	0.00122145	transferrin	Tsf1
LOC105835904	-1.76467	4.76363e-14	gene_2406	-1.02889	3.49974e-07	microtubule-associated protein tau%2C transcript variant X2	tau
LOC105833820	-1.36499	4.36174e-12	gene_12041	-1.33013	1.22724e-07	carbonic anhydrase-related protein 10%2C transcript variant X2	CARPA
LOC105831575	-1.0984	2.06385e-09	gene_9141	-1.65118	3.76042e-11	zinc finger protein 37 homolog%2C transcript variant X5	NA
LOC105829385	1.07688	0.000539598	gene_12756	1.66619	1.2608e-05	uncharacterized LOC105829385	NA
LOC105829405	-1.63932	5.21587e-12	gene_4438	-1.0912	4.71149e-07	uncharacterized LOC105829405%2C transcript variant X2	NA
LOC105828528	1.05934	4.60972e-06	gene_9835	1.67449	0.0324475	retinoid-inducible serine carboxypeptidase	CG31823, CG32483, hiro
LOC105834417	-1.26214	3.19831e-09	gene_7033	-1.39807	3.76989e-08	beta-1%2C4-glucuronyltransferase 1%2C transcript variant X2	NA
LOC105835820	-1.70575	1.41951e-17	gene_7987	-1.029	5.14945e-07	uncharacterized LOC105835820%2C transcript variant X5	NA
LOC105839511	-1.28987	2.61566e-08	gene_954	-1.35836	4.34946e-09	inactive rhomboid protein 1%2C transcript variant X3	rho-5
LOC105833842	-1.40022	0.0012274	gene_8800	-1.24965	0.000566601	uncharacterized LOC105833842%2C transcript variant X3	NA
LOC105840350	1.72408	2.42382e-07	gene_3534	1.0147	6.93157e-07	aurora kinase C	aurA
LOC105828589	-1.12516	2.32908e-07	gene_13170	-1.55453	5.79902e-08	uncharacterized LOC105828589%2C transcript variant X3	CG5921
LOC105836815	-1.26613	8.77637e-17	gene_6822	-1.358	1.1007e-11	DNA-binding protein P3A2%2C transcript variant X6	ewg
LOC105832148	-1.0757	5.72827e-13	gene_10964	-1.59702	1.70153e-13	phosphatase and actin regulator 4%2C transcript variant X5	CG32264
LOC105831226	-1.21811	5.22757e-08	gene_5622	-1.39022	4.09027e-11	hemicentin-2%2C transcript variant X1	NA
LOC105837291	-1.58682	3.55851e-15	gene_4886	-1.06241	0.000221281	zwei Ig domain protein zig-8%2C transcript variant X2	dpr12
LOC105835389	-1.54586	3.32438e-15	gene_8484	-1.08706	0.000496368	soma ferritin%2C transcript variant X1	Fer3HCH
LOC105837765	-1.55577	9.40716e-08	gene_309	-1.07457	6.3428e-06	hepatocyte nuclear factor 6%2C transcript variant X1	onecut
LOC105828349	-1.38887	4.32349e-11	gene_6786	-1.19658	0.00183446	uncharacterized LOC105828349%2C transcript variant X4	jus
LOC105830176	1.28897	7.3779e-07	gene_12664	1.28328	1.38918e-07	adenosylhomocysteinase	Ahcy
LOC105831539	-1.07602	5.70002e-05	gene_10699	-1.53563	9.47432e-05	dachshund homolog 2%2C transcript variant X8	dac
LOC105833841	1.19701	0.000253615	gene_8801	1.37483	0.0023524	uncharacterized LOC105833841	NA
LOC105837979	-1.62184	7.38292e-08	gene_4847	-1.01146	8.85273e-05	uncharacterized LOC105837979	igl
LOC105838024	1.18661	0.0384061	gene_10491	1.3486	4.61434e-10	putative mediator of RNA polymerase II transcription subunit 12%2C transcript variant X2	NA
LOC105837933	-1.57769	1.00558e-10	gene_8935	-1.00897	9.52707e-07	sodium/calcium exchanger 2%2C transcript variant X1	Calx
LOC118644033	1.42783	9.12222e-06	gene_3755	1.11411	1.47463e-07	pyruvate carboxylase%2C mitochondrial-like	PCB
LOC118644029	-1.33029	1.2967e-14	gene_8958	-1.19184	2.96835e-05	vesicular acetylcholine transporter	VAChT
LOC105834874	-1.24627	1.67297e-13	gene_3145	-1.26419	5.18073e-07	voltage-dependent calcium channel subunit alpha-2/delta-3%2C transcript variant X1	stj
LOC105837847	-1.31989	4.08248e-13	gene_10141	-1.18543	0.00116891	uncharacterized LOC105837847%2C transcript variant X1	NA
LOC105840234	1.03739	7.98745e-09	gene_3699	1.50484	5.55579e-09	protein l(2)37Cc	l_2_37Cc
LOC105840588	-1.25884	6.90215e-12	gene_5684	-1.23068	1.13967e-08	protein disabled%2C transcript variant X1	Dab
LOC105839934	-1.25098	5.77228e-15	gene_3987	-1.2326	1.655e-05	JNK-interacting protein 1%2C transcript variant X3	Aplip1
LOC118644084	1.35464	0.00150075	gene_4174	1.13695	2.48213e-10	xyloside xylosyltransferase 1-like	Xxylt
LOC105830881	-1.19175	0.000141073	gene_606	-1.28035	7.81806e-10	uncharacterized LOC105830881	kmr
LOC105834687	1.08291	0.000453973	gene_9621	1.40808	1.86375e-06	frizzled-4%2C transcript variant X1	fz4
LOC105838638	-1.36266	3.47828e-08	gene_14716	-1.1133	1.29147e-05	uncharacterized LOC105838638	7B2
LOC105831032	-1.39991	1.43365e-10	gene_4989	-1.08295	2.7578e-06	guanylate cyclase soluble subunit beta-1	Gycbeta100B
LOC105837631	1.31095	6.56395e-06	gene_7568	1.14627	5.04985e-05	4-coumarate--CoA ligase 1%2C transcript variant X2	CG6178
LOC105831894	-1.30628	1.69708e-09	gene_8959	-1.14685	1.17345e-05	choline O-acetyltransferase	ChAT
LOC105837949	-1.28223	1.67103e-05	gene_2641	-1.16482	9.27493e-07	MICAL-like protein 1%2C transcript variant X2	MICAL-like
LOC105837985	-1.4786	9.41779e-17	gene_668	-1.00744	4.26912e-08	protein stoned-B	stnB
LOC105837409	1.13005	4.45865e-07	gene_14358	1.31468	2.34988e-09	nucleoporin NDC1%2C transcript variant X2	Ndc1
LOC105831160	1.17719	2.41353e-05	gene_10258	1.23151	1.70411e-08	DNA replication licensing factor Mcm3	Mcm3
LOC118646761	-1.32808	1.71322e-12	gene_5055	-1.09148	0.00429009	uncharacterized LOC118646761	NA
LOC105836053	1.22828	1.78237e-06	gene_11959	1.17912	2.49166e-05	deoxynucleoside kinase	dnk
LOC105833428	1.02567	0.000408289	gene_12826	1.40986	3.73112e-07	ribonuclease H2 subunit A	CG13690
LOC114253713	1.24666	0.00254019	gene_1486	1.15404	0.000656379	uncharacterized LOC114253713	CG3301, CG9360, CG10962, antdh, CG40485, CG40486, CG9150, CG8757
LOC105838211	-1.02381	2.03102e-09	gene_8608	-1.39975	1.2769e-10	oxysterol-binding protein-related protein 2	CG3860
LOC105837883	1.04828	8.78088e-08	gene_9059	1.36189	1.78965e-06	MAM and LDL-receptor class A domain-containing protein 2%2C transcript variant X1	Sr-CI, Sr-CII, Sr-CIII, Sr-CIV
LOC105839535	-1.2674	3.31134e-13	gene_7395	-1.1259	8.3121e-08	neuroligin-1	Nlg2
LOC105834755	-1.06999	4.70724e-10	gene_8756	-1.30752	0.00096284	GSK-3-binding protein	NA
LOC105839953	-1.24839	1.34535e-11	gene_11584	-1.11796	2.0785e-11	insulin receptor%2C transcript variant X1	CG10702
LOC118646185	-1.01027	2.00422e-06	gene_4606	-1.37106	4.48002e-08	uncharacterized LOC118646185	NA
LOC105838746	-1.00062	9.84827e-08	gene_4906	-1.38307	6.44305e-08	electroneutral sodium bicarbonate exchanger 1%2C transcript variant X12	Ndae1
LOC105837011	1.0387	3.57473e-05	gene_11910	1.32574	0.00124992	persulfide dioxygenase ETHE1%2C mitochondrial%2C transcript variant X1	CG30022
LOC105837326	-1.25513	2.45277e-06	gene_11480	-1.08781	0.00107677	uncharacterized LOC105837326%2C transcript variant X1	CG3955
LOC105837176	-1.24776	0.00272171	gene_11583	-1.09384	2.94032e-07	PI-PLC X domain-containing protein 1%2C transcript variant X3	PLCXD
LOC105829070	1.23811	0.000784624	gene_7178	1.10127	0.00734102	uncharacterized LOC105829070	CG31086
LOC105832767	-1.16788	0.000535373	gene_1096	-1.14639	0.000303985	proton channel OtopLc	NA
LOC105839918	-1.05528	1.51727e-05	gene_10352	-1.25861	3.93666e-09	synaptosomal-associated protein 25%2C transcript variant X2	Snap24, Snap25
LOC105829205	1.1789	4.39465e-09	gene_12170	1.12272	0.0123745	kynurenine 3-monooxygenase%2C transcript variant X1	cn
LOC105837286	1.27652	0.0252515	gene_9906	1.02033	0.0292145	C-type lectin 37Db%2C transcript variant X7	tfc
LOC105831058	1.09704	2.39454e-07	gene_4736	1.15626	0.000705507	delta-1-pyrroline-5-carboxylate synthase%2C transcript variant X1	CG7470
LOC105839929	-1.12537	3.58482e-11	gene_8635	-1.12242	9.52449e-06	synaptotagmin-14%2C transcript variant X3	Syt14
LOC105838330	1.0075	0.00892568	gene_13044	1.25093	0.00524614	monocarboxylate transporter 4%2C transcript variant X2	hrm
LOC105835451	-1.09449	1.65504e-14	gene_9424	-1.14553	0.000275593	endothelin-converting enzyme homolog%2C transcript variant X1	Nep3
LOC105834226	1.21118	4.05686e-06	gene_12205	1.02537	6.5454e-07	DNA replication licensing factor MCM4	dpa
LOC105836797	1.02077	0.000157612	gene_12931	1.21264	4.43207e-06	acyl-CoA synthetase short-chain family member 3%2C mitochondrial%2C transcript variant X2	CG6432
LOC105831412	-1.18377	0.00111113	gene_13880	-1.01097	1.10568e-08	sodium-independent sulfate anion transporter%2C transcript variant X7	CG6928
LOC105835685	-1.17158	2.16806e-10	gene_275	-1.01936	7.06679e-05	small conductance calcium-activated potassium channel protein%2C transcript variant X5	SK
LOC105827880	1.14549	3.99413e-10	gene_680	1.0277	5.35731e-07	ribonucleoside-diphosphate reductase large subunit%2C transcript variant X1	RnrL
LOC105840140	1.00049	0.00174316	gene_10357	1.15674	0.00150772	uncharacterized LOC105840140	t
LOC105838519	-1.06603	1.37919e-13	gene_5178	-1.06201	1.21978e-07	uncharacterized LOC105838519	NA
LOC105829762	1.02969	0.00246668	gene_423	1.04549	0.000396939	probable chitinase 10	Cht10

## Sheet: Late pupa
GeneID (M.pharaonis, NCBI)	log2 Foldchange (M.pharaonis)	FDR adjusted pvalue (M.pharaonis)	GeneID (A.echinatior, in house)	log2 Foldchange (A.echinatior)	FDR adjusted pvalue (A.echinatior)	Gene name (NCBI)	Orthologs (D. melanogaster)
LOC105833997	10.1327	2.35079e-40	gene_2834	10.0194	4.82747e-29	tropomyosin-2%2C transcript variant X1	Tm2
LOC105833863	7.6669	4.80197e-37	gene_8805	10.6366	2.81592e-28	skin secretory protein xP2	NA
LOC114255695	8.3158	3.55846e-30	gene_2925	8.56439	1.00727e-21	proline-rich extensin-like protein EPR1	NA
LOC105837730	7.95893	2.46018e-17	gene_11238	5.14951	3.8746e-05	uncharacterized LOC105837730	NA
LOC105833150	6.49861	8.02295e-27	gene_8933	4.81528	1.00516e-11	collagen alpha-5(IV) chain	frm
LOC105840713	6.44224	4.46949e-30	gene_10550	3.20875	2.2417e-05	uncharacterized LOC105840713	Kaz1-ORFB
LOC105834903	4.34856	3.09473e-20	gene_10983	4.65753	1.85297e-11	uncharacterized LOC105834903	NA
LOC105839887	3.56548	1.34634e-16	gene_3866	5.00071	1.12368e-05	uncharacterized LOC105839887%2C transcript variant X1	NA
LOC105837661	4.338	5.76182e-17	gene_11249	3.46688	0.000328279	pupal cuticle protein 20%2C transcript variant X2	NA
LOC105838647	-3.98895	3.01943e-20	gene_9783	-3.76208	6.06044e-09	SIFamide-related peptide%2C transcript variant X1	SIFa
LOC105838987	5.27754	1.50229e-23	gene_256	2.80179	8.47222e-11	mucin-19	NA
LOC105829082	-3.39355	1.73735e-29	gene_6797	-4.21621	7.73197e-10	1-phosphatidylinositol 4%2C5-bisphosphate phosphodiesterase epsilon-1%2C transcript variant X1	NA
LOC105828852	2.96226	3.34832e-20	gene_3869	4.42208	3.74797e-19	SET and MYND domain-containing protein 4%2C transcript variant X2	NA
LOC105836204	6.71489	2.23992e-31	gene_2032	1.9482	3.3089e-05	troponin C%2C isoallergen Bla g 6.0101	TpnC41C
LOC105829939	-2.5403	7.38808e-22	gene_6466	-4.93374	1.34287e-08	pollen-specific leucine-rich repeat extensin-like protein 1	NA
LOC105835740	3.31066	1.08909e-17	gene_14141	3.70757	6.49801e-08	actin%2C muscle	Act88F, Act57B, Act87E
LOC105832669	-2.77889	2.7909e-22	gene_4031	-4.25447	7.34395e-07	uncharacterized LOC105832669	NA
LOC105830034	-2.67333	9.62895e-24	gene_12960	-4.33934	9.95788e-10	muscarinic acetylcholine receptor DM1%2C transcript variant X2	mAChR-A
LOC105833824	3.40916	2.04768e-18	gene_10588	3.13701	2.07457e-05	uncharacterized LOC105833824	CG15617, CG42319, Zasp67
LOC105836054	-2.31616	3.25732e-15	gene_11960	-4.0879	5.25941e-09	excitatory amino acid transporter%2C transcript variant X1	Eaat2
LOC105839073	-2.39808	1.47024e-12	gene_5691	-3.92536	7.13731e-08	uncharacterized protein DDB_G0271670	NA
LOC105833358	-2.36303	1.14286e-21	gene_541	-3.8479	1.48328e-09	43 kDa receptor-associated protein of the synapse homolog%2C transcript variant X2	CG1909
LOC105831878	-2.18941	7.40406e-18	gene_8610	-4.12698	6.22122e-09	adenylyl cyclase 78C%2C transcript variant X1	Ac78C
LOC105832775	-2.66049	4.0582e-20	gene_13835	-3.38397	1.04444e-05	complexin%2C transcript variant X2	cpx
LOC105835220	-2.17719	2.49371e-18	gene_7144	-4.13051	1.93435e-10	neuronal acetylcholine receptor subunit alpha-7%2C transcript variant X2	nAChRalpha6
LOC105833526	2.24545	8.94885e-23	gene_8182	3.98134	1.03515e-13	protein vestigial%2C transcript variant X2	vg
LOC105837979	-2.95042	1.04734e-24	gene_4847	-3.01129	1.53393e-06	uncharacterized LOC105837979	igl
LOC105831991	2.04125	1.74042e-20	gene_7146	4.29313	4.92222e-14	armadillo repeat-containing protein 6 homolog	CG5721
LOC105835213	-2.05591	4.02326e-18	gene_11076	-4.07681	2.02538e-10	protein unc-79 homolog%2C transcript variant X4	unc79
LOC114254878	-2.86118	8.11044e-17	gene_10317	-2.91223	6.67332e-07	uncharacterized LOC114254878	NA
LOC105836926	-2.25669	5.84207e-20	gene_9988	-3.69057	1.57993e-09	basement membrane-specific heparan sulfate proteoglycan core protein%2C transcript variant X3	dpr7
LOC105837332	-2.7191	2.49692e-23	gene_2827	-3.04995	1.5758e-08	ras-specific guanine nucleotide-releasing factor 2%2C transcript variant X3	NA
LOC118645095	3.40371	4.86756e-08	gene_9973	2.43223	0.0316599	trypsin-1-like	CG7142, Phae2, Phae1, CG11911, CG11912
LOC105834813	-2.63063	6.70121e-22	gene_11625	-3.12422	7.13731e-08	regulating synaptic membrane exocytosis protein 2%2C transcript variant X1	Rim
LOC118646539	-1.84764	2.95941e-07	gene_5045	-4.4092	7.88916e-10	uncharacterized LOC118646539	NA
LOC105835806	-1.89006	9.87495e-22	gene_7990	-4.15795	5.18654e-10	disintegrin and metalloproteinase domain-containing protein 11%2C transcript variant X15	mmd
LOC105832719	-2.54611	8.31248e-21	gene_9934	-3.08435	3.12641e-07	anoctamin-8%2C transcript variant X3	CG15270
LOC105839323	-2.24019	9.4063e-21	gene_3981	-3.49386	9.07288e-09	gamma-aminobutyric acid receptor subunit beta%2C transcript variant X4	Rdl
LOC105837944	-1.96159	7.26555e-16	gene_1391	-3.97679	1.75128e-09	uncharacterized LOC105837944%2C transcript variant X6	NA
LOC105829940	-2.54586	1.94815e-13	gene_6467	-3.03969	3.19354e-06	cyclin-dependent kinase 5 activator 1	Cdk5alpha
LOC105837530	-2.56364	5.97369e-22	gene_7606	-2.99262	4.70521e-07	protein still life%2C isoform SIF type 1%2C transcript variant X12	sif
LOC105837479	-1.90233	2.55037e-18	gene_11213	-3.94888	5.12928e-10	uncharacterized LOC105837479%2C transcript variant X6	NA
LOC105832392	-1.80954	2.41282e-17	gene_4440	-4.14647	4.91403e-14	broad-complex core protein%2C transcript variant X21	br
LOC118648275	-2.2686	7.55018e-29	gene_3168	-3.28493	8.47687e-09	probable G-protein coupled receptor CG31760%2C transcript variant X3	CG31760
LOC105840398	2.63643	1.23432e-09	gene_8889	2.82069	2.6303e-08	uncharacterized LOC105840398	spz
LOC105838856	-2.46912	1.91767e-12	gene_10941	-3.01142	0.000276355	pheromone-binding protein-related protein 6	NA
LOC105832126	-2.00703	1.07378e-23	gene_9115	-3.6716	4.0167e-09	proline-rich protein 36%2C transcript variant X3	CG42726, scrt
LOC105837335	-2.179	2.02616e-15	gene_10472	-3.37713	1.14846e-07	uncharacterized LOC105837335	CG40498
LOC105829177	-2.67219	5.63647e-20	gene_9739	-2.74492	2.22264e-08	uncharacterized LOC105829177	Hasp
LOC105835641	-1.76255	8.13978e-16	gene_1832	-4.13403	1.69265e-09	acetylcholine receptor subunit alpha-like%2C transcript variant X2	nAChRalpha4
LOC118646761	-2.19083	1.14186e-22	gene_5055	-3.32076	2.99552e-09	uncharacterized LOC118646761	NA
LOC105839499	2.23948	1.75853e-06	gene_334	3.22559	7.52998e-05	uncharacterized LOC105839499	NA
LOC118648799	-2.17912	1.33228e-15	gene_3168	-3.28493	8.47687e-09	probable G-protein coupled receptor CG31760%2C transcript variant X3	CG31760
LOC105837836	-2.01248	8.27569e-22	gene_1003	-3.52682	1.82806e-10	potassium voltage-gated channel protein Shab%2C transcript variant X3	Shab
LOC105834578	-2.15944	5.29401e-21	gene_3168	-3.28493	8.47687e-09	probable G-protein coupled receptor CG31760%2C transcript variant X11	CG31760
LOC105830311	3.34048	6.40985e-25	gene_9075	2.1124	6.99159e-05	waprin-Phi1%2C transcript variant X1	NA
LOC105837076	-2.11994	2.68007e-22	gene_9530	-3.32243	3.41684e-08	guanine nucleotide-binding protein subunit gamma-e	Ggamma30A
LOC105833958	-2.1344	3.51061e-29	gene_6594	-3.28341	3.41983e-13	paired box protein Pax-6%2C transcript variant X2	NA
LOC105840124	-2.37011	1.52366e-22	gene_944	-2.947	9.39517e-09	protein nervous wreck%2C transcript variant X2	nwk
LOC105837456	-2.39812	2.7909e-22	gene_6753	-2.87546	4.85912e-05	sodium/potassium-transporting ATPase subunit beta-2	nrv3
LOC105839137	-2.10891	7.11714e-24	gene_494	-3.24991	1.44732e-07	voltage-gated potassium channel subunit beta-2%2C transcript variant X2	Hk
LOC105836990	-2.09046	1.12739e-16	gene_7459	-3.26159	2.10484e-08	protein quiver%2C transcript variant X2	qvr
LOC105831002	-2.37618	2.08307e-19	gene_15176	-2.84476	1.69809e-07	Kv channel-interacting protein 2%2C transcript variant X4	NA
LOC105829095	-2.38291	1.79567e-21	gene_13722	-2.8354	2.66892e-07	cubilin%2C transcript variant X1	CG34370
LOC118644733	-2.33593	7.47096e-16	gene_670	-2.88323	2.30852e-07	uncharacterized LOC118644733	NA
LOC105832020	-2.43912	1.08528e-24	gene_14176	-2.74475	5.18801e-08	diacylglycerol kinase theta%2C transcript variant X10	CG31140
LOC105837925	-1.88183	1.80761e-21	gene_11108	-3.5125	1.90716e-09	uncharacterized LOC105837925	Mid1
LOC105837526	-2.22476	1.0457e-16	gene_204	-2.96623	5.1181e-06	uncharacterized LOC105837526	CG32206
LOC105829993	-2.14245	3.20392e-16	gene_2698	-3.05795	2.47249e-07	peroxidasin homolog	dpr6
LOC105839343	-2.38307	8.74508e-13	gene_4034	-2.73093	5.59979e-08	putative mediator of RNA polymerase II transcription subunit 26	NA
LOC105832193	-1.75901	2.25098e-20	gene_9890	-3.68804	7.7757e-10	clock-controlled protein 8%2C transcript variant X2	CG42784
LOC105833988	-2.1002	1.6128e-10	gene_3299	-3.08193	0.00010646	immunoglobulin domain-containing protein oig-4	nkt
LOC105832970	-2.05774	7.53439e-19	gene_8248	-3.14499	9.95788e-10	centrosomal protein of 164 kDa%2C transcript variant X1	CG9170
LOC105836330	-2.33589	2.87827e-20	gene_14717	-2.74602	7.08536e-07	synaptotagmin 1%2C transcript variant X1	Syt1
LOC105830662	-2.02133	1.09987e-22	gene_14868	-3.16413	1.87941e-10	gamma-aminobutyric acid type B receptor subunit 2	GABA-B-R2
LOC105840129	-2.07588	4.42906e-14	gene_13071	-3.07091	1.99892e-08	uncharacterized LOC105840129%2C transcript variant X1	St3
LOC105830610	-2.22307	3.95206e-28	gene_5887	-2.85212	4.74133e-07	leucine-rich repeat%2C immunoglobulin-like domain and transmembrane domain-containing protein 2	kek1
LOC105831357	-2.2834	8.2431e-22	gene_5112	-2.77564	0.000853803	uncharacterized LOC105831357%2C transcript variant X2	CG12994, CG17193
LOC105838187	-2.21106	3.62383e-27	gene_4167	-2.86562	9.00115e-09	voltage-dependent calcium channel subunit alpha-2/delta-4%2C transcript variant X1	CG4587
LOC105836320	-2.4299	1.48725e-21	gene_1869	-2.60309	2.0805e-07	neuronal acetylcholine receptor subunit alpha-7%2C transcript variant X1	nAChRalpha7, nAChRalpha5
LOC105832243	-2.27102	8.74363e-13	gene_1462	-2.77564	2.84098e-06	uncharacterized LOC105832243%2C transcript variant X5	Rgk1
LOC105834122	-2.12389	9.65301e-18	gene_5046	-2.95541	1.59332e-11	homeobox protein prospero%2C transcript variant X2	pros
LOC105837217	-1.89895	1.46993e-16	gene_10661	-3.2904	2.11112e-06	uncharacterized LOC105837217%2C transcript variant X3	NA
LOC105837552	3.56785	1.06903e-30	gene_10787	1.73593	2.47628e-05	ribonuclease H%2C transcript variant X1	NA
LOC105829980	-1.56918	3.43033e-10	gene_7195	-3.94611	7.16269e-12	carbonic anhydrase-related protein 10%2C transcript variant X1	CARPB
LOC105829883	2.69491	2.0421e-18	gene_8980	2.29612	6.53864e-07	uncharacterized LOC105829883	CG31997
LOC105832618	1.99934	5.45734e-06	gene_3893	3.04386	0.000726329	zinc carboxypeptidase	CG43235, CG14820, CG18585, CG7025, CG17633, CG4017
LOC105840044	-2.44745	5.47498e-21	gene_11856	-2.47747	1.27113e-06	regulating synaptic membrane exocytosis protein 2%2C transcript variant X2	Fife
LOC105830192	-1.66629	3.25519e-13	gene_15062	-3.61845	0.00147485	skin secretory protein xP2	NA
LOC105830790	-1.93321	3.33887e-24	gene_10957	-3.09836	6.41073e-11	glucose transporter type 1%2C transcript variant X6	Glut1
LOC105836368	-1.78922	2.59321e-19	gene_5729	-3.32216	2.22605e-09	uncharacterized LOC105836368%2C transcript variant X3	CG9919
LOC105831539	-2.39435	1.26131e-23	gene_10699	-2.47543	4.20951e-11	dachshund homolog 2%2C transcript variant X8	dac
LOC105835809	-2.48022	1.42208e-19	gene_7991	-2.38795	8.56002e-06	uncharacterized LOC105835809%2C transcript variant X1	Drep2
LOC105833774	-1.82475	4.74169e-20	gene_9377	-3.22211	1.00841e-09	voltage-dependent T-type calcium channel subunit alpha-1G	Ca-alpha1T
LOC105829354	-2.26951	1.98122e-18	gene_5091	-2.58037	4.93521e-05	uncharacterized LOC105829354%2C transcript variant X1	CG14321
LOC105833651	-2.16326	3.47536e-20	gene_8906	-2.70636	1.76588e-07	neuroligin-4%2C Y-linked%2C transcript variant X2	Nlg4
LOC105838731	-1.96045	1.92709e-27	gene_144	-2.97428	2.90269e-09	class E basic helix-loop-helix protein 22%2C transcript variant X2	Oli
LOC105827925	2.3977	1.05811e-14	gene_12422	2.42745	1.57879e-05	hemocyte protein-glutamine gamma-glutamyltransferase	NA
LOC105831134	-2.1283	3.94958e-22	gene_12698	-2.71054	1.21445e-06	glutamate-gated chloride channel%2C transcript variant X3	GluClalpha
LOC105832480	-1.962	1.76044e-23	gene_7122	-2.92524	6.43811e-08	uncharacterized LOC105832480%2C transcript variant X2	Syt12
LOC105836300	2.26584	0.0477305	gene_9662	2.53246	0.0419321	translation initiation factor IF-2%2C transcript variant X2	CG12164
LOC105827806	-2.28462	4.79385e-25	gene_10216	-2.50829	4.43718e-06	RE1-silencing transcription factor B%2C transcript variant X3	NA
LOC105834854	-1.97898	1.27904e-12	gene_8477	-2.89312	0.000210084	proton channel OtopLc%2C transcript variant X8	OtopLa
LOC105834274	-1.98698	1.16813e-21	gene_691	-2.85456	1.12767e-06	proteoglycan 4%2C transcript variant X15	CG17816
LOC105839793	-2.1859	5.10748e-17	gene_4866	-2.58349	2.42819e-06	ELAV-like protein 3%2C transcript variant X15	elav, fne, Rbp9
LOC105836072	1.76658	3.24246e-15	gene_10740	3.19666	5.49801e-11	golgin subfamily A member 6-like protein 22%2C transcript variant X2	NA
LOC105834520	-2.12445	5.73923e-25	gene_1579	-2.65766	3.69057e-09	nucleolysin TIAR%2C transcript variant X7	trv, CG34354
LOC105838564	1.35967	1.59262e-06	gene_9872	4.14424	1.00815e-08	fibrillin-2	NimC2, eater
LOC105835511	-2.03327	7.00751e-21	gene_12265	-2.77026	1.05714e-08	glutamate-gated chloride channel%2C transcript variant X7	pHCl-1
LOC105838792	-2.13898	6.33893e-16	gene_1311	-2.63254	2.47867e-09	dipeptidase 1%2C transcript variant X2	CG6154
LOC105834162	-2.04153	8.99127e-17	gene_3810	-2.75391	5.4664e-06	SPEG neighbor protein	dpr21
LOC105839127	-1.765	1.32638e-14	gene_1794	-3.17702	2.0636e-09	trithorax group protein osa	enc
LOC105829405	-2.44179	3.40653e-18	gene_4438	-2.29446	1.03152e-05	uncharacterized LOC105829405%2C transcript variant X2	NA
LOC105839074	-1.8676	3.02926e-19	gene_5690	-2.98718	8.85837e-10	sodium channel protein para%2C transcript variant X7	para
LOC105831069	-2.06468	6.34237e-20	gene_15463	-2.69623	3.59138e-09	cubilin%2C transcript variant X1	CG42613
LOC105832968	-2.15066	2.56034e-19	gene_1117	-2.58334	7.38746e-08	dipeptidyl aminopeptidase-like protein 6%2C transcript variant X2	CG11319
LOC105831718	-1.51092	8.16953e-12	gene_11303	-3.6768	5.02458e-08	acetylcholine receptor subunit alpha-like 1%2C transcript variant X3	nAChRalpha1
LOC105836520	-1.89959	1.82672e-22	gene_12679	-2.87623	6.78703e-07	myosuppressin	Ms
LOC105837333	-2.29678	4.87948e-23	gene_2605	-2.37091	8.82083e-07	T-lymphocyte activation antigen CD86%2C transcript variant X2	dpr4
LOC105836921	-1.54035	3.02387e-12	gene_13409	-3.53356	3.06204e-10	Down syndrome cell adhesion molecule-like protein Dscam2%2C transcript variant X5	NA
LOC105836219	-1.86622	6.21318e-18	gene_12121	-2.9154	6.76989e-10	protein turtle%2C transcript variant X7	tutl
LOC105834595	-2.18157	1.19882e-16	gene_15029	-2.48521	6.30705e-07	major facilitator superfamily domain-containing protein 6%2C transcript variant X3	jef
LOC105831332	-1.31591	4.37466e-12	gene_2409	-4.1156	1.84868e-09	collagen alpha chain CG42342%2C transcript variant X5	CG42342
LOC105834715	-2.43873	1.54503e-22	gene_9394	-2.20042	9.91313e-06	uncharacterized LOC105834715%2C transcript variant X2	Fie
LOC105838013	1.53041	0.000749047	gene_10490	3.49579	3.02014e-08	uncharacterized LOC105838013	Cpr97Ea
LOC105840058	-2.50759	4.33768e-15	gene_15014	-2.11991	6.50446e-07	uncharacterized LOC105840058%2C transcript variant X2	CG3257
LOC105834868	-2.05209	6.06063e-32	gene_3958	-2.58927	5.73888e-09	neuroglobin	NA
LOC105835899	-2.07205	7.49952e-20	gene_2403	-2.56093	7.02331e-07	CUGBP Elav-like family member 4%2C transcript variant X6	bru3
LOC118646064	1.9427	2.78832e-15	gene_2854	2.73107	9.91313e-06	uncharacterized LOC118646064	NA
LOC118644727	1.76618	2.90365e-06	gene_9052	3.00145	2.08552e-10	uncharacterized LOC118644727	NA
LOC105832617	-2.4211	1.13375e-14	gene_6617	-2.1621	6.10098e-05	G-protein coupled receptor 52%2C transcript variant X3	DopEcR
LOC105830294	-1.78896	7.85244e-14	gene_8737	-2.92527	5.91161e-10	uncharacterized LOC105830294	CG30053
LOC105833436	-2.36077	1.2453e-20	gene_10286	-2.21489	9.53396e-05	diuretic hormone class 2	Dh31
LOC118644278	2.34855	0.0151318	gene_5989	2.19362	0.0462648	chymotrypsin-1-like	NA
LOC105833943	-2.14503	5.4314e-21	gene_141	-2.39018	1.00815e-08	whirlin%2C transcript variant X4	dysc
LOC105832394	-2.34315	3.90456e-21	gene_4441	-2.18457	0.00026012	neo-calmodulin%2C transcript variant X6	azot
LOC105830858	-1.99738	2.02948e-18	gene_5993	-2.54506	1.52744e-07	kinesin-like protein unc-104%2C transcript variant X8	unc-104
LOC105837291	-2.25435	7.88597e-24	gene_4886	-2.2472	2.91609e-06	zwei Ig domain protein zig-8%2C transcript variant X2	dpr12
LOC105830233	2.04469	0.00608933	gene_8776	2.46231	0.000233859	uncharacterized LOC105830233%2C transcript variant X1	CG7330
LOC105832863	-2.00869	7.73378e-19	gene_10811	-2.50098	3.53638e-05	uncharacterized LOC105832863	NA
LOC105836624	-2.13057	5.37631e-21	gene_11053	-2.34852	9.23774e-06	leucine-rich repeat and immunoglobulin-like domain-containing nogo receptor-interacting protein 1%2C transcript variant X1	CG1504
LOC114254395	-1.19358	5.06276e-10	gene_11109	-4.18938	1.03393e-08	uncharacterized LOC114254395%2C transcript variant X2	NA
LOC118644185	-2.34942	1.62397e-20	gene_15014	-2.11991	6.50446e-07	uncharacterized LOC118644185%2C transcript variant X2	CG3257
LOC105839922	-2.96172	5.05944e-22	gene_1545	-1.68012	0.00033679	dopamine receptor 1%2C transcript variant X1	Dop1R1
LOC105839468	-1.79857	1.18703e-18	gene_7266	-2.76649	7.45347e-05	ELKS/Rab6-interacting/CAST family member 1%2C transcript variant X7	brp
LOC105837733	1.75184	2.97887e-15	gene_11237	2.82719	7.74856e-05	circadian clock-controlled protein daywake	NA
LOC105831727	-2.25171	1.77825e-19	gene_5416	-2.19893	0.000762887	ras-related protein Rab-3%2C transcript variant X3	Rab3
LOC105834429	-2.25949	6.67623e-24	gene_7434	-2.19014	2.47045e-08	photoreceptor-specific nuclear receptor%2C transcript variant X2	Hr51
LOC118648341	-1.90376	5.76182e-17	gene_2474	-2.54177	4.91114e-05	calcium/calmodulin-dependent 3'%2C5'-cyclic nucleotide phosphodiesterase 1-like	Pde1c
LOC105828349	-2.2783	2.97891e-22	gene_6786	-2.11199	0.00127403	uncharacterized LOC105828349%2C transcript variant X4	jus
LOC118647768	-1.63928	1.0165e-17	gene_8737	-2.92527	5.91161e-10	uncharacterized LOC118647768	CG30053
LOC105828782	3.44565	6.32194e-25	gene_13586	1.3872	0.000631322	microtubule-associated protein futsch	CG30069
LOC105834267	-1.69513	2.49275e-19	gene_1635	-2.80747	6.5251e-10	microtubule-associated protein futsch%2C transcript variant X3	futsch
LOC105838359	-1.99807	1.80761e-21	gene_10240	-2.38069	3.34003e-05	potassium voltage-gated channel protein Shaker%2C transcript variant X7	Sh
LOC105839934	-1.98368	9.683e-24	gene_3987	-2.38907	2.87306e-07	JNK-interacting protein 1%2C transcript variant X3	Aplip1
LOC105830978	-2.141	5.62819e-13	gene_1835	-2.21146	0.00993159	aminopeptidase N	CG40470
LOC105834117	-1.99342	2.47139e-16	gene_2030	-2.35476	7.32518e-05	synapsin%2C transcript variant X2	Syn
LOC105836996	-1.94951	2.6937e-27	gene_1633	-2.40171	9.37648e-06	lymphocyte antigen 6D	CG8861
LOC118644109	-2.04906	5.02843e-16	gene_9787	-2.26716	0.000181769	nuclear receptor coactivator 5-like%2C transcript variant X1	NA
LOC105834335	-2.01234	9.35561e-30	gene_9506	-2.27979	2.26042e-07	uncharacterized LOC105834335%2C transcript variant X1	CG12502
LOC105835497	1.38657	1.3507e-09	gene_13507	3.30377	1.81848e-07	phenoloxidase 1	PPO3, PPO2, PPO1
LOC105832174	1.89865	7.92627e-11	gene_8415	2.41179	2.85968e-05	myogenesis-regulating glycosidase	tobi
LOC105834522	-1.95793	1.0755e-12	gene_1235	-2.33164	0.000188687	Kv channel-interacting protein 4	CG44422
LOC105831780	-2.27789	9.46936e-14	gene_9908	-2.00243	0.000108672	BAI1-associated protein 3%2C transcript variant X3	unc-13-4A
LOC105835246	-1.64508	7.22635e-17	gene_4999	-2.75888	2.06596e-08	teneurin-a	Ten-a
LOC105835161	-1.42374	1.72396e-13	gene_7472	-3.18575	9.07011e-08	cAMP-dependent protein kinase catalytic subunit 1	Pka-C1
LOC105828820	-2.02359	7.99736e-25	gene_14752	-2.2389	1.63354e-07	uncharacterized LOC105828820%2C transcript variant X1	NA
LOC105832864	-1.36323	2.41799e-15	gene_10473	-3.31818	7.18984e-07	uncharacterized LOC105832864	NA
LOC105831226	-1.89269	1.47122e-19	gene_5622	-2.38905	4.42908e-09	hemicentin-2%2C transcript variant X1	NA
LOC105828956	-1.62794	1.65607e-20	gene_14853	-2.76788	4.09149e-05	uncharacterized LOC105828956%2C transcript variant X2	CG9368
LOC105839344	-1.74534	1.23194e-10	gene_4035	-2.57943	3.16492e-07	serine-enriched protein%2C transcript variant X2	gprs
LOC105838651	-1.77867	1.23481e-08	gene_9961	-2.5045	2.77468e-06	glutamate decarboxylase%2C transcript variant X1	Gad1
LOC118644277	2.02389	0.000134897	gene_5989	2.19362	0.0462648	chymotrypsin-1-like	NA
LOC105830464	-2.20562	1.09568e-23	gene_3956	-2.00732	3.8895e-06	multiple coagulation factor deficiency protein 2 homolog%2C transcript variant X2	CG12817
LOC105838618	-1.99217	1.66979e-26	gene_9873	-2.22237	5.29386e-09	uncharacterized LOC105838618%2C transcript variant X5	CG17364
LOC105829256	-1.3921	4.1754e-16	gene_2022	-3.17446	4.83026e-08	uncharacterized LOC105829256%2C transcript variant X2	beat-VII
LOC105836374	-1.61655	8.64684e-19	gene_4101	-2.70292	6.13284e-08	neurotrimin	dpr11
LOC105832044	-2.36569	1.30869e-19	gene_1873	-1.84414	0.000236071	zwei Ig domain protein zig-8	dpr1
LOC105829370	-1.68889	1.10016e-12	gene_11638	-2.57514	5.73443e-07	uncharacterized LOC105829370	jeb
LOC105835414	-1.55624	2.18234e-17	gene_1487	-2.79209	1.46818e-08	MAP kinase-activating death domain protein	Rab3-GEF
LOC105840071	1.73457	5.82404e-13	gene_2921	2.4974	4.69071e-05	uncharacterized LOC105840071	NA
LOC105839929	-2.02807	1.54182e-24	gene_8635	-2.12845	1.35593e-06	synaptotagmin-14%2C transcript variant X3	Syt14
LOC105832128	-2.60713	6.80399e-26	gene_10747	-1.64455	0.00285304	acid sphingomyelinase-like phosphodiesterase 3b	CG32052
LOC105835728	-1.8151	1.21102e-16	gene_2801	-2.35761	3.4493e-09	dipeptidase 1	NA
LOC105832306	-1.56839	1.07408e-12	gene_12361	-2.7279	3.60995e-07	monocarboxylate transporter 12	Sln
LOC114254709	-1.68157	2.78333e-15	gene_2474	-2.54177	4.91114e-05	L-type lectin-domain containing receptor kinase S.7-like%2C transcript variant X29	Pde1c
LOC105831032	-1.83923	1.27544e-17	gene_4989	-2.32175	6.17522e-06	guanylate cyclase soluble subunit beta-1	Gycbeta100B
LOC105832290	1.58547	1.00934e-12	gene_1321	2.68669	4.47359e-07	uncharacterized LOC105832290	CG13458
LOC105836714	-2.42779	1.92732e-15	gene_15039	-1.74985	6.08448e-05	rho GTPase-activating protein 100F%2C transcript variant X11	RhoGAP100F
LOC105836444	-1.82031	2.93119e-15	gene_5907	-2.32465	3.16492e-07	zwei Ig domain protein zig-8	dpr8
LOC105838293	-1.65598	4.56658e-19	gene_8198	-2.55363	5.15123e-08	RNA-binding protein Musashi homolog Rbp6%2C transcript variant X3	Rbp6
LOC105837765	-2.45814	4.83357e-20	gene_309	-1.7111	1.44033e-05	hepatocyte nuclear factor 6%2C transcript variant X1	onecut
LOC105834909	-2.04943	8.56237e-21	gene_12830	-2.04821	8.23655e-06	calcium-dependent secretion activator%2C transcript variant X2	Cadps
LOC105831894	-2.07495	1.236e-18	gene_8959	-2.02203	0.00137723	choline O-acetyltransferase	ChAT
LOC105838296	-2.53603	7.15047e-19	gene_2780	-1.6521	6.56835e-07	GTP-binding protein Di-Ras2%2C transcript variant X7	CG30158
LOC105830972	-2.28848	3.095e-23	gene_12393	-1.8292	3.69134e-05	heparan sulfate glucosamine 3-O-sulfotransferase 5%2C transcript variant X2	Hs3st-A
LOC105831644	-1.6945	1.49944e-20	gene_498	-2.44391	1.47116e-07	FERM%2C ARHGEF and pleckstrin domain-containing protein 1%2C transcript variant X1	Cdep
LOC105829026	-1.10385	1.29626e-10	gene_10256	-3.74185	1.28887e-09	nephrin%2C transcript variant X1	side-III
LOC105839535	-1.68611	1.67975e-21	gene_7395	-2.41827	8.98731e-08	neuroligin-1	Nlg2
LOC105837326	-2.205	1.34189e-15	gene_11480	-1.84379	0.000447387	uncharacterized LOC105837326%2C transcript variant X1	CG3955
LOC105835908	1.70068	7.13335e-11	gene_2404	2.38683	8.53502e-09	uncharacterized LOC105835908%2C transcript variant X2	NA
LOC105831416	3.56914	7.89162e-20	gene_13698	1.12966	0.0305336	uncharacterized LOC105831416	CG13857
LOC105840002	-1.85791	9.13425e-21	gene_6417	-2.16412	3.04325e-07	gamma-aminobutyric acid type B receptor subunit 1%2C transcript variant X6	GABA-B-R1
LOC105838638	-2.23487	1.11872e-19	gene_14716	-1.78396	0.000416138	uncharacterized LOC105838638	7B2
LOC105836476	1.17555	0.000134043	gene_2671	3.37986	7.24357e-05	protein obstructor-E	NA
LOC105839353	-1.77231	4.12595e-12	gene_13197	-2.23119	2.39851e-07	Down syndrome cell adhesion molecule-like protein Dscam2%2C transcript variant X2	Dscam4
LOC105828913	-1.58313	4.31519e-11	gene_11547	-2.47773	2.79369e-06	uncharacterized LOC105828913	beat-Ib, beat-Ic, beat-Ia
LOC105837420	-1.71748	1.46955e-12	gene_1194	-2.26799	3.61107e-05	inositol polyphosphate-5-phosphatase A%2C transcript variant X17	5PtaseI
LOC105829680	1.86409	3.60171e-06	gene_5990	2.08052	0.0424855	transmembrane protease serine 9	NA
LOC105833891	-2.05896	1.16408e-08	gene_13293	-1.87689	0.000426146	uncharacterized LOC105833891%2C transcript variant X1	NA
LOC105837869	-2.3515	1.69102e-21	gene_12967	-1.63385	0.000191458	prohormone-2%2C transcript variant X1	NA
LOC105830697	-2.27794	1.43961e-23	gene_7500	-1.68571	0.000194007	protein tipE%2C transcript variant X1	tipE
LOC105837238	1.55566	0.013845	gene_8706	2.46113	0.000494235	uncharacterized LOC105837238%2C transcript variant X5	NA
LOC105832672	-1.88364	2.67822e-13	gene_6116	-2.02943	0.0049354	cysteine-rich secretory protein 1%2C transcript variant X5	NA
LOC105835403	1.49838	0.0028539	gene_6730	2.54175	0.0333825	lysozyme 2	CG6426, CG6435, CG6421
LOC105834973	-1.66733	3.77898e-25	gene_5146	-2.27641	8.13018e-09	neurexin-1%2C transcript variant X5	Nrx-1
LOC105833920	-1.38793	8.75014e-18	gene_13070	-2.72957	4.1815e-09	sodium channel protein 60E%2C transcript variant X1	NaCP60E
LOC105837312	1.78876	2.40191e-20	gene_14351	2.11554	6.07227e-07	uncharacterized LOC105837312%2C transcript variant X2	CG1674
LOC105830417	-2.06991	1.59891e-23	gene_15200	-1.82723	0.00033933	1-acyl-sn-glycerol-3-phosphate acyltransferase alpha	Agpat1
LOC105835366	-2.35935	1.27115e-24	gene_13850	-1.60286	0.000664368	galactoside alpha-(1%2C2)-fucosyltransferase 1	NA
LOC105835715	2.67865	4.72152e-25	gene_12173	1.41012	1.91453e-09	interaptin%2C transcript variant X1	CG4213
LOC105836473	1.59654	0.0020024	gene_2900	2.3632	5.50758e-06	protein obstructor-E%2C transcript variant X3	NA
LOC105836415	1.86064	5.47498e-21	gene_3048	2.02776	1.62004e-05	tubulin alpha-1 chain	NA
LOC105839847	-1.6548	1.89808e-10	gene_9786	-2.26482	0.00232964	voltage-dependent L-type calcium channel subunit beta-2%2C transcript variant X4	Ca-beta
LOC105838395	1.12411	0.00294774	gene_1578	3.33092	0.0284419	peritrophin-1	CG11570
LOC118644183	1.96495	0.0027133	gene_13729	1.89813	0.023861	uncharacterized LOC118644183	CG4998
LOC105838467	-1.35492	2.14871e-09	gene_12536	-2.74729	7.7757e-10	NACHT domain- and WD repeat-containing protein 1	CG30116
LOC105831456	-1.37484	1.97995e-19	gene_3036	-2.698	5.31237e-10	putative FERM domain-containing protein FRMD8P1%2C transcript variant X1	Bili
LOC105833362	-2.27513	3.27737e-22	gene_6583	-1.62023	0.000938942	protein kinase C%2C brain isozyme%2C transcript variant X1	inaC, Pkc53E
LOC118644029	-2.19341	1.14122e-26	gene_8958	-1.67086	0.00215753	vesicular acetylcholine transporter	VAChT
LOC105832746	-1.90571	2.71544e-19	gene_3951	-1.92251	3.91033e-05	neuropeptide-like 1%2C transcript variant X1	NA
LOC118648646	-1.43808	1.05778e-06	gene_2474	-2.54177	4.91114e-05	calcium/calmodulin-dependent 3'%2C5'-cyclic nucleotide phosphodiesterase 1-like	Pde1c
LOC105839020	-1.37891	2.51957e-10	gene_2745	-2.64942	7.90066e-08	solute carrier family 12 member 4%2C transcript variant X2	kcc
LOC105836344	-1.87086	1.4131e-25	gene_12562	-1.95268	7.13602e-09	apical junction component 1 homolog%2C transcript variant X2	CG42748
LOC105837723	-1.73223	5.19171e-17	gene_6620	-2.09627	6.952e-11	potassium channel subfamily T member 1%2C transcript variant X3	SLO2
LOC105838502	-1.48384	1.54055e-15	gene_6113	-2.4399	1.67591e-08	protein retinal degeneration B%2C transcript variant X4	rdgB
LOC105835642	-1.65519	1.09945e-24	gene_14282	-2.18689	1.61123e-08	putative thiamine transporter SLC35F3%2C transcript variant X6	CG42322
LOC105828354	-1.91263	3.21907e-27	gene_13226	-1.88894	7.60711e-09	ALK tyrosine kinase receptor%2C transcript variant X1	Alk
LOC105837155	-1.96091	2.35609e-22	gene_2759	-1.84232	6.59117e-05	synaptic vesicular amine transporter%2C transcript variant X1	Vmat
LOC105834080	-1.8894	1.06469e-15	gene_9219	-1.91199	5.7175e-05	uncharacterized LOC105834080%2C transcript variant X2	rad
LOC105836407	3.57564	2.89468e-21	gene_6029	1.00987	0.00681126	uncharacterized LOC105836407	NA
LOC105828967	-2.17012	1.11522e-17	gene_4038	-1.65994	5.34386e-08	uncharacterized LOC105828967%2C transcript variant X1	NA
LOC105828747	1.43032	4.85112e-08	gene_2751	2.51195	4.33752e-07	uncharacterized LOC105828747%2C transcript variant X2	NA
LOC105837474	1.08539	6.64116e-08	gene_7214	3.30366	9.29384e-18	SET domain-containing protein SmydA-8	SmydA-6
LOC105836443	-2.18246	4.88772e-26	gene_5898	-1.64056	7.14229e-07	protein O-mannosyl-transferase TMTC1%2C transcript variant X1	NA
LOC105831516	1.50286	2.28014e-15	gene_7619	2.36731	1.75193e-09	prostaglandin E synthase 2	Su_P_
LOC105836141	1.08445	7.37912e-05	gene_14900	3.27699	2.27348e-11	NADH-ubiquinone oxidoreductase 49 kDa subunit	ND-49, ND-49L
LOC105829423	-1.87284	1.81168e-15	gene_12039	-1.88771	1.1305e-08	sodium- and chloride-dependent transporter XTRP3%2C transcript variant X1	CG43066
LOC105832014	2.26617	5.32924e-10	gene_8877	1.55784	1.9877e-06	sulfotransferase 1C4	NA
LOC105838032	-1.05516	2.28221e-09	gene_9978	-3.34139	7.16269e-12	uncharacterized LOC105838032%2C transcript variant X2	CG4133
LOC105839611	-1.68179	1.1515e-18	gene_9302	-2.09312	1.02473e-06	zinc finger protein 853%2C transcript variant X2	CG12605
LOC105839332	-1.76503	4.86565e-19	gene_12773	-1.98507	8.80573e-05	neural-cadherin%2C transcript variant X8	CadN2, CadN
LOC105836186	-1.9581	5.09467e-19	gene_7100	-1.7871	0.000212397	uncharacterized LOC105836186	NA
LOC105833892	-1.77667	7.40947e-16	gene_10117	-1.96835	3.14213e-07	nephrin%2C transcript variant X3	NA
LOC105837722	-1.23983	1.29651e-10	gene_9932	-2.82033	5.80551e-08	multiple C2 and transmembrane domain-containing protein%2C transcript variant X12	Mctp
LOC105839983	-1.56309	8.99933e-22	gene_14847	-2.23268	4.31709e-09	zwei Ig domain protein zig-8%2C transcript variant X4	dpr9
LOC118646254	-1.76658	8.65358e-12	gene_11302	-1.97327	8.56002e-06	integumentary mucin C.1-like	NA
LOC105828867	-1.13563	0.000170948	gene_2322	-3.06007	5.77215e-05	uncharacterized LOC105828867	NA
LOC105833215	-2.21598	7.83232e-27	gene_1176	-1.56791	0.000304317	tachykinins%2C transcript variant X4	Tk
LOC105841161	1.17545	2.77933e-08	gene_9370	2.94694	5.02355e-05	vitamin K-dependent protein C	NA
LOC105837985	-1.96602	2.9862e-20	gene_668	-1.7606	1.63291e-05	protein stoned-B	stnB
LOC105831724	-1.11243	3.15313e-09	gene_5418	-3.08348	1.90725e-05	myb-like protein AA	NA
LOC105838746	-1.59671	3.11605e-18	gene_4906	-2.13972	5.1729e-07	electroneutral sodium bicarbonate exchanger 1%2C transcript variant X12	Ndae1
LOC105834210	-1.80306	7.184e-22	gene_9346	-1.88717	4.44036e-07	uncharacterized LOC105834210%2C transcript variant X2	NA
LOC105837847	-2.02153	1.00867e-19	gene_10141	-1.66825	0.00018693	uncharacterized LOC105837847%2C transcript variant X1	NA
LOC105834028	1.30424	3.12089e-09	gene_3741	2.57759	4.27075e-08	tubulin polyglutamylase TTLL4%2C transcript variant X2	TTLL4B, TTLL4A
LOC105832822	1.60032	2.58177e-15	gene_10613	2.08853	3.52728e-05	probable histone-binding protein Caf1%2C transcript variant X1	Caf1-55
LOC105831026	-1.35167	4.03924e-23	gene_5569	-2.4678	7.00852e-09	neurobeachin%2C transcript variant X2	rg
LOC118646426	1.44459	5.54701e-11	gene_985	2.30382	1.65345e-07	acylphosphatase-2	CG14022
LOC118648311	1.51079	3.23454e-05	gene_5989	2.19362	0.0462648	chymotrypsin-1-like	NA
LOC105831140	-1.43546	6.60031e-13	gene_9401	-2.30185	1.67296e-07	RING finger protein 207%2C transcript variant X2	NA
LOC105838773	-2.09379	1.76945e-21	gene_15045	-1.57368	4.33748e-05	cationic amino acid transporter 2%2C transcript variant X2	CG12531
LOC105830998	-1.99612	1.15751e-23	gene_15170	-1.64724	0.000216815	uncharacterized LOC105830998%2C transcript variant X2	CG31191
LOC105831729	-1.48131	4.74169e-20	gene_451	-2.21772	4.46562e-08	uncharacterized LOC105831729%2C transcript variant X17	X11Lbeta, X11L
LOC118644084	1.68	4.60948e-08	gene_4174	1.95483	4.91403e-14	xyloside xylosyltransferase 1-like	Xxylt
LOC105838196	-1.36353	5.26922e-13	gene_6452	-2.39849	1.42121e-07	potassium voltage-gated channel protein Shaw%2C transcript variant X2	Shaw
LOC105831822	2.55054	2.24783e-20	gene_4891	1.2809	0.0160675	myophilin	Chd64
LOC105838343	-1.96133	2.60944e-21	gene_12794	-1.65339	3.40887e-05	regulator of G-protein signaling 7%2C transcript variant X2	RSG7
LOC105838572	-1.75043	4.87528e-10	gene_686	-1.85239	5.1297e-05	uncharacterized LOC105838572	NA
LOC105828325	1.46018	4.53954e-13	gene_13279	2.21902	1.04644e-06	rRNA 2'-O-methyltransferase fibrillarin	CG10909
LOC105835067	1.72647	1.09758e-11	gene_9180	1.87587	0.00122634	chitooligosaccharidolytic beta-N-acetylglucosaminidase%2C transcript variant X1	Hexo1
LOC105834093	1.55956	0.00343462	gene_13228	2.07408	5.05745e-06	retinol dehydrogenase 12	NA
LOC105838369	-1.65388	8.58284e-18	gene_3872	-1.95526	1.41442e-09	alpha-tubulin N-acetyltransferase	Tat, CG17003
LOC105839969	1.71212	0.00386425	gene_11277	1.88714	0.0142016	circadian clock-controlled protein daywake%2C transcript variant X2	NA
LOC105839222	1.30614	2.86259e-20	gene_15056	2.47266	2.23028e-12	ATPase family AAA domain-containing protein 3A homolog	bor
LOC105831179	1.16159	1.96681e-05	gene_605	2.77385	9.07945e-07	alpha-crystallin B chain%2C transcript variant X2	CG14207
LOC105840118	-2.21114	3.62383e-27	gene_4025	-1.45636	0.00010661	uncharacterized LOC105840118%2C transcript variant X5	NA
LOC105835901	-1.35818	4.37177e-12	gene_2334	-2.36442	2.1893e-07	protein unc-80 homolog%2C transcript variant X1	unc80
LOC105839675	-1.38835	5.89768e-21	gene_13519	-2.28318	2.07529e-08	uncharacterized LOC105839675%2C transcript variant X1	Schip1
LOC105839224	-1.62989	6.11191e-24	gene_4951	-1.92622	5.52029e-05	ecdysone-induced protein 78C%2C transcript variant X3	Eip78C
LOC105834830	-1.35141	6.53846e-15	gene_7440	-2.32141	4.81654e-09	potassium voltage-gated channel protein Shal%2C transcript variant X12	Shal
LOC105829409	-2.10342	3.47772e-22	gene_13529	-1.48882	0.0058039	dopamine N-acetyltransferase%2C transcript variant X1	AANATL7
LOC105831888	1.51222	2.08857e-07	gene_9294	2.05757	4.09964e-07	uncharacterized LOC105831888	CG30380
LOC105839860	-2.09227	8.5825e-24	gene_12524	-1.47608	0.000215558	uncharacterized LOC105839860	fid
LOC105833259	-1.74332	9.9811e-19	gene_3907	-1.76966	7.36786e-09	calmodulin-binding transcription activator 1%2C transcript variant X5	Camta
LOC105838249	-2.06238	3.52063e-14	gene_6801	-1.49183	0.017461	short neuropeptide F%2C transcript variant X1	NA
LOC105836682	-1.85494	5.84807e-08	gene_6638	-1.655	0.0119768	PI-PLC X domain-containing protein 1%2C transcript variant X6	CG5895
LOC105835702	-1.78909	2.42483e-13	gene_4103	-1.71138	0.00137247	sodium- and chloride-dependent GABA transporter 1%2C transcript variant X2	Gat
LOC105838041	1.26856	7.53288e-07	gene_1728	2.38463	1.67743e-09	methyltransferase-like protein 23	CG5013
LOC118644243	1.37075	0.0357746	gene_14789	2.20493	3.9467e-07	nucleoside diphosphate kinase-like	awd
LOC105829483	-1.78743	4.33359e-17	gene_8421	-1.69033	5.29386e-09	RIMS-binding protein 2%2C transcript variant X23	Rbp
LOC105837923	-2.2014	3.49101e-18	gene_7943	-1.36722	0.000229454	uncharacterized LOC105837923	dtr
LOC105839152	-1.30441	8.04754e-13	gene_689	-2.30431	3.23224e-08	uncharacterized LOC105839152%2C transcript variant X4	NA
LOC105836432	-2.34461	2.96323e-19	gene_10334	-1.27498	0.00483569	neuroendocrine convertase 2	amon
LOC105830784	-1.54995	9.18774e-15	gene_9390	-1.92527	4.01482e-07	O-phosphoseryl-tRNA(Sec) selenium transferase%2C transcript variant X5	SecS
LOC105831779	-1.45258	1.15751e-23	gene_14037	-2.0535	4.68758e-09	nephrin%2C transcript variant X5	side-VIII
LOC105839980	1.63028	4.62619e-16	gene_12956	1.82402	0.00201397	fructose-1%2C6-bisphosphatase 1	fbp
LOC105836397	-1.775	1.07378e-23	gene_5581	-1.67269	1.00008e-05	neurotrimin%2C transcript variant X1	DIP-iota, DIP-eta
LOC105837787	-1.92789	1.72374e-10	gene_9639	-1.53796	0.0395314	protein madd-4%2C transcript variant X1	nolo
LOC105833124	-1.68954	1.12693e-21	gene_115	-1.75346	1.6781e-07	uncharacterized LOC105833124%2C transcript variant X2	NA
LOC105833113	-1.07055	1.38405e-10	gene_1712	-2.75358	1.66297e-10	peripheral plasma membrane protein CASK%2C transcript variant X10	CASK
LOC105839094	-1.37728	4.86203e-18	gene_12079	-2.13845	6.03914e-06	guanine nucleotide-binding protein G(s) subunit alpha	Galphas
LOC105837690	-1.57334	6.41548e-22	gene_9034	-1.86206	3.44305e-06	high affinity choline transporter 1	NA
LOC105830427	-1.65484	1.54284e-11	gene_10316	-1.76036	1.80825e-06	receptor-type guanylate cyclase daf-11%2C transcript variant X6	NA
LOC105835625	-1.95772	1.09642e-19	gene_9874	-1.48661	0.000335702	uncharacterized LOC105835625	NA
LOC105839486	1.78559	1.09028e-05	gene_11585	1.62983	0.00811764	UDP-glucosyltransferase 2	Ugt50B3
LOC105839497	-1.41913	9.63971e-08	gene_165	-2.05036	3.61865e-05	acetylcholinesterase%2C transcript variant X2	NA
LOC105840746	1.68961	1.15537e-15	gene_3968	1.71965	6.85202e-06	uncharacterized LOC105840746%2C transcript variant X2	NA
LOC105836790	-1.42011	9.8472e-19	gene_12879	-2.03238	4.96481e-08	GATA-binding factor C%2C transcript variant X1	grn
LOC105833893	-1.51871	1.2903e-14	gene_12065	-1.89791	0.00148936	calcium/calmodulin-dependent protein kinase type II alpha chain%2C transcript variant X20	CaMKII
LOC105833704	-1.41092	4.07177e-17	gene_9732	-2.04006	3.94895e-06	protein couch potato%2C transcript variant X1	cpo
LOC105835820	-2.16256	7.16313e-28	gene_7987	-1.32848	0.00010702	uncharacterized LOC105835820%2C transcript variant X5	NA
LOC105833530	-1.63844	2.80441e-18	gene_8399	-1.74828	0.000229454	regulator of G-protein signaling 17%2C transcript variant X4	Dhit
LOC105838939	-2.20556	9.32685e-19	gene_3982	-1.29478	0.00779575	glutamate receptor 1%2C transcript variant X1	GluRIA, GluRIB
LOC105833228	-1.5817	1.02561e-19	gene_9287	-1.8049	0.00784646	acidic mammalian chitinase%2C transcript variant X4	Cht11
LOC105830491	-1.35785	6.75113e-16	gene_13542	-2.10025	3.82583e-07	octopamine receptor beta-1R%2C transcript variant X2	Octbeta1R
LOC105836546	-1.19434	3.80532e-17	gene_9628	-2.38112	1.34287e-08	diuretic hormone receptor%2C transcript variant X1	Dh44-R1, Dh44-R2
LOC105828798	1.21051	0.00296334	gene_1495	2.34601	0.00156392	maltase 1	Mal-A1, Mal-A6, Mal-A7, Mal-A8, Mal-A2, Mal-A5, Mal-A4, Mal-A3, Mal-B2, Mal-B1
LOC118645209	-1.0258	2.22447e-09	gene_9898	-2.75379	1.11277e-07	uncharacterized LOC118645209	NA
LOC105839918	-1.64134	9.97384e-17	gene_10352	-1.71604	1.03255e-08	synaptosomal-associated protein 25%2C transcript variant X2	Snap24, Snap25
LOC105835854	-1.23975	2.16277e-23	gene_11214	-2.27044	2.78505e-07	uncharacterized LOC105835854	NA
LOC105831501	1.35016	2.88903e-09	gene_7616	2.0814	0.000308649	uncharacterized LOC105831501%2C transcript variant X1	CG14301
LOC105834894	1.35496	8.3911e-17	gene_9719	2.07014	3.32338e-10	39S ribosomal protein L12%2C mitochondrial	mRpL12
LOC105839768	-2.12088	1.37742e-14	gene_11251	-1.32036	0.000111235	acetylcholine receptor subunit alpha-L1	nAChRalpha2
LOC105831224	-1.38195	3.42732e-16	gene_3802	-2.0219	8.52873e-06	uncharacterized LOC105831224%2C transcript variant X2	CG9395
LOC105832148	-1.4114	4.80205e-15	gene_10964	-1.97944	1.99892e-08	phosphatase and actin regulator 4%2C transcript variant X5	CG32264
LOC105841145	-1.93326	5.48269e-11	gene_1398	-1.44483	0.00199972	trichohyalin	NA
LOC105838102	-2.3349	3.44578e-27	gene_1670	-1.19452	0.00525304	LIM domain only protein 3%2C transcript variant X1	Bx
LOC105832503	-1.41531	9.82464e-25	gene_5586	-1.9696	1.29231e-07	syntaxin-binding protein 5%2C transcript variant X4	Tomosyn
LOC105833207	-2.36659	6.92414e-29	gene_14041	-1.17504	0.00184517	pikachurin	SP2353
LOC105836539	1.78049	6.5266e-16	gene_9942	1.56102	0.000523387	rhythmically expressed gene 5 protein	Reg-5
LOC105835085	-1.29906	1.30338e-14	gene_13089	-2.13896	1.38252e-06	SLIT-ROBO Rho GTPase-activating protein 1%2C transcript variant X9	NA
LOC105829381	-2.19604	8.51007e-17	gene_8960	-1.26422	0.000878777	high-affinity choline transporter 1	ChT
LOC105831442	1.23758	0.0460908	gene_8940	2.22829	4.06047e-05	uncharacterized LOC105831442%2C transcript variant X3	CG8192
LOC105834832	1.44693	1.17363e-05	gene_13729	1.89813	0.023861	uncharacterized LOC105834832	CG4998
LOC105833168	-1.26392	1.55975e-14	gene_1678	-2.16127	1.36684e-06	uncharacterized LOC105833168	NA
LOC105837188	1.06628	1.13182e-05	gene_8915	2.55813	1.31224e-07	serine protease inhibitor 88Ea	Spn88Ea, Spn88Eb
LOC105830339	-1.22709	3.37241e-15	gene_2401	-2.22278	0.000135633	tetraspanin-11%2C transcript variant X1	NA
LOC105831005	1.1202	2.3838e-06	gene_9973	2.43223	0.0316599	chymotrypsin-1	CG7142, Phae2, Phae1, CG11911, CG11912
LOC118645293	-1.593	2.87309e-12	gene_4231	-1.70274	0.000838897	uncharacterized LOC118645293	NA
LOC105837999	1.08726	1.34076e-07	gene_9882	2.4808	0.000117818	collagen alpha-1(IV) chain%2C transcript variant X2	prc
LOC105834967	-1.26324	4.15717e-14	gene_13680	-2.13405	2.41645e-05	sodium-coupled monocarboxylate transporter 1	NA
LOC105838211	-1.99705	2.0127e-15	gene_8608	-1.34597	0.00736693	oxysterol-binding protein-related protein 2	CG3860
LOC105833440	-1.8158	1.4018e-18	gene_10291	-1.47579	0.00111579	locomotion-related protein Hikaru genki	hig
LOC105828203	-1.30265	6.65996e-16	gene_10529	-2.05067	9.9056e-07	1-phosphatidylinositol 4%2C5-bisphosphate phosphodiesterase classes I and II%2C transcript variant X3	Plc21C
LOC105836964	-1.67397	1.18745e-14	gene_6040	-1.59518	0.00219106	GTPase-activating Rap/Ran-GAP domain-like protein 3%2C transcript variant X2	NA
LOC105834581	-1.76629	3.26685e-20	gene_13815	-1.50642	0.00194816	tubulin polymerization-promoting protein homolog%2C transcript variant X16	NA
LOC105837285	-2.38968	1.32706e-24	gene_9728	-1.11328	2.99188e-07	glutamate receptor ionotropic%2C NMDA 2B%2C transcript variant X6	Nmdar2
LOC105837206	-1.18592	1.00502e-13	gene_11879	-2.23714	2.06995e-06	uncharacterized LOC105837206%2C transcript variant X2	Corin
LOC105830704	1.19775	6.60031e-13	gene_291	2.20864	5.12928e-10	probable cytosolic oligopeptidase A	CG11771
LOC105838753	-1.83162	1.01621e-18	gene_2706	-1.44196	6.45031e-05	limbic system-associated membrane protein	dpr19
LOC105829579	1.13002	4.14774e-11	gene_4968	2.33134	4.0167e-09	39S ribosomal protein L15%2C mitochondrial	mRpL15
LOC105837319	-1.99857	1.93834e-13	gene_14096	-1.31562	0.00213917	progestin and adipoQ receptor family member 4%2C transcript variant X1	CG33203
LOC105833649	-2.16346	5.8419e-24	gene_8599	-1.21351	3.8746e-05	neuroligin-4%2C X-linked	Nlg3
LOC105828693	1.22404	2.73048e-15	gene_11105	2.1283	3.06085e-09	mRNA turnover protein 4 homolog	RpLP0-like
LOC105836460	1.59777	0.00416527	gene_2670	1.62574	0.0288853	protein obstructor-E	obst-A
LOC105840738	-1.40655	1.24087e-24	gene_7158	-1.84314	7.38064e-07	retinal homeobox protein Rx-A%2C transcript variant X2	repo
LOC105833580	-1.26538	3.08247e-17	gene_1435	-2.04561	8.7055e-13	zinc finger homeobox protein 4%2C transcript variant X4	zfh2
LOC105829103	-1.44256	5.17226e-11	gene_10682	-1.79216	3.09542e-07	longitudinals lacking protein%2C isoforms H/M/V%2C transcript variant X2	NA
LOC105834915	-1.33505	1.32515e-20	gene_15063	-1.93215	1.15994e-05	uncharacterized LOC105834915%2C transcript variant X2	NA
LOC105838488	-2.36038	6.76645e-28	gene_8002	-1.09162	1.1478e-06	homeobox protein 5%2C transcript variant X3	CG43689
LOC105834237	-2.28121	4.49018e-27	gene_9507	-1.11841	8.48918e-06	dipeptidase 1%2C transcript variant X1	NA
LOC105836030	1.21371	7.13345e-18	gene_9397	2.09666	0.00561137	uncharacterized LOC105836030	CG15449, CG44325
LOC105830989	-1.93153	6.16008e-16	gene_14619	-1.31702	0.000582262	vesicular glutamate transporter 1	VGlut
LOC105836968	-1.27382	2.31817e-09	gene_4219	-1.99673	1.0779e-07	neprilysin-4%2C transcript variant X4	Nep4
LOC105828179	-2.34887	4.11238e-24	gene_10698	-1.08254	0.00215664	juvenile hormone acid O-methyltransferase%2C transcript variant X4	jhamt
LOC105830031	-1.93946	6.90181e-10	gene_7161	-1.30978	0.0193575	pro-corazonin	Crz
LOC105834482	-1.22322	4.55679e-13	gene_6785	-2.06779	0.000790865	uncharacterized LOC105834482%2C transcript variant X1	NA
LOC105831151	-1.92936	2.7909e-22	gene_9737	-1.31027	3.16492e-07	POU domain%2C class 6%2C transcription factor 1%2C transcript variant X1	pdm3
LOC105830891	-1.34623	1.36343e-10	gene_12520	-1.8695	8.65708e-05	uncharacterized LOC105830891	CG32544
LOC105836947	-1.42472	2.97008e-17	gene_11143	-1.7638	6.45406e-07	uncharacterized LOC105836947%2C transcript variant X1	CG31051
LOC105837737	-1.13398	4.8945e-19	gene_6871	-2.21422	2.28108e-06	zwei Ig domain protein zig-8%2C transcript variant X9	dpr8
LOC105837950	-1.74138	1.47393e-17	gene_2872	-1.43957	1.92367e-05	regulator of G-protein signaling 9%2C transcript variant X8	CG42450
LOC105839483	1.13264	0.000191328	gene_11597	2.20625	4.35992e-05	proteoglycan 4%2C transcript variant X2	NA
LOC105839370	-1.0878	2.37962e-12	gene_9270	-2.28983	6.19856e-06	follistatin-related protein 5%2C transcript variant X8	NA
LOC105837790	-1.06735	1.6863e-07	gene_12586	-2.32967	4.15061e-08	rabphilin-3A%2C transcript variant X2	Rph
LOC118648777	-1.28246	3.25732e-15	gene_4951	-1.92622	5.52029e-05	ecdysone-induced protein 78C-like	Eip78C
LOC105833003	1.31538	3.07075e-15	gene_10358	1.87627	0.00304015	cyclin-dependent kinases regulatory subunit	Cks30A
LOC105839869	-1.61249	1.43961e-23	gene_623	-1.52221	0.000233859	uncharacterized LOC105839869%2C transcript variant X11	CG15894
LOC105830096	-1.64729	3.55993e-18	gene_2167	-1.48518	5.94565e-06	zinc finger and BTB domain-containing protein 14%2C transcript variant X24	NA
LOC105840234	1.39934	8.97035e-18	gene_3699	1.74492	5.80551e-08	protein l(2)37Cc	l_2_37Cc
LOC105832567	-1.58366	6.33381e-21	gene_1872	-1.54036	6.16322e-06	lachesin%2C transcript variant X3	DIP-alpha
LOC105835871	-1.56378	8.99933e-22	gene_12420	-1.55895	5.66557e-08	endophilin-A%2C transcript variant X7	EndoA
LOC105836202	-2.24188	1.06071e-18	gene_2035	-1.08044	9.7405e-05	sodium- and chloride-dependent GABA transporter 1%2C transcript variant X2	NA
LOC105839089	-2.15231	1.17945e-27	gene_14178	-1.12361	1.98451e-07	acetylcholine receptor subunit beta-like 2	nAChRbeta2
LOC114255378	1.45496	4.30073e-08	gene_8407	1.65902	0.000970598	uncharacterized LOC114255378	rtv
LOC105834291	-1.87582	1.35432e-26	gene_3992	-1.28358	0.000230944	discoidin domain-containing receptor 2%2C transcript variant X2	NA
LOC105840127	1.99364	1.99829e-22	gene_1102	1.20738	0.00336217	leucine-rich repeat extensin-like protein 5%2C transcript variant X1	CG8086
LOC105836815	-1.77919	9.35561e-30	gene_6822	-1.33425	1.75128e-09	DNA-binding protein P3A2%2C transcript variant X6	ewg
LOC105835893	-1.53045	2.10142e-13	gene_1701	-1.54689	4.51716e-05	tyrosine-protein phosphatase non-receptor type 5%2C transcript variant X2	NA
LOC105830410	1.55459	0.000168243	gene_6388	1.52189	2.92309e-07	peroxidase%2C transcript variant X3	cysu
LOC105840160	-1.15297	3.05521e-12	gene_9381	-2.03557	3.43703e-08	tyrosine-protein phosphatase Lar%2C transcript variant X2	Lar
LOC105835500	1.78024	3.39578e-13	gene_13209	1.31719	0.000170458	unconventional myosin-XVIIIa%2C transcript variant X4	Mhcl
LOC105841107	-1.08607	2.80442e-11	gene_3795	-2.15038	6.43703e-07	discoidin domain-containing receptor 2%2C transcript variant X3	NA
LOC105832023	-1.81888	1.71824e-27	gene_9118	-1.28386	0.00136756	Kv channel-interacting protein 1	CG5890
LOC105828415	-1.28115	6.36787e-19	gene_10149	-1.82245	6.79967e-06	frequenin-1	Frq1, Frq2
LOC105828392	-1.31475	4.55574e-20	gene_1150	-1.76879	5.84324e-06	phospholipid phosphatase 5	CG12746
LOC105836380	-1.99927	3.39782e-23	gene_13541	-1.16298	1.77264e-06	octopamine receptor beta-3R%2C transcript variant X15	Octbeta3R
LOC105833146	-1.7667	2.02679e-20	gene_3621	-1.31564	0.000110558	transmembrane protein 132E%2C transcript variant X1	dtn
LOC105834787	-1.32079	2.78955e-14	gene_15290	-1.75834	4.58479e-05	uncharacterized LOC105834787	NA
LOC105831575	-1.30137	2.78293e-17	gene_9141	-1.78187	1.14821e-06	zinc finger protein 37 homolog%2C transcript variant X5	NA
LOC105833050	1.27378	6.63743e-06	gene_4132	1.81484	0.000134421	slit homolog 1 protein	CG5096
LOC105831759	-1.035	3.97886e-12	gene_4148	-2.22797	2.09552e-07	putative fatty acyl-CoA reductase CG5065	CG4770
LOC105832608	1.33439	7.68458e-12	gene_9619	1.72723	7.13731e-08	probable isocitrate dehydrogenase [NAD] subunit alpha%2C mitochondrial	Idh3a, CG32026, CG3483
LOC105837651	1.04437	2.91544e-16	gene_9824	2.19433	1.23312e-06	protein BCCIP homolog	CG9286
LOC105828680	-1.17831	1.31479e-08	gene_9592	-1.9424	5.69409e-09	laccase-12	CG11504
LOC105832993	-2.03196	8.3422e-21	gene_6344	-1.12216	6.56828e-06	acetylcholine receptor subunit alpha-like%2C transcript variant X3	nAChRalpha3
LOC105840102	1.20201	1.0783e-11	gene_5363	1.89617	4.77593e-11	prohibitin-2	Phb2
LOC105834874	-1.70801	1.51987e-24	gene_3145	-1.33021	0.00342738	voltage-dependent calcium channel subunit alpha-2/delta-3%2C transcript variant X1	stj
LOC105830729	1.45017	1.80111e-15	gene_14008	1.56366	6.21685e-05	centromere-associated protein E	CG5080
LOC105839892	-1.09612	1.98174e-09	gene_13948	-2.06778	1.71835e-06	protein O-mannosyl-transferase TMTC2%2C transcript variant X1	CG4341, CG31690
LOC114253702	1.42672	0.00360713	gene_14014	1.58482	0.00648024	sphingomyelin phosphodiesterase 1	CG15533, CG15534
LOC114255011	-1.30427	2.96469e-15	gene_15370	-1.72699	6.12246e-07	uncharacterized LOC114255011	NA
LOC105839921	1.01018	6.72196e-13	gene_10353	2.22822	8.02156e-09	complement component 1 Q subcomponent-binding protein%2C mitochondrial	P32
LOC105836049	-1.89681	5.10748e-17	gene_2324	-1.18353	0.00673459	uncharacterized LOC105836049%2C transcript variant X3	CG14275, CG7781
LOC105836301	1.51359	1.6009e-09	gene_9658	1.48189	0.000582262	queuosine salvage protein	CG9752
LOC105833011	1.01786	3.28887e-11	gene_11764	2.19782	6.29813e-09	dihydrolipoyl dehydrogenase%2C mitochondrial	CG7430
LOC105837301	1.00891	6.6172e-10	gene_4756	2.21438	8.53502e-09	uncharacterized LOC105837301%2C transcript variant X1	mRpS11
LOC105835662	1.59349	3.50974e-06	gene_696	1.4016	0.00134015	sodium/potassium/calcium exchanger 4	zyd
LOC105831672	1.08731	6.23905e-11	gene_15451	2.03044	5.79565e-06	mitochondrial import inner membrane translocase subunit Tim23%2C transcript variant X2	Tim23
LOC105833785	1.53876	1.93862e-24	gene_7343	1.43256	0.000123769	protein claret segregational%2C transcript variant X3	ncd
LOC105836999	1.35747	3.7669e-14	gene_1632	1.6233	2.06995e-06	39S ribosomal protein L35%2C mitochondrial	mRpL35
LOC105840067	-1.12117	9.27089e-15	gene_2704	-1.96502	5.49436e-07	dopamine D2-like receptor%2C transcript variant X2	Dop2R
LOC105841127	-1.25892	2.01736e-07	gene_1246	-1.74465	4.62565e-07	potassium/sodium hyperpolarization-activated cyclic nucleotide-gated channel 3%2C transcript variant X5	Ih
LOC118648666	-1.2043	1.14589e-11	gene_12225	-1.8164	0.00481422	uncharacterized LOC118648666%2C transcript variant X1	Ank
LOC105832552	-1.51187	3.55657e-17	gene_1359	-1.43967	0.00370573	uncharacterized LOC105832552%2C transcript variant X2	NA
LOC105833473	1.59956	2.19096e-11	gene_10361	1.35531	1.46818e-08	uncharacterized LOC105833473	NA
LOC105834433	-2.05118	9.39099e-25	gene_12904	-1.05624	0.00102225	uncharacterized LOC105834433%2C transcript variant X1	NA
LOC105833820	-1.73876	5.1786e-23	gene_12041	-1.24526	0.00263686	carbonic anhydrase-related protein 10%2C transcript variant X2	CARPA
LOC105839891	1.58507	1.37886e-13	gene_3628	1.36515	0.00422147	phytanoyl-CoA dioxygenase%2C transcript variant X1	CG14688
LOC105833054	-1.40683	1.31462e-12	gene_13131	-1.53536	1.95333e-06	tubby-related protein 4	Tusp
LOC105829116	-1.32222	5.54954e-06	gene_9594	-1.6327	0.00163166	uncharacterized LOC105829116%2C transcript variant X2	CG32647
LOC105839182	-1.05551	8.16672e-18	gene_5118	-2.04229	2.2406e-08	leucine-rich repeat-containing protein 40%2C transcript variant X2	CG3494, f-cup
LOC105837049	-1.48735	1.34515e-18	gene_7102	-1.44684	7.19869e-06	5-hydroxytryptamine receptor 1	5-HT7
LOC105833509	-1.5647	6.41944e-16	gene_7684	-1.37161	0.00348696	protein unzipped	uzip
LOC105828668	-1.4436	1.76145e-15	gene_9874	-1.48661	0.000335702	gustatory and pheromone receptor 32a	NA
LOC105833550	-1.39352	5.25277e-15	gene_8855	-1.51992	2.11174e-05	vesicular inhibitory amino acid transporter%2C transcript variant X1	VGAT
LOC105833115	-1.20912	4.88255e-11	gene_13184	-1.73549	0.00192124	protein Cep78 homolog	NA
LOC105838154	1.2191	5.65386e-07	gene_740	1.70678	0.0329619	collagen alpha-1(III) chain	NA
LOC105835258	-1.77256	2.01962e-19	gene_14867	-1.16311	0.0447868	dual specificity protein phosphatase 15%2C transcript variant X1	CG10089
LOC105832602	-1.95436	2.22275e-10	gene_9599	-1.04762	0.00170644	uncharacterized LOC105832602	CG15478
LOC105835071	-1.25876	4.99707e-12	gene_2930	-1.62526	0.000291675	neural cell adhesion molecule 2%2C transcript variant X8	dpr19
LOC105838437	-1.65329	4.56616e-21	gene_10384	-1.22925	9.36623e-06	uncharacterized LOC105838437%2C transcript variant X3	CG44247
LOC105830176	1.54023	3.74464e-15	gene_12664	1.31774	0.00133303	adenosylhomocysteinase	Ahcy
LOC105839536	-1.87421	1.083e-21	gene_7457	-1.08254	0.000706427	uncharacterized LOC105839536%2C transcript variant X3	CG32017
LOC105829254	1.86462	2.90358e-14	gene_1874	1.08652	0.000684125	maternal protein exuperantia%2C transcript variant X3	exu
LOC105833193	-1.072	1.36851e-09	gene_7931	-1.8897	6.61226e-06	histone-lysine N-methyltransferase%2C H3 lysine-79 specific	CG13251
LOC105831681	-1.17809	9.93619e-09	gene_13013	-1.71229	0.000400604	uncharacterized LOC105831681%2C transcript variant X4	CG32809
LOC105828405	-1.21379	8.93167e-21	gene_5754	-1.65871	0.00128342	two pore potassium channel protein sup-9	Task7
LOC114255720	-1.21307	4.39958e-09	gene_12530	-1.65716	9.49659e-05	DNA N6-methyl adenine demethylase%2C transcript variant X3	Tet
LOC105830345	1.07438	1.99239e-09	gene_10692	1.86751	1.82806e-10	39S ribosomal protein L37%2C mitochondrial%2C transcript variant X1	mRpL37
LOC105831286	1.55211	1.36618e-14	gene_12724	1.2861	0.0213263	calcyphosin-like protein%2C transcript variant X3	CG10126, CG31345
LOC118644124	-1.98175	2.49296e-20	gene_4939	-1.00699	0.002782	uncharacterized LOC118644124	CG32432
LOC105831857	-1.36151	1.29953e-12	gene_1923	-1.45413	0.0012081	uncharacterized LOC105831857%2C transcript variant X1	NA
LOC105835628	-1.32892	1.21444e-17	gene_9874	-1.48661	0.000335702	uncharacterized LOC105835628%2C transcript variant X4	NA
LOC105835148	-1.12322	6.29065e-07	gene_5652	-1.75674	0.00877533	failed axon connections%2C transcript variant X1	fax
LOC105831645	-1.69458	9.90173e-25	gene_497	-1.16434	0.00216996	serine-rich adhesin for platelets%2C transcript variant X2	CG43901
LOC105827832	1.01048	0.00149755	gene_11137	1.94835	0.000165382	uncharacterized LOC105827832	NA
LOC105840418	-1.51602	9.58574e-13	gene_7512	-1.29444	0.0296609	ammonium transporter Rh type A%2C transcript variant X4	Rh50
LOC105836957	-1.02493	7.36353e-13	gene_2320	-1.91075	1.23732e-05	disks large homolog 5%2C transcript variant X8	Dlg5
LOC105831031	-1.38072	1.61616e-13	gene_5563	-1.41024	1.07364e-05	head-specific guanylate cyclase	Gycalpha99B
LOC105829201	1.18272	1.44289e-15	gene_7912	1.62318	6.224e-08	NADH dehydrogenase [ubiquinone] 1 beta subcomplex subunit 10	ND-PDSW
LOC105832913	1.03436	1.68196e-06	gene_4767	1.85142	3.44853e-05	dolichyl-diphosphooligosaccharide--protein glycosyltransferase subunit STT3A	Stt3A
LOC105838807	-1.43366	3.71198e-20	gene_13416	-1.3301	3.73065e-05	protein Fe65 homolog%2C transcript variant X1	NA
LOC105835444	-1.13633	2.34464e-09	gene_7078	-1.67686	1.67298e-07	serine/threonine-protein kinase 32A%2C transcript variant X3	CG32944
LOC105833171	-1.24837	7.14653e-11	gene_13066	-1.52359	0.0102361	sodium-coupled monocarboxylate transporter 1%2C transcript variant X2	CG6723, CG9657
LOC105838555	1.0952	1.26868e-13	gene_1782	1.73315	3.41983e-13	uncharacterized LOC105838555	NA
LOC105835109	-1.12034	7.85548e-14	gene_601	-1.69297	2.12849e-10	vacuolar protein sorting-associated protein 13A%2C transcript variant X3	NA
LOC105838482	1.19317	9.46105e-10	gene_388	1.5876	0.00304365	uncharacterized LOC105838482%2C transcript variant X1	CNMa
LOC105834114	-1.87002	6.01438e-22	gene_2029	-1.0127	0.000492485	uncharacterized LOC105834114%2C transcript variant X4	CG42795
LOC105834776	-1.27977	2.43404e-08	gene_1178	-1.47851	0.00202596	uncharacterized LOC105834776	beat-VI
LOC105835873	-1.49528	3.06706e-23	gene_5088	-1.26061	0.000431504	tyrosine decarboxylase	Tdc1
LOC105832826	1.02227	3.0609e-08	gene_10612	1.83893	4.68978e-07	iron-sulfur protein NUBPL%2C transcript variant X1	CG3262
LOC105832139	-1.81238	4.05151e-19	gene_9804	-1.03588	3.83747e-06	ankyrin repeat and death domain-containing protein 1A%2C transcript variant X1	NA
LOC105830209	-1.47441	5.74688e-22	gene_7499	-1.26641	0.00057427	protein tipE%2C transcript variant X1	Teh1
LOC105835419	1.14087	8.96163e-13	gene_1140	1.63512	1.1263e-08	39S ribosomal protein L21%2C mitochondrial	mRpL21
LOC105836603	-1.24297	1.15516e-11	gene_12423	-1.50016	2.62817e-05	membrane-anchored lipid-binding protein LAM4%2C transcript variant X2	NA
LOC105838812	-1.46025	1.04909e-09	gene_4802	-1.26242	0.000108791	hemicentin-1%2C transcript variant X2	CG45263
LOC105833416	-1.68463	1.06903e-30	gene_1915	-1.09399	2.44114e-07	brefeldin A-inhibited guanine nucleotide-exchange protein 3%2C transcript variant X1	CG5937
LOC105832675	-1.1504	7.42123e-09	gene_12109	-1.60115	0.000770705	glutathione S-transferase%2C transcript variant X10	NA
LOC105829352	-1.24288	1.13598e-16	gene_14102	-1.47839	0.00076263	cAMP-dependent protein kinase type II regulatory subunit%2C transcript variant X1	Pka-R2
LOC105832304	-1.6755	2.03234e-17	gene_8158	-1.09649	8.68481e-05	uncharacterized LOC105832304%2C transcript variant X1	CG13532, CG5597
LOC105833448	-1.66112	8.9496e-24	gene_13182	-1.10574	0.00190068	uncharacterized LOC105833448%2C transcript variant X1	NA
LOC105836505	-1.13079	2.73369e-15	gene_8715	-1.62077	0.000237716	uncharacterized LOC105836505	CG16779
LOC105829945	1.07886	1.22358e-10	gene_12888	1.69188	3.44305e-06	nuclear pore complex protein Nup93	Nup93-2, Nup93-1
LOC105839511	-1.21097	2.01294e-15	gene_954	-1.49887	8.21872e-06	inactive rhomboid protein 1%2C transcript variant X3	rho-5
LOC105834367	-1.27299	1.29752e-12	gene_14803	-1.42558	0.00664437	RNA-binding protein Nova-1%2C transcript variant X1	ps
LOC105828161	1.11718	0.0369963	gene_5726	1.62153	3.49993e-05	protein disulfide-isomerase A6 homolog	CaBP1
LOC105835209	1.77016	2.34173e-17	gene_3709	1.02328	0.0021987	iroquois-class homeodomain protein IRX-6	mirr
LOC118644182	-1.74934	2.3598e-21	gene_7923	-1.02889	0.0123851	GTP-binding protein Di-Ras2-like	CG8500
LOC105841111	-1.4268	7.93379e-21	gene_6081	-1.2607	6.91104e-05	uncharacterized LOC105841111	CG6184
LOC105840003	1.17148	1.72939e-14	gene_6416	1.52709	9.21355e-06	nuclear pore complex protein Nup54	Nup54
LOC105834079	1.08947	7.9484e-09	gene_11561	1.63014	7.38408e-05	glutamate-rich WD repeat-containing protein 1%2C transcript variant X1	l_2_09851
LOC105836226	1.12896	2.19391e-05	gene_5723	1.56886	0.0169177	O-acyltransferase like protein%2C transcript variant X2	drd
LOC105832594	1.19262	2.50876e-07	gene_10963	1.47839	0.00026687	peptidyl-prolyl cis-trans isomerase-like 1	Cypl
LOC105837629	1.25654	2.68057e-07	gene_7564	1.39469	0.00456425	neuroparsin-A	NA
LOC105830696	-1.33283	7.00771e-17	gene_7170	-1.30886	0.0156093	uncharacterized LOC105830696	Teh3
LOC105834591	1.23568	3.07359e-16	gene_14855	1.40696	0.000137961	thymosin beta%2C transcript variant X4	cib
LOC105833523	1.24325	2.84379e-08	gene_8419	1.39801	3.39382e-07	uncharacterized LOC105833523	CG42380
LOC105837460	-1.64533	3.788e-21	gene_12687	-1.05573	2.36143e-05	uncharacterized LOC105837460%2C transcript variant X1	CG42268
LOC118644036	-1.52403	2.3387e-11	gene_15186	-1.13495	0.000384981	uncharacterized LOC118644036%2C transcript variant X6	NA
LOC105835103	-1.12056	3.76157e-08	gene_14327	-1.54232	0.000116548	dynamin%2C transcript variant X7	shi
LOC105837812	1.16445	8.97683e-06	gene_1026	1.47985	3.64991e-05	transient receptor potential cation channel protein painless	pain
LOC105830670	-1.30321	7.18103e-19	gene_3754	-1.31018	8.91852e-05	uncharacterized LOC105830670	NA
LOC105831090	1.30552	1.51014e-07	gene_10164	1.30691	6.30872e-05	dipeptidyl peptidase 3%2C transcript variant X1	DppIII
LOC105829258	1.62941	7.91701e-09	gene_2020	1.04503	0.0197329	probable chitinase 2%2C transcript variant X4	Cht2
LOC105830753	-1.66669	7.53972e-12	gene_1342	-1.0151	3.13517e-06	serine/threonine-protein kinase BRSK2%2C transcript variant X2	sff
LOC105835940	1.38438	2.07649e-08	gene_10344	1.22093	0.00182764	mitochondrial intermembrane space import and assembly protein 40-A	CG7950
LOC105836335	-1.18698	6.29205e-15	gene_10464	-1.41643	1.66112e-07	prominin-like protein%2C transcript variant X6	promL
LOC105836872	-1.05582	4.15894e-15	gene_2680	-1.58938	2.61726e-06	calcium-independent protein kinase C%2C transcript variant X2	Pkc98E
LOC105834771	-1.64592	2.78333e-15	gene_6963	-1.01875	0.0139913	superoxide dismutase [Cu-Zn]%2C chloroplastic%2C transcript variant X2	Sod3
LOC105838862	-1.10175	2.45761e-19	gene_13978	-1.52176	2.10462e-06	fasciculation and elongation protein zeta-2	Unc-76
LOC105831158	-1.16548	3.0401e-18	gene_10107	-1.43353	2.64537e-06	sodium leak channel non-selective protein	na
LOC105830292	1.25894	6.37533e-13	gene_8424	1.30924	1.94157e-06	7-methylguanosine phosphate-specific 5'-nucleotidase	cN-IIIB
LOC105833427	-1.50016	4.85866e-16	gene_13080	-1.09592	0.000803501	uncharacterized LOC105833427%2C transcript variant X1	beat-IIIc, beat-IIIb, beat-IIIa
LOC105834416	1.3147	3.06706e-23	gene_7032	1.24859	5.97317e-09	protein tumorous imaginal discs%2C mitochondrial%2C transcript variant X1	CG5504
LOC118645860	-1.43438	7.22875e-20	gene_15204	-1.14415	2.75719e-05	uncharacterized LOC118645860	NA
LOC105835250	1.63303	1.21739e-12	gene_10920	1.00444	0.0301774	angiopoietin-2	CG41520
LOC105835340	-1.14965	8.61678e-15	gene_3884	-1.42635	3.52728e-05	lactosylceramide 4-alpha-galactosyltransferase%2C transcript variant X6	alpha4GT2, alpha4GT1
LOC105828314	1.38433	8.14336e-11	gene_14652	1.18225	0.0055931	actin-5C%2C transcript variant X1	Act5C
LOC105840981	1.07244	3.26929e-12	gene_10062	1.52346	2.90269e-09	dihydrolipoyllysine-residue acetyltransferase component of pyruvate dehydrogenase complex%2C mitochondrial%2C transcript variant X2	NA
LOC105838980	1.08953	0.000360883	gene_255	1.48881	0.000721846	trehalase	NA
LOC105832747	1.46256	5.13195e-18	gene_3953	1.10566	1.05249e-05	cell growth-regulating nucleolar protein	CG12909
LOC105836334	-1.15824	1.06765e-11	gene_7790	-1.39573	4.55582e-08	uncharacterized LOC105836334%2C transcript variant X6	wake
LOC105829943	1.21843	2.7617e-15	gene_2642	1.31909	5.82451e-06	uncharacterized LOC105829943	CG18259, CG6961
LOC105837991	1.07158	2.35568e-14	gene_2115	1.49863	9.80674e-10	heat shock protein 75 kDa%2C mitochondrial	Trap1
LOC105832068	1.12738	1.47122e-19	gene_13401	1.4181	2.96904e-08	nucleolar GTP-binding protein 1	Non1
LOC105834864	-1.05615	8.34706e-12	gene_2102	-1.51368	1.11501e-06	segmentation protein Runt	run
LOC105829346	1.13386	2.93793e-14	gene_13033	1.40806	0.00794545	innexin inx3%2C transcript variant X1	Inx3
LOC105829257	-1.07118	1.41582e-14	gene_9874	-1.48661	0.000335702	uncharacterized LOC105829257	NA
LOC105840034	-1.19053	3.11677e-09	gene_10365	-1.32735	2.44114e-07	uncharacterized LOC105840034%2C transcript variant X4	wge
LOC105837125	1.30683	1.5755e-11	gene_5168	1.20481	0.00708833	obscurin%2C transcript variant X6	Unc-89
LOC105834148	1.01848	3.60956e-12	gene_11868	1.54237	1.45458e-09	39S ribosomal protein L22%2C mitochondrial%2C transcript variant X1	mRpL22
LOC105838894	1.50585	1.87309e-08	gene_12745	1.04221	0.00982075	asparagine synthetase [glutamine-hydrolyzing]%2C transcript variant X2	AsnS
LOC105833926	-1.14426	2.71906e-12	gene_13638	-1.36684	2.20946e-06	suppressor of lurcher protein 1	CG34402
LOC105829290	1.09538	1.67513e-08	gene_6571	1.42582	0.00165375	nucleoporin Nup37%2C transcript variant X1	Nup37
LOC105830507	-1.27303	1.84307e-11	gene_9174	-1.22357	0.0158379	uncharacterized LOC105830507%2C transcript variant X1	s-cup
LOC105832990	-1.15186	1.84421e-12	gene_3291	-1.34226	0.000167168	polypyrimidine tract-binding protein 1%2C transcript variant X5	heph
LOC105832032	1.08028	7.53759e-08	gene_11686	1.42704	0.00109939	uncharacterized LOC105832032	NA
LOC105838543	1.25724	1.72224e-12	gene_8780	1.21877	0.0104329	SUMO-activating enzyme subunit 1	Aos1
LOC105833499	1.36805	4.38643e-13	gene_7676	1.11617	1.83818e-05	notchless protein homolog 1	Nle
LOC105840168	1.18334	4.79986e-13	gene_9823	1.29034	0.000125629	nuclear pore complex protein Nup107	Nup107
LOC105833619	1.38114	4.87074e-18	gene_11950	1.10283	1.01732e-06	uncharacterized LOC105833619	CG13203
LOC105831240	1.26784	3.19409e-08	gene_10324	1.19707	0.0030943	glutathione hydrolase 1 proenzyme	CG17636, Ggt-1
LOC105830687	-1.4478	6.52558e-19	gene_1902	-1.04769	8.69402e-05	agrin%2C transcript variant X1	NA
LOC105829563	1.04855	1.76145e-15	gene_4002	1.44557	2.7031e-10	peptidyl-tRNA hydrolase ICT1%2C mitochondrial	CG6094
LOC105840402	1.34998	8.25491e-17	gene_866	1.12108	6.80542e-05	mitochondrial import inner membrane translocase subunit Tim13-B	CG34132, Tim13
LOC105834120	1.15495	3.0434e-06	gene_1890	1.30497	4.71935e-05	uncharacterized LOC105834120%2C transcript variant X2	CG12814
LOC105839603	1.07676	1.10819e-12	gene_12049	1.39554	9.60547e-09	probable ATP-dependent RNA helicase DDX28	Dbp21E2
LOC105837531	1.4247	9.80763e-16	gene_7235	1.05001	6.4843e-07	reticulon-4-interacting protein 1%2C mitochondrial	CG17221
LOC105831993	1.18443	2.32366e-12	gene_7176	1.2622	0.000139356	leucine-rich repeat-containing protein 58	CG32687
LOC105836798	-1.38802	1.74148e-14	gene_7111	-1.06987	2.51955e-06	uncharacterized LOC105836798%2C transcript variant X4	Gfrl
LOC105828790	-1.12968	1.90953e-12	gene_13589	-1.3103	1.47929e-09	CREB-regulated transcription coactivator 1%2C transcript variant X13	Crtc
LOC105833233	1.25146	3.50989e-14	gene_14757	1.1732	0.00129355	myosin regulatory light chain sqh	sqh
LOC105833935	1.22078	4.53585e-05	gene_7407	1.19721	0.0248157	facilitated trehalose transporter Tret1	CG1208
LOC118644170	-1.09091	0.0224661	gene_11962	-1.32767	2.07441e-07	ubiquitin-60S ribosomal protein L40%2C transcript variant X1	RpL40
LOC118644224	1.19272	0.0429684	gene_698	1.20889	2.74185e-05	polyglutamine-binding protein 1-like	PQBP1
LOC105834687	1.00393	5.43081e-15	gene_9621	1.43384	0.000617863	frizzled-4%2C transcript variant X1	fz4
LOC105838044	1.21972	0.000142069	gene_1727	1.17909	0.00261818	SRA stem-loop-interacting RNA-binding protein%2C mitochondrial-like	SLIRP1, SLIRP2
LOC118648456	-1.17849	1.18425e-11	gene_3693	-1.2065	1.44695e-05	kazrin-like	Liprin-gamma
LOC105832628	1.22566	1.15537e-15	gene_459	1.15672	0.00542134	lamin Dm0%2C transcript variant X1	LamC, Lam
LOC105838316	-1.31737	0.000788656	gene_6197	-1.07235	7.71563e-05	polyprenol reductase%2C transcript variant X6	CG7840
LOC105831066	-1.13521	1.84137e-25	gene_7942	-1.24391	1.14246e-05	potassium voltage-gated channel subfamily H member 2%2C transcript variant X11	sei
LOC105831664	1.18952	2.87807e-15	gene_118	1.18519	1.41442e-09	mitochondrial inner membrane protein OXA1L	OXA1L
LOC105839514	-1.10361	3.07359e-16	gene_8042	-1.27627	1.14846e-07	visual system homeobox 2%2C transcript variant X3	Vsx1, Vsx2
LOC118644190	1.10594	7.81373e-07	gene_5415	1.25851	0.000607284	facilitated trehalose transporter Tret1-like	CG31100
LOC105834565	-1.38025	3.80075e-10	gene_478	-1.00423	0.0447414	diacylglycerol kinase 1	Dgk
LOC105837933	-1.34252	9.79857e-17	gene_8935	-1.03094	0.00262925	sodium/calcium exchanger 2%2C transcript variant X1	Calx
LOC105831353	-1.16692	8.53336e-11	gene_12595	-1.17867	0.000147723	otoferlin%2C transcript variant X2	NA
LOC105835333	-1.01443	1.46396e-10	gene_5054	-1.35492	1.94235e-07	cyclic nucleotide-gated cation channel alpha-3%2C transcript variant X7	CG42260
LOC105831327	1.10685	5.60494e-12	gene_1424	1.23787	0.00016046	glyoxylate/hydroxypyruvate reductase A	NA
LOC105839139	-1.12608	5.35511e-18	gene_669	-1.21603	4.3558e-05	MAGUK p55 subfamily member 5-A%2C transcript variant X1	sdt
LOC105836478	1.04316	0.000753123	gene_4114	1.31009	0.0168002	tetraspanin-2A	Tsp2A
LOC105832592	-1.09833	6.22367e-20	gene_910	-1.23595	1.13219e-06	cilia- and flagella-associated protein 100	NA
LOC105832639	-1.11806	7.59843e-20	gene_10553	-1.21289	2.56625e-06	G protein-coupled receptor kinase 1%2C transcript variant X1	Gprk1
LOC118648898	-1.13119	1.44462e-09	gene_1156	-1.19449	0.0326376	uncharacterized LOC118648898%2C transcript variant X4	NA
LOC105830916	-1.01186	4.28541e-09	gene_13946	-1.32473	7.91399e-09	Down syndrome cell adhesion molecule-like protein Dscam2%2C transcript variant X19	Dscam1
LOC105833705	-1.11533	3.57862e-14	gene_9736	-1.20008	2.15891e-05	uncharacterized LOC105833705%2C transcript variant X2	mtt
LOC105835517	-1.15025	4.97726e-05	gene_1527	-1.16007	2.53583e-07	rho-related BTB domain-containing protein 1%2C transcript variant X9	RhoBTB
LOC105833610	1.00558	1.28836e-11	gene_10561	1.31708	6.23526e-05	cyclin-Q%2C transcript variant X2	koko
LOC105837935	1.16115	2.46202e-12	gene_8938	1.13872	4.86236e-05	polyribonucleotide nucleotidyltransferase 1%2C mitochondrial%2C transcript variant X1	PNPase
LOC105837431	-1.21252	2.19334e-12	gene_2776	-1.08869	2.3006e-05	mucin-5AC	NA
LOC105837005	1.25876	2.93175e-11	gene_6505	1.03663	0.00868576	probable DNA replication complex GINS protein PSF2	Psf2
LOC105830866	-1.10936	9.3861e-18	gene_9677	-1.17601	0.000252465	carboxyl-terminal PDZ ligand of neuronal nitric oxide synthase protein%2C transcript variant X4	CG42673
LOC105836735	-1.03884	3.47901e-21	gene_6448	-1.25404	1.77515e-05	guanine nucleotide-releasing factor 2%2C transcript variant X10	C3G
LOC105837646	1.19601	1.34646e-18	gene_9827	1.08367	0.00256588	nucleoplasmin-like protein%2C transcript variant X2	Nlp
LOC105834952	-1.03435	2.13059e-16	gene_13035	-1.25268	0.00874964	sex-lethal homolog%2C transcript variant X7	ssx, Sxl
LOC105834871	-1.07112	2.35553e-08	gene_3959	-1.20796	3.85718e-05	MD-2-related lipid-recognition protein	Npc2g, Npc2h
LOC105830706	1.02287	1.26465e-05	gene_288	1.2608	4.88875e-05	phosphatidylserine synthase 1%2C transcript variant X1	l_3_77CDf
LOC105834241	-1.13983	4.16596e-13	gene_10342	-1.12707	4.76824e-06	protein MTSS 2%2C transcript variant X3	mim
LOC105837054	1.07994	1.06663e-06	gene_13539	1.17482	0.00454926	organic solute transporter alpha-like protein 3%2C transcript variant X1	CG6836
LOC105836902	-1.07932	6.24247e-10	gene_6060	-1.16215	5.1181e-06	kinesin-like protein KIF3B%2C transcript variant X1	Klp68D
LOC105838568	-1.16554	5.27652e-08	gene_9871	-1.06892	0.036641	platelet endothelial aggregation receptor 1%2C transcript variant X7	NimB3, NimA
LOC105828870	1.00106	1.95118e-08	gene_5703	1.23079	0.000208125	glutamine-dependent NAD(+) synthetase%2C transcript variant X1	Nadsyn
LOC105838505	1.10909	1.62186e-15	gene_6532	1.09671	1.23616e-07	lysine--tRNA ligase%2C transcript variant X2	NA
LOC105836227	1.03949	3.71654e-11	gene_10225	1.13627	1.70232e-05	OCIA domain-containing protein 1	asrij
LOC105840690	1.02299	9.9329e-08	gene_8450	1.14158	0.000644461	uncharacterized LOC105840690	CG30105
LOC105835025	1.08234	3.80808e-08	gene_5956	1.06666	0.00414193	single-strand selective monofunctional uracil DNA glycosylase%2C transcript variant X2	CG5285
LOC105828923	1.08027	7.03849e-09	gene_10154	1.05613	0.000151389	ubiquitin carboxyl-terminal hydrolase 5%2C transcript variant X1	Usp5
LOC105828540	1.03104	1.34461e-07	gene_4251	1.08615	2.50685e-06	39S ribosomal protein L2%2C mitochondrial	mRpL2
LOC105832498	-1.07082	6.45646e-24	gene_9474	-1.03826	5.69455e-06	protein RUFY3%2C transcript variant X1	CG31064
LOC105837732	1.06741	0.00259126	gene_11274	1.03227	0.0191792	circadian clock-controlled protein daywake	CG14661
LOC105829920	-1.01588	7.25437e-12	gene_2116	-1.07501	0.00720097	lysocardiolipin acyltransferase 1%2C transcript variant X1	NA
LOC105830083	1.02723	7.59254e-11	gene_8178	1.05682	4.71259e-05	A-kinase anchor protein 1%2C mitochondrial%2C transcript variant X2	spoon
LOC105833657	-1.01596	9.82391e-14	gene_11101	-1.06796	0.000112973	uncharacterized LOC105833657	CG12851
LOC105834388	-1.0644	4.38339e-23	gene_4939	-1.00699	0.002782	uncharacterized LOC105834388	CG32432
LOC105837901	-1.02828	4.62921e-15	gene_4734	-1.02673	0.000159711	cytosolic carboxypeptidase 6%2C transcript variant X1	CG31019
LOC105840587	1.00038	4.30567e-09	gene_2897	1.04839	0.000100288	SET and MYND domain-containing protein 4	Smyd4-3
LOC105838727	1.02662	0.0153509	gene_11883	1.00094	0.00144721	UDP-glucuronic acid decarboxylase 1	Uxs

## Sheet: Adult
GeneID (M.pharaonis, NCBI)	log2 Foldchange (M.pharaonis)	FDR adjusted pvalue (M.pharaonis)	GeneID (A.echinatior, in house)	log2 Foldchange (A.echinatior)	FDR adjusted pvalue (A.echinatior)	Gene name (NCBI)	Orthologs (D. melanogaster)
LOC105833997	8.53853	7.17207e-15	gene_2834	10.2376	5.25385e-44	tropomyosin-2%2C transcript variant X1	Tm2
LOC105833863	5.96891	4.17094e-11	gene_8805	9.68646	3.06484e-38	skin secretory protein xP2	NA
LOC105836204	7.69052	7.17207e-15	gene_2032	4.56855	2.75788e-26	troponin C%2C isoallergen Bla g 6.0101	TpnC41C
LOC105834903	6.09485	9.18668e-11	gene_10983	5.44494	3.06312e-26	uncharacterized LOC105834903	NA
LOC105834867	4.45386	7.21913e-11	gene_11150	7.12454	4.32594e-11	flightin%2C transcript variant X2	fln
LOC105837052	3.55224	1.89592e-05	gene_13240	6.57027	1.49864e-09	uncharacterized LOC105837052	NA
LOC105833150	4.46719	7.42099e-13	gene_8933	4.58728	2.47787e-27	collagen alpha-5(IV) chain	frm
LOC105835740	3.02782	0.000147599	gene_14141	6.23094	1.36336e-19	actin%2C muscle	Act88F, Act57B, Act87E
LOC118644202	3.63428	3.41988e-06	gene_3306	5.14561	9.39869e-12	chitin deacetylase 1-like	verm
LOC114254571	3.16521	4.99983e-10	gene_3292	5.60434	1.30887e-08	cuticle protein 18.7	NA
LOC105828852	3.34031	3.55146e-11	gene_3869	5.03512	5.2706e-26	SET and MYND domain-containing protein 4%2C transcript variant X2	NA
LOC114255695	4.72026	9.65141e-08	gene_2925	3.54458	4.66636e-07	proline-rich extensin-like protein EPR1	NA
LOC105834826	4.19655	6.95881e-07	gene_13726	3.7061	3.81529e-10	uncharacterized LOC105834826	NA
LOC105831433	1.77702	0.043546	gene_12165	8.39995	5.48781e-13	spidroin-1	NA
LOC105831991	2.88772	1.24523e-11	gene_7146	4.72621	5.4738e-30	armadillo repeat-containing protein 6 homolog	CG5721
LOC105832316	3.32697	0.0260375	gene_5989	4.08999	1.03725e-05	chymotrypsin-1	NA
LOC105830375	2.30042	0.00235864	gene_13725	5.08007	1.94726e-08	cuticle protein 64	NA
LOC105837073	1.96238	0.0182697	gene_13536	5.61694	4.88175e-08	cuticle protein 79	NA
LOC105840611	2.12744	0.0352145	gene_7445	4.84556	5.19409e-06	uncharacterized LOC105840611%2C transcript variant X4	CG13314, CG14397
LOC105838788	2.78058	4.72706e-08	gene_15044	3.53554	1.74511e-09	protein obstructor-E	obst-E
LOC105833824	2.77023	5.55574e-06	gene_10588	3.44224	7.26001e-23	uncharacterized LOC105833824	CG15617, CG42319, Zasp67
LOC105833526	2.3433	1.16789e-11	gene_8182	4.00905	5.89876e-26	protein vestigial%2C transcript variant X2	vg
LOC105838016	1.49819	0.000768038	gene_10488	5.92985	2.21081e-12	glutenin%2C low molecular weight subunit	NA
LOC105839887	2.23557	3.82006e-14	gene_3866	3.74914	2.20803e-21	uncharacterized LOC105839887%2C transcript variant X1	NA
LOC105837927	2.03819	0.00586963	gene_9055	4.09715	2.64438e-06	glycine-rich protein%2C transcript variant X3	NA
LOC105838013	1.38153	0.00711357	gene_10490	5.86734	2.67273e-14	uncharacterized LOC105838013	Cpr97Ea
LOC105832775	-1.75343	0.00335888	gene_13835	-4.56911	5.13624e-27	complexin%2C transcript variant X2	cpx
LOC105829082	-1.61784	0.0202848	gene_6797	-4.72051	2.90437e-28	1-phosphatidylinositol 4%2C5-bisphosphate phosphodiesterase epsilon-1%2C transcript variant X1	NA
LOC105838132	3.44746	1.80819e-10	gene_4469	2.0639	3.12476e-11	dihydrofolate reductase%2C transcript variant X2	Dhfr
LOC105836473	1.21024	0.0139621	gene_2900	5.84384	1.75954e-10	protein obstructor-E%2C transcript variant X3	NA
LOC105827832	2.74124	3.97515e-11	gene_11137	2.57775	1.14605e-09	uncharacterized LOC105827832	NA
LOC105836500	1.35668	0.00203821	gene_3306	5.14561	9.39869e-12	chitin deacetylase 1%2C transcript variant X1	verm
LOC105839323	-1.6153	0.000718954	gene_3981	-4.24767	3.73681e-26	gamma-aminobutyric acid receptor subunit beta%2C transcript variant X4	Rdl
LOC105829883	2.2901	0.000269226	gene_8980	2.98675	1.9017e-08	uncharacterized LOC105829883	CG31997
LOC105840917	2.1022	6.36274e-07	gene_4739	3.21268	1.85366e-07	uncharacterized LOC105840917%2C transcript variant X4	CG15506
LOC105835606	2.28238	7.65748e-05	gene_4346	2.88038	3.57322e-05	uncharacterized LOC105835606	NA
LOC118647456	2.19311	0.00133558	gene_3255	2.97564	1.6734e-12	uncharacterized LOC118647456	NA
LOC105837730	3.83123	0.000502486	gene_11238	1.67381	0.00216091	uncharacterized LOC105837730	NA
LOC105837238	1.38772	0.000164146	gene_8706	4.501	5.78509e-10	uncharacterized LOC105837238%2C transcript variant X5	NA
LOC105829385	1.06171	0.0265916	gene_12756	5.8117	4.57839e-11	uncharacterized LOC105829385	NA
LOC105836476	1.70631	0.000150267	gene_2671	3.60755	9.70044e-12	protein obstructor-E	NA
LOC105836652	-2.00382	0.00250556	gene_3885	-3.05018	0.000887772	ejaculatory bulb-specific protein 3	NA
LOC105831549	1.8583	0.000126962	gene_10487	3.26839	1.35534e-08	putative uncharacterized protein DDB_G0271606	NA
LOC105838688	1.57043	0.00817504	gene_12638	3.85254	8.90572e-09	uncharacterized LOC105838688%2C transcript variant X1	CG6055
LOC105837332	-1.41928	0.00695978	gene_2827	-4.2435	1.52688e-25	ras-specific guanine nucleotide-releasing factor 2%2C transcript variant X3	NA
LOC105829939	-1.32334	0.0411315	gene_6466	-4.54966	1.97153e-14	pollen-specific leucine-rich repeat extensin-like protein 1	NA
LOC105837717	1.37655	0.000165544	gene_3294	4.37276	2.21757e-06	cuticle protein 2%2C transcript variant X2	NA
LOC105832810	-1.91981	4.64672e-05	gene_3111	-3.12854	4.39813e-06	uncharacterized LOC105832810%2C transcript variant X2	NA
LOC105833436	-1.09055	0.0284586	gene_10286	-5.30922	5.69517e-22	diuretic hormone class 2	Dh31
LOC105832392	-1.33447	0.00112887	gene_4440	-4.31833	4.07865e-26	broad-complex core protein%2C transcript variant X21	br
LOC105831442	2.14549	0.00018757	gene_8940	2.68015	3.79056e-11	uncharacterized LOC105831442%2C transcript variant X3	CG8192
LOC114254878	-1.52931	0.0085417	gene_10317	-3.72814	1.74437e-21	uncharacterized LOC114254878	NA
LOC105835899	-1.39408	0.0104858	gene_2403	-4.08174	7.23954e-19	CUGBP Elav-like family member 4%2C transcript variant X6	bru3
LOC105836330	-1.30537	0.000587595	gene_14717	-4.33895	9.33524e-28	synaptotagmin 1%2C transcript variant X1	Syt1
LOC105836459	1.47824	0.00250556	gene_2669	3.80725	2.56379e-12	protein obstructor-E	CG43218, obst-B
LOC105835213	-1.34662	0.00133255	gene_11076	-4.13087	4.60108e-28	protein unc-79 homolog%2C transcript variant X4	unc79
LOC105837733	1.50137	0.0136144	gene_11237	3.68663	7.08703e-08	circadian clock-controlled protein daywake	NA
LOC105834528	1.06402	0.0465061	gene_1127	5.14858	3.19888e-06	endochitinase	Cht5
LOC105832290	2.28859	6.91582e-07	gene_1321	2.38026	2.94618e-16	uncharacterized LOC105832290	CG13458
LOC105834813	-1.39822	0.0161052	gene_11625	-3.8906	4.57612e-29	regulating synaptic membrane exocytosis protein 2%2C transcript variant X1	Rim
LOC105831488	-1.83846	0.0156635	gene_10942	-2.90202	4.09749e-07	general odorant-binding protein 72	NA
LOC105837144	1.66887	0.00198186	gene_12019	3.19218	2.93878e-15	hexokinase-1	NA
LOC105828900	2.0537	0.000649965	gene_14770	2.56528	0.000211893	clavesin-2%2C transcript variant X1	Cralbp
LOC118648799	-1.37835	0.00952341	gene_3168	-3.82193	1.74846e-25	probable G-protein coupled receptor CG31760%2C transcript variant X3	CG31760
LOC105828349	-1.35412	6.00106e-07	gene_6786	-3.86479	3.14312e-21	uncharacterized LOC105828349%2C transcript variant X4	jus
LOC105834028	1.81191	2.42448e-07	gene_3741	2.83932	4.3116e-16	tubulin polyglutamylase TTLL4%2C transcript variant X2	TTLL4B, TTLL4A
LOC105838815	1.89568	9.73061e-06	gene_7175	2.71118	1.52252e-08	transcription factor SPT20 homolog%2C transcript variant X3	mtg
LOC105832126	-1.11473	0.0191739	gene_9115	-4.60521	2.84813e-23	proline-rich protein 36%2C transcript variant X3	CG42726, scrt
LOC105836054	-1.22598	0.0014096	gene_11960	-4.13869	1.07499e-26	excitatory amino acid transporter%2C transcript variant X1	Eaat2
LOC118644053	-1.26889	0.00550759	gene_3676	-3.98494	2.10638e-17	ITG-like peptide%2C transcript variant X1	spab
LOC105838922	1.62993	0.00021591	gene_3735	3.01235	3.12408e-11	cysteine dioxygenase type 1	CG5493
LOC105839793	-1.31362	0.0210904	gene_4866	-3.71022	1.0136e-17	ELAV-like protein 3%2C transcript variant X15	elav, fne, Rbp9
LOC105828792	-1.46671	0.00165792	gene_13772	-3.31381	5.06336e-05	general odorant-binding protein 69a	NA
LOC105840713	2.29934	0.000109147	gene_10550	2.08978	0.000214628	uncharacterized LOC105840713	Kaz1-ORFB
LOC105832669	-1.22065	0.00431594	gene_4031	-3.93099	1.52688e-25	uncharacterized LOC105832669	NA
LOC105831134	-1.31863	0.0045042	gene_12698	-3.61532	3.318e-20	glutamate-gated chloride channel%2C transcript variant X3	GluClalpha
LOC105828343	1.42559	0.000983325	gene_13340	3.343	5.33914e-13	GTP cyclohydrolase 1	Pu
LOC105830034	-1.14528	0.0104764	gene_12960	-4.14833	1.82916e-23	muscarinic acetylcholine receptor DM1%2C transcript variant X2	mAChR-A
LOC105835220	-1.18187	0.00901164	gene_7144	-4.01645	2.59734e-23	neuronal acetylcholine receptor subunit alpha-7%2C transcript variant X2	nAChRalpha6
LOC105837944	-1.46465	0.00387465	gene_1391	-3.23206	2.47245e-17	uncharacterized LOC105837944%2C transcript variant X6	NA
LOC105833653	1.16908	0.000364293	gene_7505	4.0312	1.88417e-07	prostaglandin E2 receptor EP2 subtype%2C transcript variant X1	CG7497
LOC105837606	3.59388	5.85908e-09	gene_6938	1.29654	0.00308109	uncharacterized LOC105837606	NA
LOC105831417	-2.04801	0.000423303	gene_7436	-2.2697	0.0015472	general odorant-binding protein 19a%2C transcript variant X1	Obp19a, lush
LOC105838651	-1.32614	0.000955268	gene_9961	-3.44734	1.49897e-21	glutamate decarboxylase%2C transcript variant X1	Gad1
LOC118646761	-1.09686	0.00417457	gene_5055	-4.1665	3.5133e-27	uncharacterized LOC118646761	NA
LOC105839189	1.8772	0.000428865	gene_5113	2.42724	2.74828e-09	proline-rich extensin-like protein EPR1%2C transcript variant X1	CG8927
LOC105828951	1.30423	0.00280589	gene_10924	3.48666	2.46215e-09	cuticle protein 67-like	NA
LOC105832621	2.63319	4.20192e-08	gene_6218	1.71625	1.75151e-05	uncharacterized LOC105832621	NimC1, slow
LOC105839692	-1.35577	0.0148335	gene_9360	-3.30717	3.63683e-08	cytochrome P450 4C1	NA
LOC105841145	-1.10626	0.0313256	gene_1398	-4.04867	5.8738e-14	trichohyalin	NA
LOC105834122	-1.17461	0.022878	gene_5046	-3.80268	7.51393e-24	homeobox protein prospero%2C transcript variant X2	pros
LOC105831780	-1.35721	0.0203118	gene_9908	-3.27403	5.49299e-26	BAI1-associated protein 3%2C transcript variant X3	unc-13-4A
LOC105830311	3.10271	1.24523e-11	gene_9075	1.42794	1.36075e-09	waprin-Phi1%2C transcript variant X1	NA
LOC105830374	1.81893	2.58187e-05	gene_13894	2.42434	0.00295349	pupal cuticle protein C1B	NA
LOC105836368	-1.07329	0.00018757	gene_5729	-4.05683	1.94273e-23	uncharacterized LOC105836368%2C transcript variant X3	CG9919
LOC105834475	1.48422	0.00829656	gene_2622	2.92435	7.61478e-05	uncharacterized LOC105834475	NA
LOC105837979	-1.11203	0.0461884	gene_4847	-3.89316	5.29639e-19	uncharacterized LOC105837979	igl
LOC105835511	-1.68794	0.00337617	gene_12265	-2.5633	2.27714e-19	glutamate-gated chloride channel%2C transcript variant X7	pHCl-1
LOC114255378	1.15563	0.00579039	gene_8407	3.73559	3.01098e-10	uncharacterized LOC114255378	rtv
LOC105828083	-1.30158	0.00240405	gene_9360	-3.30717	3.63683e-08	cytochrome P450 4C1-like	NA
LOC118648275	-1.12471	0.00325573	gene_3168	-3.82193	1.74846e-25	probable G-protein coupled receptor CG31760%2C transcript variant X3	CG31760
LOC105829627	1.97917	0.000445556	gene_3701	2.16802	5.80632e-07	uncharacterized LOC105829627	obst-G, Muc68E, obst-F
LOC105837420	-1.32411	0.00216137	gene_1194	-3.23398	3.14312e-21	inositol polyphosphate-5-phosphatase A%2C transcript variant X17	5PtaseI
LOC118648341	-1.27088	0.000498858	gene_2474	-3.36816	2.54651e-20	calcium/calmodulin-dependent 3'%2C5'-cyclic nucleotide phosphodiesterase 1-like	Pde1c
LOC118644122	2.28533	6.90931e-09	gene_11630	1.86377	2.18816e-10	tripeptidyl-peptidase 2-like	TppII
LOC118647768	-1.0228	0.000665937	gene_8737	-4.13658	5.20758e-25	uncharacterized LOC118647768	CG30053
LOC105838725	2.24951	7.72851e-10	gene_11630	1.86377	2.18816e-10	tripeptidyl-peptidase 2	TppII
LOC105832020	-1.28767	0.0255921	gene_14176	-3.22516	2.73274e-21	diacylglycerol kinase theta%2C transcript variant X10	CG31140
LOC105831878	-1.03163	0.0375537	gene_8610	-4.02175	9.55808e-24	adenylyl cyclase 78C%2C transcript variant X1	Ac78C
LOC114254709	-1.23154	0.000164146	gene_2474	-3.36816	2.54651e-20	L-type lectin-domain containing receptor kinase S.7-like%2C transcript variant X29	Pde1c
LOC105836926	-1.14112	0.0200648	gene_9988	-3.62545	9.53584e-23	basement membrane-specific heparan sulfate proteoglycan core protein%2C transcript variant X3	dpr7
LOC105832128	-1.23408	0.0129328	gene_10747	-3.3518	9.79793e-19	acid sphingomyelinase-like phosphodiesterase 3b	CG32052
LOC105834578	-1.07576	0.0272803	gene_3168	-3.82193	1.74846e-25	probable G-protein coupled receptor CG31760%2C transcript variant X11	CG31760
LOC105829207	1.49116	0.000425628	gene_3305	2.71704	8.73202e-09	chitin deacetylase 1%2C transcript variant X2	serp
LOC105837836	-1.37581	0.000622298	gene_1003	-2.93002	1.15575e-19	potassium voltage-gated channel protein Shab%2C transcript variant X3	Shab
LOC105832032	1.1884	0.00172611	gene_11686	3.38148	4.25208e-13	uncharacterized LOC105832032	NA
LOC118648646	-1.19097	0.00559307	gene_2474	-3.36816	2.54651e-20	calcium/calmodulin-dependent 3'%2C5'-cyclic nucleotide phosphodiesterase 1-like	Pde1c
LOC105836930	1.17699	0.00676256	gene_13092	3.39226	1.87758e-11	protein yellow	NA
LOC105839137	-1.22792	0.00111142	gene_494	-3.24749	1.64046e-16	voltage-gated potassium channel subunit beta-2%2C transcript variant X2	Hk
LOC105839934	-1.10377	3.21079e-05	gene_3987	-3.60398	7.08657e-26	JNK-interacting protein 1%2C transcript variant X3	Aplip1
LOC105835774	-1.50988	1.25774e-07	gene_7201	-2.63127	3.32415e-13	serine/threonine-protein kinase par-1%2C transcript variant X3	CG17698
LOC105831060	-1.71268	0.00409045	gene_7435	-2.29549	0.00244736	uncharacterized LOC105831060	Obp19a, lush
LOC105832617	-1.25765	0.00939541	gene_6617	-3.11143	6.89742e-20	G-protein coupled receptor 52%2C transcript variant X3	DopEcR
LOC105833028	-1.33129	0.00279396	gene_1275	-2.93729	2.092e-21	uncharacterized LOC105833028	CG8369
LOC105835250	1.44864	0.00289879	gene_10920	2.68406	8.38163e-11	angiopoietin-2	CG41520
LOC105839073	-1.16173	0.00308519	gene_5691	-3.34061	2.36265e-19	uncharacterized protein DDB_G0271670	NA
LOC105829370	-1.08181	0.0236621	gene_11638	-3.58332	8.19689e-20	uncharacterized LOC105829370	jeb
LOC105839503	1.28224	0.000496119	gene_7134	3.00692	8.90597e-15	SET domain-containing protein SmydA-8	SmydA-5
LOC105828482	1.31207	0.00127871	gene_12899	2.93078	1.70573e-09	uncharacterized LOC105828482%2C transcript variant X5	exp
LOC105832565	-1.64418	0.00127695	gene_13826	-2.33221	3.87061e-17	dopamine receptor 2%2C transcript variant X12	Dop1R2
LOC105834520	-1.37675	0.00117641	gene_1579	-2.70876	9.72167e-20	nucleolysin TIAR%2C transcript variant X7	trv, CG34354
LOC105835806	-1.03644	0.00829656	gene_7990	-3.5893	5.03534e-23	disintegrin and metalloproteinase domain-containing protein 11%2C transcript variant X15	mmd
LOC105836540	-1.34409	0.00989643	gene_533	-2.76253	2.20275e-19	synaptotagmin-7%2C transcript variant X2	Syt7
LOC105840124	-1.06304	0.00549478	gene_944	-3.484	3.10432e-21	protein nervous wreck%2C transcript variant X2	nwk
LOC105835641	-1.13738	0.00624555	gene_1832	-3.25064	2.31788e-24	acetylcholine receptor subunit alpha-like%2C transcript variant X2	nAChRalpha4
LOC105830858	-1.02763	0.0174593	gene_5993	-3.57855	7.65396e-23	kinesin-like protein unc-104%2C transcript variant X8	unc-104
LOC105831027	-1.05272	0.00972068	gene_4991	-3.47429	9.14177e-20	synaptotagmin-10%2C transcript variant X2	NA
LOC105832970	-1.30246	0.00469864	gene_8248	-2.79224	5.3583e-20	centrosomal protein of 164 kDa%2C transcript variant X1	CG9170
LOC105835067	1.47945	2.9763e-05	gene_9180	2.44946	4.94969e-05	chitooligosaccharidolytic beta-N-acetylglucosaminidase%2C transcript variant X1	Hexo1
LOC105834715	-1.00907	0.00725723	gene_9394	-3.57187	6.57818e-23	uncharacterized LOC105834715%2C transcript variant X2	Fie
LOC105834909	-1.40026	0.0109445	gene_12830	-2.56974	3.4673e-19	calcium-dependent secretion activator%2C transcript variant X2	Cadps
LOC105836186	-1.34149	5.8562e-05	gene_7100	-2.67995	1.16998e-19	uncharacterized LOC105836186	NA
LOC105836202	-1.49023	0.000255072	gene_2035	-2.41153	5.24379e-19	sodium- and chloride-dependent GABA transporter 1%2C transcript variant X2	NA
LOC105832968	-1.07208	0.0414936	gene_1117	-3.30003	2.39189e-25	dipeptidyl aminopeptidase-like protein 6%2C transcript variant X2	CG11319
LOC105836432	-1.00923	0.0171104	gene_10334	-3.49782	2.05173e-19	neuroendocrine convertase 2	amon
LOC105838773	-1.34428	0.00674168	gene_15045	-2.6181	3.00289e-17	cationic amino acid transporter 2%2C transcript variant X2	CG12531
LOC105839468	-1.19441	0.0115818	gene_7266	-2.92484	1.01124e-15	ELKS/Rab6-interacting/CAST family member 1%2C transcript variant X7	brp
LOC105836990	-1.05874	0.00135948	gene_7459	-3.29099	2.72826e-15	protein quiver%2C transcript variant X2	qvr
LOC105834529	1.124	0.00171507	gene_5713	3.06183	1.87814e-22	uncharacterized LOC105834529%2C transcript variant X13	CG33143
LOC105839158	-1.05305	0.00722919	gene_13606	-3.26682	3.95506e-18	synaptotagmin-4	Syt4
LOC105839074	-1.33109	7.65748e-05	gene_5690	-2.56655	1.68621e-25	sodium channel protein para%2C transcript variant X7	para
LOC105834595	-1.00208	0.0316861	gene_15029	-3.40146	1.70007e-23	major facilitator superfamily domain-containing protein 6%2C transcript variant X3	jef
LOC105834854	-1.24538	0.00880911	gene_8477	-2.73205	6.72414e-12	proton channel OtopLc%2C transcript variant X8	OtopLa
LOC105829178	-1.16598	0.00263907	gene_653	-2.88444	7.91861e-10	IDLSRF-like peptide%2C transcript variant X1	CG31221
LOC105838987	1.43939	0.00328231	gene_256	2.32348	8.92587e-11	mucin-19	NA
LOC105837787	-1.48511	0.00420874	gene_9639	-2.24983	2.36448e-08	protein madd-4%2C transcript variant X1	nolo
LOC105835786	-1.05296	1.38087e-05	gene_7198	-3.13473	2.60318e-12	4-nitrophenylphosphatase%2C transcript variant X1	CG10352, CG2680, CG15739
LOC105834274	-1.0339	0.0125098	gene_691	-3.17892	5.00686e-20	proteoglycan 4%2C transcript variant X15	CG17816
LOC118644029	-1.03772	0.000878379	gene_8958	-3.15917	2.72826e-15	vesicular acetylcholine transporter	VAChT
LOC105831494	1.49607	1.22601e-05	gene_607	2.18883	2.18176e-18	pyruvate dehydrogenase protein X component%2C mitochondrial	NA
LOC105836996	-1.15562	0.00202902	gene_1633	-2.83236	1.73441e-15	lymphocyte antigen 6D	CG8861
LOC105830464	-1.18072	0.000133888	gene_3956	-2.76847	9.87512e-21	multiple coagulation factor deficiency protein 2 homolog%2C transcript variant X2	CG12817
LOC105832394	-1.36416	0.00511432	gene_4441	-2.38675	3.67378e-13	neo-calmodulin%2C transcript variant X6	azot
LOC105834429	-1.06128	0.00175648	gene_7434	-3.04647	3.13277e-20	photoreceptor-specific nuclear receptor%2C transcript variant X2	Hr51
LOC105837347	1.81177	2.1756e-06	gene_11475	1.77943	1.73142e-06	elongation of very long chain fatty acids protein AAEL008004%2C transcript variant X2	ELOVL
LOC105838369	-1.07366	0.000149175	gene_3872	-3.00077	1.68621e-25	alpha-tubulin N-acetyltransferase	Tat, CG17003
LOC105836201	-1.2448	1.48449e-07	gene_2034	-2.58282	1.62737e-16	leucine-rich repeat-containing protein 15%2C transcript variant X5	CG14762
LOC105837847	-1.35536	0.000640915	gene_10141	-2.36867	3.11726e-15	uncharacterized LOC105837847%2C transcript variant X1	NA
LOC105835414	-1.09892	0.000101384	gene_1487	-2.9212	2.09486e-22	MAP kinase-activating death domain protein	Rab3-GEF
LOC105829381	-1.19799	0.00292946	gene_8960	-2.67716	8.16388e-17	high-affinity choline transporter 1	ChT
LOC105838661	1.16361	0.00347015	gene_11390	2.74859	1.91444e-14	dual specificity tyrosine-phosphorylation-regulated kinase 4	Dyrk2
LOC105830662	-1.03143	0.00617702	gene_14868	-3.09465	8.26004e-23	gamma-aminobutyric acid type B receptor subunit 2	GABA-B-R2
LOC105837286	2.90798	3.23107e-06	gene_9906	1.09487	0.000168603	C-type lectin 37Db%2C transcript variant X7	tfc
LOC105840775	1.26863	0.00010885	gene_4457	2.50119	1.41866e-07	uncharacterized LOC105840775	NA
LOC105833238	1.48906	1.31234e-07	gene_8494	2.12818	5.61287e-07	neutral ceramidase%2C transcript variant X3	CDase
LOC105839497	-1.0152	0.0142087	gene_165	-3.07539	1.77149e-12	acetylcholinesterase%2C transcript variant X2	NA
LOC118646161	1.22035	0.00846017	gene_9519	2.55253	2.41205e-07	farnesyl pyrophosphate synthase-like	Fpps
LOC105838187	-1.36339	0.00345768	gene_4167	-2.27614	3.2122e-17	voltage-dependent calcium channel subunit alpha-2/delta-4%2C transcript variant X1	CG4587
LOC105829103	-1.2114	0.00168194	gene_10682	-2.55396	1.23716e-15	longitudinals lacking protein%2C isoforms H/M/V%2C transcript variant X2	NA
LOC105837175	-1.39524	0.026875	gene_9229	-2.21488	1.22431e-23	retinal guanylyl cyclase 2%2C transcript variant X13	CG34357
LOC105839996	1.24728	2.72902e-05	gene_6413	2.46987	5.87085e-11	dual oxidase maturation factor 1%2C transcript variant X2	mol
LOC105836072	1.83301	0.000737829	gene_10740	1.66549	1.62153e-05	golgin subfamily A member 6-like protein 22%2C transcript variant X2	NA
LOC105835642	-1.07736	0.000597128	gene_14282	-2.81554	7.87115e-20	putative thiamine transporter SLC35F3%2C transcript variant X6	CG42322
LOC105839400	1.22233	0.000899736	gene_1388	2.45715	3.99678e-15	uncharacterized LOC105839400	qsm
LOC105837765	-1.16681	0.00265786	gene_309	-2.55415	1.16998e-19	hepatocyte nuclear factor 6%2C transcript variant X1	onecut
LOC105834433	-1.36788	2.74162e-06	gene_12904	-2.176	2.22189e-18	uncharacterized LOC105834433%2C transcript variant X1	NA
LOC105832602	-1.09683	0.012564	gene_9599	-2.70107	3.4646e-17	uncharacterized LOC105832602	CG15478
LOC105835715	1.78778	0.000348231	gene_12173	1.65118	2.96214e-09	interaptin%2C transcript variant X1	CG4213
LOC105836789	1.5634	1.39051e-06	gene_5407	1.88569	4.65768e-23	cytochrome c-type heme lyase%2C transcript variant X3	Cchl
LOC105839222	1.11158	0.000157972	gene_15056	2.64129	4.97579e-21	ATPase family AAA domain-containing protein 3A homolog	bor
LOC105838939	-1.25137	0.0299947	gene_3982	-2.3309	4.71079e-13	glutamate receptor 1%2C transcript variant X1	GluRIA, GluRIB
LOC105837690	-1.12458	0.00382205	gene_9034	-2.58334	6.40145e-18	high affinity choline transporter 1	NA
LOC105832558	1.75869	1.04754e-07	gene_667	1.63317	1.35313e-06	tubulin-specific chaperone cofactor E-like protein	mlt
LOC105832863	-1.01276	0.000670832	gene_10811	-2.83121	6.38101e-14	uncharacterized LOC105832863	NA
LOC105838437	-1.11227	0.000110787	gene_10384	-2.54949	2.13485e-20	uncharacterized LOC105838437%2C transcript variant X3	CG44247
LOC105828250	1.15236	0.000406922	gene_13907	2.44763	3.74162e-09	ATP-binding cassette sub-family G member 8	CG31121
LOC105830884	1.31148	0.00244424	gene_12519	2.14536	6.44623e-10	putative metabolite transport protein HI_1104%2C transcript variant X2	CG14439
LOC105838942	1.40245	0.00248331	gene_3986	2.00261	6.52867e-08	tyrosine 3-monooxygenase%2C transcript variant X1	ple
LOC105833259	-1.46281	0.000138405	gene_3907	-1.91745	1.14048e-13	calmodulin-binding transcription activator 1%2C transcript variant X5	Camta
LOC105833704	-1.36481	4.77379e-06	gene_9732	-2.05061	6.48241e-12	protein couch potato%2C transcript variant X1	cpo
LOC105833523	1.618	4.50109e-05	gene_8419	1.72496	7.26356e-11	uncharacterized LOC105833523	CG42380
LOC105833362	-1.27761	0.000237645	gene_6583	-2.18194	7.04916e-19	protein kinase C%2C brain isozyme%2C transcript variant X1	inaC, Pkc53E
LOC105828820	-1.07147	0.000338946	gene_14752	-2.58765	8.37043e-15	uncharacterized LOC105828820%2C transcript variant X1	NA
LOC105831539	-1.0089	0.00823098	gene_10699	-2.74647	3.23156e-23	dachshund homolog 2%2C transcript variant X8	dac
LOC105835264	1.36501	0.00198202	gene_1339	2.02866	0.00310306	uncharacterized LOC105835264	NA
LOC105830998	-1.156	0.000737671	gene_15170	-2.38789	2.65829e-12	uncharacterized LOC105830998%2C transcript variant X2	CG31191
LOC118646725	1.54915	0.033771	gene_5138	1.78062	1.10754e-08	isopentenyl-diphosphate Delta-isomerase 1-like	Idi
LOC105835963	2.05499	4.51356e-09	gene_1947	1.34056	2.09566e-06	protein inscuteable homolog	insc
LOC105838296	-1.15117	0.00523344	gene_2780	-2.38551	1.73663e-15	GTP-binding protein Di-Ras2%2C transcript variant X7	CG30158
LOC105836351	1.27774	9.50448e-05	gene_12564	2.14469	5.66085e-12	putative inorganic phosphate cotransporter%2C transcript variant X2	MFS3
LOC118644666	-1.42418	0.000608442	gene_6152	-1.91837	5.01082e-05	peroxynitrite isomerase THAP4-like	NA
LOC105837552	1.88262	6.68479e-07	gene_10787	1.45076	3.36763e-07	ribonuclease H%2C transcript variant X1	NA
LOC105839918	-1.10521	0.0229353	gene_10352	-2.47051	6.0217e-19	synaptosomal-associated protein 25%2C transcript variant X2	Snap24, Snap25
LOC105831215	1.59884	0.00117385	gene_11362	1.70736	2.83995e-07	endoglucanase E-4%2C transcript variant X2	NA
LOC105836144	1.12147	1.23264e-07	gene_6181	2.4138	7.7864e-18	T-complex protein 11-like protein 1%2C transcript variant X2	CG16721
LOC105832504	-1.37668	1.94231e-05	gene_12184	-1.96578	1.85338e-13	serine/threonine-protein phosphatase 2B catalytic subunit 2%2C transcript variant X7	CanA1, CanA-14F, Pp2B-14D
LOC118644193	1.50233	0.00132439	gene_13555	1.79805	4.10308e-13	gem-associated protein 2-like%2C transcript variant X2	Gem2
LOC105834335	-1.00988	0.00416825	gene_9506	-2.67378	1.18217e-19	uncharacterized LOC105834335%2C transcript variant X1	CG12502
LOC105838041	1.65427	0.000116239	gene_1728	1.62732	3.74021e-15	methyltransferase-like protein 23	CG5013
LOC105834830	-1.32897	0.0066827	gene_7440	-2.01918	4.69854e-15	potassium voltage-gated channel protein Shal%2C transcript variant X12	Shal
LOC105829329	-1.06758	5.33508e-05	gene_9207	-2.49865	4.574e-10	phenoloxidase-activating factor 2-like	CG13318
LOC105840002	-1.01055	0.00829656	gene_6417	-2.62872	7.44795e-19	gamma-aminobutyric acid type B receptor subunit 1%2C transcript variant X6	GABA-B-R1
LOC105831764	-1.90651	6.40372e-05	gene_13625	-1.386	0.000529302	mitochondrial substrate carrier family protein U	NA
LOC105833943	-1.03702	0.00422949	gene_141	-2.5388	8.68495e-17	whirlin%2C transcript variant X4	dysc
LOC105830989	-1.05176	0.00444224	gene_14619	-2.48867	4.50563e-16	vesicular glutamate transporter 1	VGlut
LOC105836314	1.4261	0.000124288	gene_13482	1.82519	1.41669e-06	zeta-sarcoglycan%2C transcript variant X3	Scgdelta
LOC105839257	1.34581	0.0164936	gene_9782	1.91301	0.00456402	uncharacterized LOC105839257	NA
LOC105836800	-1.13097	0.0100769	gene_13143	-2.26775	2.37255e-15	max dimerization protein 1%2C transcript variant X6	NA
LOC105830427	-1.08582	0.00262991	gene_10316	-2.35742	1.60899e-13	receptor-type guanylate cyclase daf-11%2C transcript variant X6	NA
LOC105831072	-1.33021	0.00201861	gene_9331	-1.91487	3.30631e-13	acetylcholinesterase%2C transcript variant X10	Ace
LOC105838916	1.31513	0.00128405	gene_6273	1.93648	6.06597e-07	uncharacterized LOC105838916	CG31344
LOC105839885	1.03507	1.40649e-06	gene_1926	2.45276	1.55947e-14	cyclin-dependent kinase 8%2C transcript variant X1	NA
LOC105839142	-1.08606	0.0157077	gene_6641	-2.33754	1.57603e-11	BTB/POZ domain-containing protein KCTD16	Ktl
LOC105840091	1.18532	0.000423303	gene_7707	2.13443	3.86553e-07	synaptic vesicle glycoprotein 2B%2C transcript variant X1	NA
LOC105834327	1.5777	1.88563e-06	gene_11552	1.58712	4.33004e-09	cytochrome c1%2C heme protein%2C mitochondrial%2C transcript variant X2	Cyt-c1, Cyt-c1L
LOC105834600	-1.02274	0.000193215	gene_14859	-2.44391	4.79563e-19	uncharacterized LOC105834600	NA
LOC105834996	-1.11518	0.0171518	gene_8772	-2.239	1.67485e-11	synapse-associated protein of 47 kDa%2C transcript variant X1	Sap47
LOC105836849	1.48462	4.87054e-06	gene_9276	1.66426	1.17312e-19	divergent protein kinase domain 1C	CG12038
LOC105838102	-1.02231	0.00807464	gene_1670	-2.41043	7.67496e-13	LIM domain only protein 3%2C transcript variant X1	Bx
LOC105829095	-1.12555	0.0114247	gene_13722	-2.17698	9.42159e-12	cubilin%2C transcript variant X1	CG34370
LOC118644084	1.40506	0.00764227	gene_4174	1.72791	1.253e-18	xyloside xylosyltransferase 1-like	Xxylt
LOC105838502	-1.03111	0.000656168	gene_6113	-2.32955	1.3027e-17	protein retinal degeneration B%2C transcript variant X4	rdgB
LOC105833893	-1.1906	0.00308276	gene_12065	-2.01142	1.19091e-12	calcium/calmodulin-dependent protein kinase type II alpha chain%2C transcript variant X20	CaMKII
LOC105834868	-1.10291	0.00893023	gene_3958	-2.16464	6.12937e-16	neuroglobin	NA
LOC105830697	-1.4261	0.00338574	gene_7500	-1.67157	4.9092e-08	protein tipE%2C transcript variant X1	tipE
LOC118644115	1.24595	0.000193215	gene_3697	1.89688	1.50389e-14	inosine triphosphate pyrophosphatase-like%2C transcript variant X3	CG8891
LOC105837723	-1.22942	2.65663e-05	gene_6620	-1.92031	5.46045e-17	potassium channel subfamily T member 1%2C transcript variant X3	SLO2
LOC105837950	-1.04771	0.0222614	gene_2872	-2.24038	6.15295e-14	regulator of G-protein signaling 9%2C transcript variant X8	CG42450
LOC105835345	-1.16498	0.000669321	gene_3077	-1.98471	3.54699e-10	sodium/potassium-transporting ATPase subunit alpha%2C transcript variant X2	Atpalpha
LOC105834522	-1.01705	0.018831	gene_1235	-2.25922	1.53209e-14	Kv channel-interacting protein 4	CG44422
LOC105831069	-1.04821	0.00487909	gene_15463	-2.18332	2.60414e-15	cubilin%2C transcript variant X1	CG42613
LOC105829254	1.2514	0.000539155	gene_1874	1.81548	5.25601e-08	maternal protein exuperantia%2C transcript variant X3	exu
LOC105832304	-1.07502	0.0039876	gene_8158	-2.08937	1.0136e-17	uncharacterized LOC105832304%2C transcript variant X1	CG13532, CG5597
LOC105835500	1.4427	0.00553728	gene_13209	1.5565	2.13081e-08	unconventional myosin-XVIIIa%2C transcript variant X4	Mhcl
LOC105840402	1.24163	2.42448e-07	gene_866	1.78935	7.57568e-17	mitochondrial import inner membrane translocase subunit Tim13-B	CG34132, Tim13
LOC105838359	-1.12799	0.0408779	gene_10240	-1.96522	4.04192e-12	potassium voltage-gated channel protein Shaker%2C transcript variant X7	Sh
LOC105830170	1.58911	2.62626e-07	gene_12667	1.39082	1.91952e-07	katanin p80 WD40 repeat-containing subunit B1	kat80
LOC105833207	-1.48272	0.000173023	gene_14041	-1.48057	2.29411e-11	pikachurin	SP2353
LOC105828325	1.02725	5.36256e-06	gene_13279	2.1368	1.35093e-19	rRNA 2'-O-methyltransferase fibrillarin	CG10909
LOC105840118	-1.12142	0.000395199	gene_4025	-1.95234	4.52084e-13	uncharacterized LOC105840118%2C transcript variant X5	NA
LOC105834565	-1.08649	0.00817204	gene_478	-2.00328	1.41247e-12	diacylglycerol kinase 1	Dgk
LOC105836306	1.22476	0.00899545	gene_9834	1.74555	1.67252e-07	probable cytochrome P450 305a1	Cyp305a1
LOC118644109	-1.095	0.000810936	gene_9787	-1.93595	3.03946e-07	nuclear receptor coactivator 5-like%2C transcript variant X1	NA
LOC105840722	2.05361	0.0131621	gene_11384	1.02735	1.13745e-11	GMP reductase 1	NA
LOC105837301	1.03928	0.000389477	gene_4756	2.01528	1.348e-17	uncharacterized LOC105837301%2C transcript variant X1	mRpS11
LOC105834581	-1.09854	1.28567e-05	gene_13815	-1.89781	2.26211e-08	tubulin polymerization-promoting protein homolog%2C transcript variant X16	NA
LOC105831353	-1.07856	0.000118034	gene_12595	-1.91687	6.41441e-19	otoferlin%2C transcript variant X2	NA
LOC105832139	-1.16018	0.000811257	gene_9804	-1.77788	1.31154e-13	ankyrin repeat and death domain-containing protein 1A%2C transcript variant X1	NA
LOC105835872	1.08953	3.23107e-06	gene_15468	1.82256	9.05934e-12	pyrroline-5-carboxylate reductase 1%2C mitochondrial%2C transcript variant X1	P5cr
LOC105834874	-1.06837	2.58187e-05	gene_3145	-1.85028	4.67491e-14	voltage-dependent calcium channel subunit alpha-2/delta-3%2C transcript variant X1	stj
LOC105834832	1.00307	9.74188e-05	gene_13729	1.97059	0.0010585	uncharacterized LOC105834832	CG4998
LOC105838555	1.01398	5.83948e-07	gene_1782	1.9117	6.82167e-24	uncharacterized LOC105838555	NA
LOC105836344	-1.01596	0.011205	gene_12562	-1.907	2.05836e-16	apical junction component 1 homolog%2C transcript variant X2	CG42748
LOC105833181	-1.69407	0.00872611	gene_13480	-1.13946	1.79658e-06	high affinity cAMP-specific and IBMX-insensitive 3'%2C5'-cyclic phosphodiesterase 8%2C transcript variant X2	Pde8
LOC105836219	-1.07187	0.0084338	gene_12121	-1.80035	1.03929e-11	protein turtle%2C transcript variant X7	tutl
LOC105830507	-1.28876	1.20466e-06	gene_9174	-1.48137	5.11015e-12	uncharacterized LOC105830507%2C transcript variant X1	s-cup
LOC105829903	-1.0992	0.00415473	gene_9706	-1.73062	3.41414e-11	2-phosphoxylose phosphatase 1	CG15385
LOC105832023	-1.12022	0.00169881	gene_9118	-1.69331	1.09431e-15	Kv channel-interacting protein 1	CG5890
LOC105831759	-1.06998	2.15216e-06	gene_4148	-1.77267	6.49072e-10	putative fatty acyl-CoA reductase CG5065	CG4770
LOC105832799	1.13129	0.0303394	gene_11008	1.6646	0.0159669	glycine-rich cell wall structural protein	NA
LOC105838044	1.40428	0.000402227	gene_1727	1.33903	1.08119e-09	SRA stem-loop-interacting RNA-binding protein%2C mitochondrial-like	SLIRP1, SLIRP2
LOC105834858	1.44529	0.004722	gene_11535	1.29985	0.00176274	uncharacterized LOC105834858	CG13024
LOC105831294	1.17919	8.73605e-06	gene_7109	1.5925	1.40733e-11	ATP synthase subunit b%2C mitochondrial	ATPsynB, CG17300
LOC105835909	1.04266	0.0494176	gene_2405	1.78734	1.7459e-12	myosin light chain alkali%2C transcript variant X1	Mlc1
LOC105830817	1.01894	0.000409676	gene_15173	1.82003	7.55297e-10	tyrosine kinase receptor Cad96Ca%2C transcript variant X1	Cad96Ca
LOC105829670	1.55358	1.8399e-08	gene_425	1.18839	1.70899e-08	uncharacterized LOC105829670	CG33199
LOC105830698	-1.21308	9.45686e-08	gene_7171	-1.51316	2.83291e-13	protein tipE%2C transcript variant X2	Teh2
LOC105832608	1.26008	1.50567e-06	gene_9619	1.45219	2.11832e-13	probable isocitrate dehydrogenase [NAD] subunit alpha%2C mitochondrial	Idh3a, CG32026, CG3483
LOC105831644	-1.03194	0.000604545	gene_498	-1.74924	9.79702e-17	FERM%2C ARHGEF and pleckstrin domain-containing protein 1%2C transcript variant X1	Cdep
LOC105836380	-1.22754	0.000514481	gene_13541	-1.45196	3.37652e-12	octopamine receptor beta-3R%2C transcript variant X15	Octbeta3R
LOC105839165	-1.1218	0.000124316	gene_6848	-1.5811	1.1827e-11	uncharacterized LOC105839165	CG14982
LOC105837434	1.17841	0.00571556	gene_10485	1.50109	0.000110136	proton-coupled amino acid transporter-like protein pathetic	CG8785
LOC105835809	-1.07481	0.00247875	gene_7991	-1.62745	7.06361e-10	uncharacterized LOC105835809%2C transcript variant X1	Drep2
LOC105831727	-1.03189	0.0139025	gene_5416	-1.69001	3.22429e-12	ras-related protein Rab-3%2C transcript variant X3	Rab3
LOC105832148	-1.11713	0.013141	gene_10964	-1.53803	3.5147e-10	phosphatase and actin regulator 4%2C transcript variant X5	CG32264
LOC105837049	-1.12296	1.0714e-05	gene_7102	-1.52892	5.76039e-11	5-hydroxytryptamine receptor 1	5-HT7
LOC105837236	1.02082	0.0175912	gene_8708	1.66608	1.30191e-09	D-aspartate oxidase	CG11236
LOC105833427	-1.30883	7.4264e-07	gene_13080	-1.29756	6.81802e-07	uncharacterized LOC105833427%2C transcript variant X1	beat-IIIc, beat-IIIb, beat-IIIa
LOC105840102	1.07768	2.53651e-06	gene_5363	1.57462	1.36077e-20	prohibitin-2	Phb2
LOC105836872	-1.05824	0.00404599	gene_2680	-1.59199	1.52081e-18	calcium-independent protein kinase C%2C transcript variant X2	Pkc98E
LOC105830972	-1.07941	0.000983325	gene_12393	-1.55693	7.37386e-09	heparan sulfate glucosamine 3-O-sulfotransferase 5%2C transcript variant X2	Hs3st-A
LOC105834675	1.08188	4.3649e-06	gene_3722	1.55112	1.23855e-08	proton-coupled amino acid transporter 1%2C transcript variant X10	CG16700
LOC105836356	-1.27531	0.0247721	gene_14186	-1.31499	6.29594e-11	uncharacterized LOC105836356	NA
LOC105830753	-1.15389	0.0166645	gene_1342	-1.45202	8.5403e-15	serine/threonine-protein kinase BRSK2%2C transcript variant X2	sff
LOC105835135	1.18595	0.00267737	gene_5650	1.41095	0.00014422	multifunctional protein ADE2	Paics
LOC105839089	-1.0523	0.00251163	gene_14178	-1.5639	7.40711e-15	acetylcholine receptor subunit beta-like 2	nAChRbeta2
LOC105832509	-1.03377	0.000595955	gene_9485	-1.58709	1.77297e-16	calcium-activated potassium channel slowpoke%2C transcript variant X39	slo
LOC105835644	1.1388	0.0100127	gene_14345	1.43599	1.12969e-08	glutathione S-transferase 1-1	gfzf
LOC105838136	-1.28843	0.00287824	gene_10359	-1.26637	1.99907e-11	uncharacterized LOC105838136	CG11539, CG12355
LOC105832826	1.20318	0.000179994	gene_10612	1.33867	1.85964e-15	iron-sulfur protein NUBPL%2C transcript variant X1	CG3262
LOC105830461	-1.1823	0.0144105	gene_5637	-1.35118	2.71972e-06	guanine nucleotide-binding protein G(o) subunit alpha	Galphao
LOC105834210	-1.04575	0.00107174	gene_9346	-1.52599	3.89542e-14	uncharacterized LOC105834210%2C transcript variant X2	NA
LOC105828739	1.25562	5.57608e-07	gene_4500	1.26485	1.08904e-12	mitochondrial-processing peptidase subunit beta	UQCR-C1
LOC105828639	-1.22434	0.00101895	gene_4868	-1.29123	4.07621e-09	putative tyramine receptor 2%2C transcript variant X4	Oct-TyrR
LOC105834496	1.13644	0.0165729	gene_11130	1.35889	0.0257164	keratin-associated protein 19-2	NA
LOC105832370	1.11907	0.00767942	gene_11611	1.37931	0.00404638	anther-specific proline-rich protein APG%2C transcript variant X2	Cpr50Cb
LOC105830447	-1.03961	0.000173023	gene_5896	-1.48422	2.34451e-10	beta-1%2C4-glucuronyltransferase 1	CG3253
LOC105837054	1.11706	0.000266433	gene_13539	1.36662	5.45123e-08	organic solute transporter alpha-like protein 3%2C transcript variant X1	CG6836
LOC105830538	1.00704	6.95458e-05	gene_12926	1.51442	1.58618e-16	importin-13	cdm
LOC105837629	1.18494	0.00667797	gene_7564	1.28395	0.000505811	neuroparsin-A	NA
LOC105838894	1.11427	2.74275e-05	gene_12745	1.36488	8.80936e-07	asparagine synthetase [glutamine-hydrolyzing]%2C transcript variant X2	AsnS
LOC105833416	-1.00435	4.91768e-05	gene_1915	-1.4982	1.46629e-17	brefeldin A-inhibited guanine nucleotide-exchange protein 3%2C transcript variant X1	CG5937
LOC105835517	-1.13361	0.000852591	gene_1527	-1.27295	1.25066e-09	rho-related BTB domain-containing protein 1%2C transcript variant X9	RhoBTB
LOC105835940	1.15092	9.5816e-05	gene_10344	1.2419	1.3142e-08	mitochondrial intermembrane space import and assembly protein 40-A	CG7950
LOC105839332	-1.02983	0.00893023	gene_12773	-1.3631	1.93594e-07	neural-cadherin%2C transcript variant X8	CadN2, CadN
LOC105838488	-1.15848	0.00065658	gene_8002	-1.19844	1.09783e-16	homeobox protein 5%2C transcript variant X3	CG43689
LOC105828950	1.04037	0.0303613	gene_10923	1.33144	1.80841e-06	MORN repeat-containing protein 4 homolog%2C transcript variant X2	rtp
LOC105837531	1.25196	4.9111e-07	gene_7235	1.10607	2.48588e-12	reticulon-4-interacting protein 1%2C mitochondrial	CG17221
LOC105839768	-1.08599	0.0016128	gene_11251	-1.25286	9.62253e-08	acetylcholine receptor subunit alpha-L1	nAChRalpha2
LOC105829201	1.10924	0.000165858	gene_7912	1.2101	4.62512e-12	NADH dehydrogenase [ubiquinone] 1 beta subcomplex subunit 10	ND-PDSW
LOC118645293	-1.01775	0.00103901	gene_4231	-1.25008	0.000648684	uncharacterized LOC118645293	NA
LOC105832168	1.15389	0.000336062	gene_1569	1.10121	0.00534033	uncharacterized LOC105832168	CG32816
LOC105834291	-1.03525	0.000710713	gene_3992	-1.22417	1.66423e-12	discoidin domain-containing receptor 2%2C transcript variant X2	NA
LOC105830340	-1.10206	7.35875e-06	gene_7511	-1.14808	3.58876e-08	glycogen synthase kinase-3 beta%2C transcript variant X5	gskt, sgg
LOC105838292	1.03242	0.0284126	gene_7577	1.21441	0.000628903	GAS2-like protein pickled eggs	pigs
LOC105839928	1.02903	5.09185e-05	gene_8944	1.2108	1.26128e-11	complex I intermediate-associated protein 30%2C mitochondrial	CIA30
LOC105833626	-1.04859	0.00169958	gene_13566	-1.17325	2.91672e-05	retinol-binding protein pinta%2C transcript variant X1	pinta
LOC105834237	-1.09715	0.030062	gene_9507	-1.11571	1.72137e-13	dipeptidase 1%2C transcript variant X1	NA
LOC105835975	1.17932	0.00429452	gene_3828	1.03299	0.00241763	endocuticle structural glycoprotein SgAbd-2	Cpr47Ea
LOC105835389	-1.10849	2.3516e-09	gene_8484	-1.07182	2.69114e-08	soma ferritin%2C transcript variant X1	Fer3HCH
LOC105839891	1.04549	1.69264e-05	gene_3628	1.07239	8.34729e-05	phytanoyl-CoA dioxygenase%2C transcript variant X1	CG14688
LOC114254384	-1.05534	0.00105459	gene_14583	-1.06162	1.20903e-09	B9 domain-containing protein 2	B9d2, tctn
LOC105829988	-1.09694	0.00358831	gene_11750	-1.01872	0.000144125	DNA fragmentation factor subunit beta%2C transcript variant X1	Drep4
LOC118645472	-1.00493	0.0089334	gene_1557	-1.11061	2.49678e-09	uncharacterized LOC118645472	NA
LOC105834114	-1.01933	0.000328284	gene_2029	-1.04605	2.36135e-13	uncharacterized LOC105834114%2C transcript variant X4	CG42795
LOC105830306	1.03205	0.000355163	gene_5751	1.02707	3.93707e-06	exosome complex component RRP46%2C transcript variant X5	Rrp46
LOC105838492	1.00503	0.000221811	gene_12934	1.04568	7.60227e-08	alpha-ketoglutarate-dependent dioxygenase alkB homolog 7%2C mitochondrial	CG14130
